# Supplementary material for: Comparative genomics of recent rapid adaptation in invasive spiders
Source: Research Square preprint supplement (doi:10.21203/rs.3.rs-7860671/v1), 2025-10-20
Supplement: Supplementary file 1 [file 43c30a2ccf4ac3c152b72363.xlsx]

## Sheet: Table S1
Table S1. Geographic distribution of invasive and non-invasive spiders
species_name	Genus	Family	Type	Origin	New geographic distributions
Loxosceles rufescens	Loxosceles	Sicariidae	Invasive	Mediterranean	US, Europe, South America, Austrilia
Loxosceles reclusa	Loxosceles	Sicariidae	Non-invasive	North America
Loxosceles deserta	Loxosceles	Sicariidae	Non-invasive	USA
Latrodectus hasselti	Latrodectus	Theridiidae	Invasive	Australia	New Zealand, Japan, Europe, UK
Latrodectus geometricus	Latrodectus	Theridiidae	Invasive	Africa	USA (southern states), Caribbean, South America, Australia, Asia
Latrodectus hesperus	Latrodectus	Theridiidae	Non-invasive	North America
Trichonephila clavata	Trichonephila	Nephilidae	Invasive	Japan, Korea, China, Taiwan	USA (southern state, particular Georgia and South Carolina)
Trichonephila antipodiana	Trichonephila	Nephilidae	Non-invasive	South Asia
Trichonephila clavipes	Trichonephila	Nephilidae	Non-invasive	Americas
Trichonephila inaurata	Trichonephila	Nephilidae	Non-invasive	South Africa and Madagascar
Trichonephila plumipes	Trichonephila	Nephilidae	Non-invasive	South Asia, Australia, and New Zealand
Heteropoda venatoria	Heteropoda	Sparassidae	Invasive	Asia	USA (southern states), Australia, Africa, tropical islands
Heteropoda davidbowie	Heteropoda	Sparassidae	Non-invasive	South Asia
Heteropoda simplex	Heteropoda	Sparassidae	Non-invasive	Southern China including Taiwan
Heteropoda tetrica	Heteropoda	Sparassidae	Non-invasive	South Asia

## Sheet: Table S2
Table S2. Information of genome/transcript assembly completeness assessement for 15 spider species and one outgroup scorpion species.
species_name	Genus	Family	Type	BUSCO (arachnida_odb10, n=2934)
Loxosceles rufescens	Loxosceles	Sicariidae	Invasive	C:90.4%[S:66.8%,D:23.6%],F:3.2%,M:8.4%
Loxosceles reclusa	Loxosceles	Sicariidae	Non-invasive	C:94.5%[S:68.6%,D:25.9%],F:2.0%,M:3.5%
Loxosceles deserta	Loxosceles	Sicariidae	Non-invasive	C:90.0%[S:75.1%,D:14.9%],F:2.6%,M:8.4%
Latrodectus hasselti	Latrodectus	Theridiidae	Invasive	C:90.2%[S:76.0%,D:14.2%],F:3.4%,M:7.4%
Latrodectus geometricus	Latrodectus	Theridiidae	Invasive	C:86.1%[S:76.7%,D:9.4%],F:4.1%,M:9.8%
Latrodectus hesperus	Latrodectus	Theridiidae	Non-invasive	C:97.6%[S:56.1%,D:41.5%],F:1.2%,M:1.2%
Trichonephila clavata	Trichonephila	Nephilidae	Invasive	C:95.6%[S:80.1%,D:15.5%],F:1.5%,M:2.9%
Trichonephila antipodiana	Trichonephila	Nephilidae	Non-invasive	C:96.2%[S:91.1%,D:5.1%],F:0.9%,M:2.9%
Trichonephila clavipes	Trichonephila	Nephilidae	Non-invasive	C:90.2%[S:79.2%,D:11.0%],F:5.6%,M:5.2%
Trichonephila inaurata	Trichonephila	Nephilidae	Non-invasive	C:93.8%[S:78.1%,D:15.7%],F:1.9%,M:4.3%
Trichonephila plumipes	Trichonephila	Nephilidae	Non-invasive	C:96.7%[S:72.5%,D:24.2%],F:1.3%,M:2.0%
Heteropoda venatoria	Heteropoda	Sparassidae	Invasive	C:90.3%[S:69.8%,D:20.5%],F:3.7%,M:9.0%
Heteropoda davidbowie	Heteropoda	Sparassidae	Non-invasive	C:90.6%[S:78.4%,D:12.2%],F:3.5%,M:5.9%
Heteropoda simplex	Heteropoda	Sparassidae	Non-invasive	C:90.5%[S:71.3%,D:19.2%],F:3.5%,M:7.0%
Heteropoda tetrica	Heteropoda	Sparassidae	Non-invasive	C:90.9%[S:68.1%,D:22.8%],F:3.8%,M:7.3%
Centruroides vittatus	Centruroides	Buthidae	Outgroup	C:99.2%[S:63.0%,D:36.2%],F:0.1%,M:0.7%

## Sheet: Table S3
Table S3. Information of genes under convergent acceleration in invasive spider branches.
ogg_id	Rho	Num_Nodes	Type	P-value	Gene
OG0010158	0.58849	15	Acceleration	0.00902344	hypothetical protein TNIN_11151 [Trichonephila inaurata madagascariensis]
OG0011183	0.570782	17	Acceleration	0.00657841	hypothetical protein TNIN_183311, partial [Trichonephila inaurata madagascariensis]
OG0003833	0.507737	19	Acceleration	0.0101265	homeobox protein engrailed [Trichonephila inaurata madagascariensis]
OG0007252	0.482805	13	Acceleration	0.0483982	MAGUK p55 subfamily member 5 [Trichonephila inaurata madagascariensis]
OG0006379	0.482805	13	Acceleration	0.0483982	adenylate cyclase type 5 [Trichonephila inaurata madagascariensis]
OG0002281	0.476331	17	Acceleration	0.0233422	telomere-associated protein RIF1 [Trichonephila inaurata madagascariensis]
OG0000625	0.475651	17	Acceleration	0.0235401	transposable element Tcb1 transposase [Trichonephila clavipes]
OG0003937	0.45542	15	Acceleration	0.0433081	adult-specific rigid cuticular protein 12.6 [Trichonephila inaurata madagascariensis]
OG0001290	0.454519	23	Acceleration	0.0105871	e3 ubiquitin-protein ligase HUWE1 [Trichonephila inaurata madagascariensis]
OG0010800	0.450333	25	Acceleration	0.00806042	NADH dehydrogenase 1 alpha subcomplex subunit 13 [Trichonephila inaurata madagascariensis]
OG0008282	0.44785	27	Acceleration	0.00602484	WD repeat-containing protein 70 [Trichonephila inaurata madagascariensis]
OG0006184	0.44785	27	Acceleration	0.00602484	NADH dehydrogenase 1 beta subcomplex subunit 7 [Trichonephila inaurata madagascariensis]
OG0007255	0.44785	27	Acceleration	0.00602484	2-oxoglutarate dehydrogenase, mitochondrial [Trichonephila inaurata madagascariensis]
OG0010958	0.441511	19	Acceleration	0.0253473	nudix hydrolase 24, chloroplastic [Trichonephila clavipes]
OG0010135	0.440959	25	Acceleration	0.00947637	uncharacterized protein TNCV_4390482 [Trichonephila clavipes]
OG0003525	0.438786	25	Acceleration	0.00983459	hypothetical protein TNIN_434852 [Trichonephila inaurata madagascariensis]
OG0009625	0.438786	25	Acceleration	0.00983459	replication factor C subunit 3 [Trichonephila inaurata madagascariensis]
OG0011111	0.438357	17	Acceleration	0.0368884	rho GTPase-activating protein 100F [Trichonephila inaurata madagascariensis]
OG0001432	0.438357	17	Acceleration	0.0368884	DUF4773 domain-containing protein [Trichonephila inaurata madagascariensis]
OG0001961	0.432697	23	Acceleration	0.014961	locomotion-related protein Hikaru genki [Trichonephila inaurata madagascariensis]
OG0003701	0.432697	23	Acceleration	0.014961	hypothetical protein TNIN_247001 [Trichonephila inaurata madagascariensis]
OG0007120	0.431968	21	Acceleration	0.0208005	transmembrane protein 132C [Trichonephila inaurata madagascariensis]
OG0008823	0.42836	25	Acceleration	0.0117272	TIMELESS-interacting protein [Trichonephila inaurata madagascariensis]
OG0006211	0.427239	25	Acceleration	0.0119487	uncharacterized protein TNCV_3746941 [Trichonephila clavipes]
OG0006128	0.427239	25	Acceleration	0.0119487	ATP synthase subunit d, mitochondrial [Trichonephila inaurata madagascariensis]
OG0003684	0.423405	17	Acceleration	0.0438198	GATA-binding factor A [Trichonephila inaurata madagascariensis]
OG0002171	0.422053	23	Acceleration	0.0176221	plasma membrane calcium-transporting ATPase 3 [Trichonephila inaurata madagascariensis]
OG0009249	0.419435	19	Acceleration	0.033648	mitochondrial inner membrane protein OXA1L [Trichonephila inaurata madagascariensis]
OG0002707	0.418414	21	Acceleration	0.0251523	protein Wnt-7a [Trichonephila inaurata madagascariensis]
OG0007982	0.418274	23	Acceleration	0.0186622	TBC1 domain family member 31 [Trichonephila inaurata madagascariensis]
OG0005190	0.417315	27	Acceleration	0.0104922	e3 ubiquitin-protein ligase RNF167 [Trichonephila inaurata madagascariensis]
OG0001532	0.417315	27	Acceleration	0.0104922	putative beat protein [Trichonephila inaurata madagascariensis]
OG0000691	0.415761	25	Acceleration	0.0144402	uncharacterized protein TNIN_414071 [Trichonephila inaurata madagascariensis]
OG0005863	0.415761	25	Acceleration	0.0144402	probable inactive tRNA-specific adenosine deaminase-like protein 3 [Trichonephila inaurata madagascariensis]
OG0002913	0.413187	21	Acceleration	0.0270301	PHD and RING finger domain-containing protein 1, partial [Trichonephila inaurata madagascariensis]
OG0001894	0.413187	21	Acceleration	0.0270301	FMRFamide receptor [Trichonephila inaurata madagascariensis]
OG0001496	0.413187	21	Acceleration	0.0270301	pro-Pol polyprotein [Trichonephila inaurata madagascariensis]
OG0007889	0.410875	23	Acceleration	0.0208548	protein daughter of sevenless [Trichonephila inaurata madagascariensis]
OG0005926	0.407137	27	Acceleration	0.0125337	diphthine methyl ester synthase [Trichonephila inaurata madagascariensis]
OG0008743	0.403851	23	Acceleration	0.0231409	ribosome-releasing factor 2, mitochondrial [Trichonephila inaurata madagascariensis]
OG0000018	0.403851	23	Acceleration	0.0231409	transposable element Tcb2 transposase [Trichonephila inaurata madagascariensis]
OG0011041	0.401677	21	Acceleration	0.0315953	uncharacterized protein TNCV_4036561 [Trichonephila clavipes]
OG0009645	0.401677	21	Acceleration	0.0315953	dynein assembly factor 4, axonemal [Trichonephila inaurata madagascariensis]
OG0005972	0.397621	23	Acceleration	0.0253473	39S ribosomal protein L35, mitochondrial [Trichonephila inaurata madagascariensis]
OG0003944	0.39736	19	Acceleration	0.0441713	hypothetical protein TNIN_184371 [Trichonephila inaurata madagascariensis]
OG0001520	0.396958	27	Acceleration	0.0149193	u35-Nephitoxin-Nsp1a_1 [Trichonephila inaurata madagascariensis]
OG0005914	0.396958	27	Acceleration	0.0149193	39S ribosomal protein L40, mitochondrial [Trichonephila inaurata madagascariensis]
OG0003565	0.396958	27	Acceleration	0.0149193	phosphatidate cytidylyltransferase, mitochondrial [Trichonephila inaurata madagascariensis]
OG0000136	0.396958	27	Acceleration	0.0149193	hypothetical protein TNIN_450951 [Trichonephila inaurata madagascariensis]
OG0010508	0.396958	27	Acceleration	0.0149193	uncharacterized protein TNCV_4336591 [Trichonephila clavipes]
OG0009370	0.393445	19	Acceleration	0.0463016	xaa-Pro aminopeptidase 1 [Trichonephila inaurata madagascariensis]
OG0003731	0.392598	25	Acceleration	0.0208967	integrator complex subunit 13 [Trichonephila inaurata madagascariensis]
OG0002155	0.392598	25	Acceleration	0.0208967	protein argonaute-4 [Trichonephila inaurata madagascariensis]
OG0005639	0.392598	25	Acceleration	0.0208967	CCR4-NOT transcription complex subunit 9 [Trichonephila inaurata madagascariensis]
OG0004531	0.390563	25	Acceleration	0.021569	PX domain-containing protein kinase-like protein [Trichonephila inaurata madagascariensis]
OG0005784	0.390563	25	Acceleration	0.021569	uridine diphosphate glucose pyrophosphatase NUDT22 [Trichonephila inaurata madagascariensis]
OG0000131	0.389428	23	Acceleration	0.028525	hypothetical protein TNIN_391391 [Trichonephila inaurata madagascariensis]
OG0000551	0.389428	23	Acceleration	0.028525	neuroglian [Trichonephila inaurata madagascariensis]
OG0000502	0.389428	23	Acceleration	0.028525	mariner Mos1 transposase [Trichonephila clavipes]
OG0000007	0.389428	23	Acceleration	0.028525	retrovirus-related Pol polyprotein from transposon 297 [Trichonephila inaurata madagascariensis]
OG0003558	0.389428	23	Acceleration	0.028525	hypothetical protein TNIN_475561, partial [Trichonephila inaurata madagascariensis]
OG0010689	0.389428	23	Acceleration	0.028525	mitochondrial pyruvate carrier 2 [Trichonephila inaurata madagascariensis]
OG0003208	0.38678	27	Acceleration	0.0176962	uncharacterized protein F13E9.13, mitochondrial, partial [Trichonephila clavipes]
OG0007509	0.38678	27	Acceleration	0.0176962	u6 snRNA phosphodiesterase [Trichonephila inaurata madagascariensis]
OG0000344	0.384941	21	Acceleration	0.0394051	hypothetical protein TNIN_391091 [Trichonephila inaurata madagascariensis]
OG0010061	0.381051	25	Acceleration	0.0249673	nucleic-acid-binding protein from transposon X-element [Trichonephila clavipes]
OG0002693	0.381051	25	Acceleration	0.0249673	hypothetical protein TNIN_161771 [Trichonephila inaurata madagascariensis]
OG0008729	0.381051	25	Acceleration	0.0249673	RRM domain-containing protein [Trichonephila inaurata madagascariensis]
OG0000458	0.380608	21	Acceleration	0.0416757	arginine kinase [Trichonephila inaurata madagascariensis]
OG0010360	0.377964	25	Acceleration	0.0261654	uncharacterized protein TNCV_4796851 [Trichonephila clavipes]
OG0010012	0.377964	25	Acceleration	0.0261654	peptidyl-prolyl cis-trans isomerase E [Trichonephila inaurata madagascariensis]
OG0010265	0.377964	25	Acceleration	0.0261654	transmembrane protein 70 homolog, mitochondrial [Trichonephila inaurata madagascariensis]
OG0002100	0.376601	27	Acceleration	0.0209161	serrate RNA effector molecule homolog [Trichonephila inaurata madagascariensis]
OG0008880	0.376601	27	Acceleration	0.0209161	hypothetical protein TNIN_429371 [Trichonephila inaurata madagascariensis]
OG0008101	0.376601	27	Acceleration	0.0209161	apoptosis inhibitor 5 [Trichonephila inaurata madagascariensis]
OG0009881	0.376601	27	Acceleration	0.0209161	39S ribosomal protein L30 [Trichonephila inaurata madagascariensis]
OG0008267	0.376601	27	Acceleration	0.0209161	ubiquinol-cytochrome-c reductase complex assembly factor 2 [Trichonephila inaurata madagascariensis]
OG0000405	0.375624	21	Acceleration	0.0444232	cuticle protein 16.8 [Trichonephila inaurata madagascariensis]
OG0008107	0.375624	21	Acceleration	0.0444232	RNA polymerase II subunit A C-terminal domain phosphatase [Trichonephila inaurata madagascariensis]
OG0006188	0.375624	21	Acceleration	0.0444232	gastrula zinc finger protein [Trichonephila inaurata madagascariensis]
OG0010631	0.375004	23	Acceleration	0.0349551	hypothetical protein TNIN_47831 [Trichonephila inaurata madagascariensis]
OG0002177	0.373355	23	Acceleration	0.0357638	condensin-2 complex subunit G2 [Trichonephila inaurata madagascariensis]
OG0006008	0.373355	23	Acceleration	0.0357638	malectin [Trichonephila inaurata madagascariensis]
OG0008517	0.369504	25	Acceleration	0.0297072	uncharacterized protein TNIN_412681 [Trichonephila inaurata madagascariensis]
OG0003068	0.369504	25	Acceleration	0.0297072	hypothetical protein TNIN_495381 [Trichonephila inaurata madagascariensis]
OG0002710	0.368204	21	Acceleration	0.0487961	hypothetical protein TNIN_306131 [Trichonephila inaurata madagascariensis]
OG0002312	0.368204	21	Acceleration	0.0487961	UNC93-like protein [Trichonephila inaurata madagascariensis]
OG0010592	0.368204	21	Acceleration	0.0487961	spaetzle domain-containing protein [Trichonephila inaurata madagascariensis]
OG0010892	0.368204	21	Acceleration	0.0487961	dual specificity protein phosphatase 23 [Trichonephila inaurata madagascariensis]
OG0001722	0.366423	27	Acceleration	0.0246352	calcitonin gene-related peptide type 1 receptor [Trichonephila inaurata madagascariensis]
OG0004782	0.366423	27	Acceleration	0.0246352	cyclin-C [Trichonephila inaurata madagascariensis]
OG0010692	0.366423	27	Acceleration	0.0246352	CAP-Gly domain-containing protein [Trichonephila inaurata madagascariensis]
OG0003264	0.366423	27	Acceleration	0.0246352	lysosome membrane protein 2 [Trichonephila inaurata madagascariensis]
OG0001297	0.366423	27	Acceleration	0.0246352	xin actin-binding repeat-containing protein 2 [Trichonephila inaurata madagascariensis]
OG0004537	0.366423	27	Acceleration	0.0246352	organic cation transporter protein [Trichonephila inaurata madagascariensis]
OG0010109	0.366423	27	Acceleration	0.0246352	acidic phospholipase A2 PA4 [Trichonephila inaurata madagascariensis]
OG0009730	0.365366	25	Acceleration	0.031585	ankyrin repeat domain-containing protein 29 [Trichonephila inaurata madagascariensis]
OG0008663	0.365366	25	Acceleration	0.031585	serine proteinase stubble [Trichonephila inaurata madagascariensis]
OG0004985	0.365366	25	Acceleration	0.031585	protein phosphatase 1 regulatory subunit 12A [Trichonephila inaurata madagascariensis]
OG0000016	0.365366	25	Acceleration	0.031585	adult-specific rigid cuticular protein 15.7 [Trichonephila inaurata madagascariensis]
OG0007776	0.365366	25	Acceleration	0.031585	tether containing UBX domain for GLUT4 [Trichonephila inaurata madagascariensis]
OG0005208	0.365366	25	Acceleration	0.031585	hypothetical protein TNIN_354521 [Trichonephila inaurata madagascariensis]
OG0007691	0.360581	23	Acceleration	0.042584	maltase-glucoamylase, intestinal [Trichonephila inaurata madagascariensis]
OG0009558	0.360581	23	Acceleration	0.042584	n(6)-adenine-specific methyltransferase METTL4 [Trichonephila inaurata madagascariensis]
OG0001001	0.357957	25	Acceleration	0.0352013	ethanol acetyltransferase 1 [Trichonephila inaurata madagascariensis]
OG0006754	0.357957	25	Acceleration	0.0352013	mannose-1-phosphate guanyltransferase beta-A [Trichonephila inaurata madagascariensis]
OG0001435	0.357957	25	Acceleration	0.0352013	bardet-Biedl syndrome 7 protein homolog [Trichonephila inaurata madagascariensis]
OG0009406	0.357957	25	Acceleration	0.0352013	hypothetical protein TNIN_86301 [Trichonephila inaurata madagascariensis]
OG0005382	0.356244	27	Acceleration	0.028914	hypothetical protein TNIN_255301 [Trichonephila inaurata madagascariensis]
OG0009562	0.356244	27	Acceleration	0.028914	dynactin subunit 3 [Trichonephila inaurata madagascariensis]
OG0007433	0.356244	27	Acceleration	0.028914	MOB kinase activator-like 3 [Trichonephila inaurata madagascariensis]
OG0010665	0.356244	27	Acceleration	0.028914	hypothetical protein TNIN_337461 [Trichonephila inaurata madagascariensis]
OG0008476	0.356244	27	Acceleration	0.028914	cytoplasmic tRNA 2-thiolation protein 2 [Trichonephila inaurata madagascariensis]
OG0009428	0.356244	27	Acceleration	0.028914	2-(3-amino-3-carboxypropyl)histidine synthase subunit 1 [Trichonephila inaurata madagascariensis]
OG0006330	0.352767	25	Acceleration	0.0379404	HTH CENPB-type domain-containing protein [Trichonephila inaurata madagascariensis]
OG0006021	0.352767	25	Acceleration	0.0379404	protein nervous wreck [Trichonephila inaurata madagascariensis]
OG0007651	0.352767	25	Acceleration	0.0379404	e3 ubiquitin-protein ligase TRIM9 [Trichonephila inaurata madagascariensis]
OG0009161	0.352767	25	Acceleration	0.0379404	galactokinase [Trichonephila inaurata madagascariensis]
OG0001693	0.352767	25	Acceleration	0.0379404	cyclin-L1 [Trichonephila inaurata madagascariensis]
OG0006885	0.352767	25	Acceleration	0.0379404	MAGUK p55 subfamily member 6 [Trichonephila inaurata madagascariensis]
OG0004976	0.352767	25	Acceleration	0.0379404	uncharacterized protein TNCV_4098721 [Trichonephila clavipes]
OG0003249	0.352767	25	Acceleration	0.0379404	tyrosine-protein kinase Src42A [Trichonephila inaurata madagascariensis]
OG0010527	0.34641	25	Acceleration	0.0415401	uncharacterized protein TNCV_1172661 [Trichonephila clavipes]
OG0008120	0.346066	27	Acceleration	0.0338177	dynein light chain Tctex-type 1 [Trichonephila inaurata madagascariensis]
OG0008904	0.346066	27	Acceleration	0.0338177	nicotinate phosphoribosyltransferase [Trichonephila inaurata madagascariensis]
OG0010224	0.346066	27	Acceleration	0.0338177	uncharacterized protein TNCV_2894011 [Trichonephila clavipes]
OG0007765	0.346066	27	Acceleration	0.0338177	inositol polyphosphate 5-phosphatase OCRL [Trichonephila inaurata madagascariensis]
OG0007288	0.346066	27	Acceleration	0.0338177	vesicle-associated membrane protein 714 [Trichonephila inaurata madagascariensis]
OG0009508	0.346066	27	Acceleration	0.0338177	complex I intermediate-associated protein 30, mitochondrial [Trichonephila inaurata madagascariensis]
OG0010279	0.340168	25	Acceleration	0.0453522	uncharacterized protein TNCV_2583481 [Trichonephila clavipes]
OG0000160	0.335888	27	Acceleration	0.0394158	protein ALP1-like [Trichonephila inaurata madagascariensis]
OG0006170	0.335888	27	Acceleration	0.0394158	40S ribosomal protein S5 [Trichonephila inaurata madagascariensis]
OG0009140	0.335888	27	Acceleration	0.0394158	sorting nexin-32 [Trichonephila inaurata madagascariensis]
OG0007431	0.335888	27	Acceleration	0.0394158	uncharacterized protein TNCV_774261 [Trichonephila clavipes]
OG0007153	0.335888	27	Acceleration	0.0394158	peptidyl-prolyl cis-trans isomerase NIMA-interacting 1 [Trichonephila inaurata madagascariensis]
OG0005798	0.335888	27	Acceleration	0.0394158	nucleic acid dioxygenase ALKBH1 [Trichonephila inaurata madagascariensis]
OG0003499	0.335888	27	Acceleration	0.0394158	protein transport protein Sec61 subunit alpha isoform 2 [Trichonephila inaurata madagascariensis]
OG0007699	0.335888	27	Acceleration	0.0394158	tartrate-resistant acid phosphatase type 5 [Trichonephila inaurata madagascariensis]
OG0000110	0.334863	25	Acceleration	0.0488198	DUF4817 domain-containing protein [Trichonephila inaurata madagascariensis]
OG0003810	0.334863	25	Acceleration	0.0488198	hypothetical protein TNIN_344941 [Trichonephila inaurata madagascariensis]
OG0006960	0.334863	25	Acceleration	0.0488198	ANK_REP_REGION domain-containing protein [Trichonephila inaurata madagascariensis]
OG0007562	0.334863	25	Acceleration	0.0488198	pre-mRNA-splicing factor ATP-dependent RNA helicase DHX16 [Trichonephila inaurata madagascariensis]
OG0001863	0.334863	25	Acceleration	0.0488198	uncharacterized protein TNIN_415811 [Trichonephila inaurata madagascariensis]
OG0005565	0.334863	25	Acceleration	0.0488198	zinc finger protein 649 [Trichonephila inaurata madagascariensis]
OG0008656	0.334863	25	Acceleration	0.0488198	RNA polymerase II-associated protein 3 [Trichonephila inaurata madagascariensis]
OG0002897	0.334863	25	Acceleration	0.0488198	leucine-rich repeat flightless-interacting protein 2 [Trichonephila inaurata madagascariensis]
OG0005859	0.334863	25	Acceleration	0.0488198	solute carrier family 66 member 2 [Trichonephila inaurata madagascariensis]
OG0003300	0.325709	27	Acceleration	0.0457816	CD63 antigen [Trichonephila inaurata madagascariensis]
OG0005341	0.325709	27	Acceleration	0.0457816	retinoblastoma-binding protein 5 homolog [Trichonephila inaurata madagascariensis]
OG0002337	0.325709	27	Acceleration	0.0457816	hypothetical protein TNIN_44831 [Trichonephila inaurata madagascariensis]
OG0005977	0.325709	27	Acceleration	0.0457816	uncharacterized protein TNCV_13221 [Trichonephila clavipes]
OG0001319	0.325709	27	Acceleration	0.0457816	stress-activated protein kinase JNK [Trichonephila inaurata madagascariensis]
OG0010659	0.325709	27	Acceleration	0.0457816	mitochondrial import receptor subunit TOM20 homolog [Trichonephila inaurata madagascariensis]

## Sheet: Table S4
Table S4. Information of genes under convergent deceleration in invasive spider branches.
ogg_id	Rho	Num_Nodes	Type	P-value	Gene
OG0005572	-0.325709	27	Deceleration	0.0457816	26S proteasome non-ATPase regulatory subunit 4 [Trichonephila inaurata madagascariensis]
OG0008332	-0.325709	27	Deceleration	0.0457816	26S proteasome non-ATPase regulatory subunit 8 [Trichonephila inaurata madagascariensis]
OG0000803	-0.325709	27	Deceleration	0.0457816	organic cation transporter 1 [Trichonephila inaurata madagascariensis]
OG0001433	-0.325709	27	Deceleration	0.0457816	microtubule-associated protein [Trichonephila inaurata madagascariensis]
OG0002963	-0.325709	27	Deceleration	0.0457816	hypothetical protein TNIN_345281 [Trichonephila inaurata madagascariensis]
OG0004483	-0.325709	27	Deceleration	0.0457816	mitochondrial carrier protein Rim2 [Trichonephila inaurata madagascariensis]
OG0005036	-0.325709	27	Deceleration	0.0457816	e3 ubiquitin-protein ligase AMFR [Trichonephila inaurata madagascariensis]
OG0004368	-0.325709	27	Deceleration	0.0457816	hypothetical protein TNIN_416271 [Trichonephila inaurata madagascariensis]
OG0008929	-0.325709	27	Deceleration	0.0457816	UBA-like domain-containing protein 2 [Trichonephila inaurata madagascariensis]
OG0010780	-0.334863	25	Deceleration	0.0488198	hypothetical protein TNIN_180201 [Trichonephila inaurata madagascariensis]
OG0004371	-0.334863	25	Deceleration	0.0488198	liprin-beta-1 [Trichonephila inaurata madagascariensis]
OG0008878	-0.334863	25	Deceleration	0.0488198	PAN2-PAN3 deadenylation complex subunit pan3 [Trichonephila inaurata madagascariensis]
OG0004460	-0.335888	27	Deceleration	0.0394158	large proline-rich protein BAG6 [Trichonephila inaurata madagascariensis]
OG0009290	-0.335888	27	Deceleration	0.0394158	inositol monophosphatase 1 [Trichonephila inaurata madagascariensis]
OG0005562	-0.335888	27	Deceleration	0.0394158	TNF receptor-associated factor 4 [Trichonephila inaurata madagascariensis]
OG0006932	-0.335888	27	Deceleration	0.0394158	hypothetical protein TNIN_22191 [Trichonephila inaurata madagascariensis]
OG0009264	-0.335888	27	Deceleration	0.0394158	actin-like protein 6A [Trichonephila inaurata madagascariensis]
OG0004676	-0.335888	27	Deceleration	0.0394158	protein sel-1 homolog 1 [Trichonephila inaurata madagascariensis]
OG0007444	-0.340168	25	Deceleration	0.0453522	exportin-T [Trichonephila inaurata madagascariensis]
OG0009528	-0.340168	25	Deceleration	0.0453522	sex peptide receptor [Trichonephila inaurata madagascariensis]
OG0007070	-0.346066	27	Deceleration	0.0338177	MAGUK p55 subfamily member 5 [Trichonephila inaurata madagascariensis]
OG0005853	-0.346066	27	Deceleration	0.0338177	KRR1 small subunit processome component homolog [Trichonephila inaurata madagascariensis]
OG0004654	-0.346066	27	Deceleration	0.0338177	uncharacterized protein TNCV_976681 [Trichonephila clavipes]
OG0005804	-0.346066	27	Deceleration	0.0338177	ribosome biogenesis protein NSA2 homolog [Trichonephila inaurata madagascariensis]
OG0010064	-0.346066	27	Deceleration	0.0338177	mediator of RNA polymerase II transcription subunit 18 [Trichonephila inaurata madagascariensis]
OG0003097	-0.346066	27	Deceleration	0.0338177	phosphatidylinositol 3-kinase regulatory subunit alpha [Trichonephila inaurata madagascariensis]
OG0003408	-0.346066	27	Deceleration	0.0338177	nuclear receptor coactivator 1 [Trichonephila inaurata madagascariensis]
OG0005479	-0.346066	27	Deceleration	0.0338177	proliferation-associated protein 2G4 [Trichonephila inaurata madagascariensis]
OG0003070	-0.34641	25	Deceleration	0.0415401	rap guanine nucleotide exchange factor 4 [Trichonephila inaurata madagascariensis]
OG0007722	-0.352767	25	Deceleration	0.0379404	microsomal glutathione S-transferase 3 [Trichonephila inaurata madagascariensis]
OG0008472	-0.352767	25	Deceleration	0.0379404	prenylcysteine oxidase 1 [Trichonephila inaurata madagascariensis]
OG0009356	-0.352767	25	Deceleration	0.0379404	bystin [Trichonephila inaurata madagascariensis]
OG0002361	-0.356244	27	Deceleration	0.028914	phosphofurin acidic cluster sorting protein 1 [Trichonephila inaurata madagascariensis]
OG0007503	-0.356244	27	Deceleration	0.028914	sperm-associated antigen 7 homolog, partial [Trichonephila inaurata madagascariensis]
OG0001815	-0.356244	27	Deceleration	0.028914	legumain [Trichonephila inaurata madagascariensis]
OG0004279	-0.357122	23	Deceleration	0.0446097	period circadian protein [Trichonephila inaurata madagascariensis]
OG0009180	-0.366423	27	Deceleration	0.0246352	hypothetical protein TNCV_4642471 [Trichonephila clavipes]
OG0002182	-0.366423	27	Deceleration	0.0246352	splicing factor 3B subunit 1 [Trichonephila inaurata madagascariensis]
OG0005555	-0.366423	27	Deceleration	0.0246352	transmembrane protein 59, partial [Trichonephila inaurata madagascariensis]
OG0009926	-0.366423	27	Deceleration	0.0246352	UPF0547 protein C16orf87-like protein [Trichonephila inaurata madagascariensis]
OG0010636	-0.366423	27	Deceleration	0.0246352	NTF2-related export protein 2 [Trichonephila inaurata madagascariensis]
OG0003740	-0.369504	25	Deceleration	0.0297072	MFS_1_like domain-containing protein [Trichonephila inaurata madagascariensis]
OG0010911	-0.371113	23	Deceleration	0.0368884	uncharacterized protein TNCV_4285741 [Trichonephila clavipes]
OG0010680	-0.373355	23	Deceleration	0.0357638	voltage-dependent L-type calcium channel subunit beta-2 [Trichonephila inaurata madagascariensis]
OG0009571	-0.375004	23	Deceleration	0.0349551	GRIP and coiled-coil domain-containing protein 2 [Trichonephila inaurata madagascariensis]
OG0006045	-0.375624	21	Deceleration	0.0444232	DNA-dependent protein kinase catalytic subunit [Trichonephila inaurata madagascariensis]
OG0010102	-0.377964	25	Deceleration	0.0261654	hypothetical protein TNIN_422091 [Trichonephila inaurata madagascariensis]
OG0010023	-0.377964	25	Deceleration	0.0261654	tantalus domain-containing protein [Trichonephila inaurata madagascariensis]
OG0009320	-0.389428	23	Deceleration	0.028525	3-hydroxyisobutyrate dehydrogenase, mitochondrial [Trichonephila inaurata madagascariensis]
OG0008242	-0.389428	23	Deceleration	0.028525	DDB1-and CUL4-associated factor 4 [Trichonephila inaurata madagascariensis]
OG0004470	-0.389588	23	Deceleration	0.0284597	uncharacterized protein TNCV_1904861 [Trichonephila clavipes]
OG0010934	-0.394899	19	Deceleration	0.0455003	u21-Nephitoxin-Nsp1b_1 [Trichonephila inaurata madagascariensis]
OG0010564	-0.396958	27	Deceleration	0.0149193	dual specificity protein phosphatase 3 [Trichonephila inaurata madagascariensis]
OG0005262	-0.401677	21	Deceleration	0.0315953	desumoylating isopeptidase 1 [Trichonephila inaurata madagascariensis]
OG0001756	-0.401677	21	Deceleration	0.0315953	dual specificity tyrosine-phosphorylation-regulated kinase 2 [Trichonephila inaurata madagascariensis]
OG0002196	-0.403162	25	Deceleration	0.0176922	f-box only protein 38 [Trichonephila inaurata madagascariensis]
OG0005598	-0.407137	27	Deceleration	0.0125337	ubiquitin-like protein 4A [Trichonephila inaurata madagascariensis]
OG0007559	-0.407137	27	Deceleration	0.0125337	SNW domain-containing protein 1 [Trichonephila inaurata madagascariensis]
OG0007095	-0.417315	27	Deceleration	0.0104922	chitin-binding type-2 domain-containing protein [Trichonephila inaurata madagascariensis]
OG0010668	-0.418274	23	Deceleration	0.0186622	voltage-gated hydrogen channel 1 [Trichonephila inaurata madagascariensis]
OG0006326	-0.427239	25	Deceleration	0.0119487	enkurin domain-containing protein 1 [Trichonephila inaurata madagascariensis]
OG0005543	-0.427493	27	Deceleration	0.0087521	protein AF-10 [Trichonephila inaurata madagascariensis]
OG0002460	-0.43515	21	Deceleration	0.0198793	g_PROTEIN_RECEP_F3_4 domain-containing protein [Trichonephila inaurata madagascariensis]
OG0003803	-0.438786	25	Deceleration	0.00983459	deubiquitinase DESI2 [Trichonephila inaurata madagascariensis]
OG0003017	-0.450749	21	Deceleration	0.0158613	hypothetical protein TNIN_1291 [Trichonephila inaurata madagascariensis]
OG0010594	-0.453557	25	Deceleration	0.00761913	hypothetical protein TNIN_184231 [Trichonephila inaurata madagascariensis]
OG0007102	-0.478385	27	Deceleration	0.00334967	hypothetical protein TNIN_449361 [Trichonephila inaurata madagascariensis]
OG0004685	-0.478385	27	Deceleration	0.00334967	cullin-4B [Trichonephila inaurata madagascariensis]
OG0009853	-0.484974	25	Deceleration	0.00432626	transmembrane protein 68, partial [Trichonephila inaurata madagascariensis]
OG0007124	-0.507093	21	Deceleration	0.00665561	lysine-specific demethylase 3A [Trichonephila inaurata madagascariensis]

## Sheet: Table S5
Table S5. Information of enriched gene ontologies for genes under convergent rapid evolution in invasive spider branches with significance.
go_id	Pvalue	adjusted-Pvalue	go_term
GO:0097250	1.09305e-07	0	mitochondrial respirasome assembly
GO:0010257	1.96558e-06	0	NADH dehydrogenase complex assembly
GO:0032981	1.96558e-06	0	mitochondrial respiratory chain complex I assembly
GO:0007409	3.6118e-06	0	axonogenesis
GO:0033108	7.10614e-06	0.004	mitochondrial respiratory chain complex assembly
GO:0061564	7.61877e-06	0.0033	axon development
GO:0009987	1.34019e-05	0.0029	cellular process
GO:0051239	1.50012e-05	0.005	regulation of multicellular organismal process
GO:0048666	1.57644e-05	0.0067	neuron development
GO:0031175	2.75427e-05	0.01	neuron projection development
GO:0048812	3.37119e-05	0.0091	neuron projection morphogenesis
GO:0060560	3.47692e-05	0.0083	developmental growth involved in morphogenesis
GO:0120039	3.5384e-05	0.0077	plasma membrane bounded cell projection morphogenesis
GO:0048858	3.71289e-05	0.0086	cell projection morphogenesis
GO:0065007	4.63453e-05	0.008	biological regulation
GO:0048675	8.75693e-05	0.0138	axon extension
GO:0000902	9.05062e-05	0.0129	cell morphogenesis
GO:0006120	9.65786e-05	0.0122	mitochondrial electron transport, NADH to ubiquinone
GO:0050795	9.66084e-05	0.0116	regulation of behavior
GO:0016043	0.000111485	0.011	cellular component organization
GO:1990138	0.000116719	0.0105	neuron projection extension
GO:0048667	0.000118362	0.01	cell morphogenesis involved in neuron differentiation
GO:0030182	0.000122678	0.0104	neuron differentiation
GO:0007411	0.000176807	0.0108	axon guidance
GO:0016180	0.000183154	0.0104	snRNA processing
GO:0097485	0.000224965	0.0138	neuron projection guidance
GO:0007346	0.000254149	0.0141	regulation of mitotic cell cycle
GO:0038007	0.000254156	0.0214	netrin-activated signaling pathway
GO:0043523	0.00026419	0.0207	regulation of neuron apoptotic process
GO:0050789	0.00027837	0.02	regulation of biological process
GO:0120036	0.000289885	0.0194	plasma membrane bounded cell projection organization
GO:0007005	0.000324101	0.0194	mitochondrion organization
GO:0048699	0.000341385	0.0188	generation of neurons
GO:0030030	0.000359687	0.0182	cell projection organization
GO:0046856	0.000399295	0.0217	phosphatidylinositol dephosphorylation
GO:0051402	0.000408597	0.0211	neuron apoptotic process
GO:0071840	0.00042975	0.0211	cellular component organization or biogenesis
GO:0016049	0.000439025	0.0205	cell growth
GO:0009060	0.0004573	0.021	aerobic respiration
GO:1904059	0.000481574	0.022	regulation of locomotor rhythm
GO:0043111	0.000505216	0.0278	replication fork arrest
GO:0016073	0.000548637	0.0271	snRNA metabolic process
GO:0048519	0.000557652	0.0265	negative regulation of biological process
GO:0048588	0.000577273	0.0259	developmental cell growth
GO:0048468	0.000634179	0.0262	cell development
GO:0045333	0.000650653	0.0257	cellular respiration
GO:0050794	0.000689528	0.026	regulation of cellular process
GO:0022607	0.000697051	0.0254	cellular component assembly
GO:0043277	0.000791066	0.0269	apoptotic cell clearance
GO:0006119	0.000803141	0.0264	oxidative phosphorylation
GO:0022008	0.000836355	0.0259	neurogenesis
GO:0048523	0.000843177	0.0346	negative regulation of cellular process
GO:0043524	0.00105424	0.0374	negative regulation of neuron apoptotic process
GO:0007275	0.00106768	0.0367	multicellular organism development
GO:0019637	0.00107028	0.036	organophosphate metabolic process
GO:0018193	0.00108393	0.0361	peptidyl-amino acid modification
GO:0034472	0.00120418	0.0372	snRNA 3'-end processing
GO:0017183	0.00124772	0.0455	protein histidyl modification to diphthamide
GO:0033615	0.00124772	0.0447	mitochondrial proton-transporting ATP synthase complex assembly
GO:0043461	0.00124772	0.044	proton-transporting ATP synthase complex assembly
GO:0006979	0.00143591	0.0459	response to oxidative stress
GO:0048856	0.00146527	0.0455	anatomical structure development
GO:0032501	0.00150847	0.0454	multicellular organismal process
GO:0046839	0.00154283	0.0462	phospholipid dephosphorylation
GO:0009653	0.00166137	0.0465	anatomical structure morphogenesis
GO:0019646	0.00172304	0.0464	aerobic electron transport chain

## Sheet: Table S6
Table S6. Information of genes under convergent intensification or relaxation of selection in invasive spiders.
ogg_id	K-value	Selection	Pvalue	adjusted-Pvalue	gene
OG0001526	25.46	intensification	0	0	atrial natriuretic peptide receptor 2 [Trichonephila inaurata madagascariensis]
OG0001884	14.28	intensification	0	0	myocardin-related transcription factor B, partial [Trichonephila inaurata madagascariensis]
OG0007937	50	intensification	0	0	hypothetical protein TNIN_87761 [Trichonephila inaurata madagascariensis]
OG0011161	50	intensification	0.0006	0.0104119	guanine nucleotide exchange factor DBS [Trichonephila inaurata madagascariensis]
OG0000559	15.46	intensification	0.0021	0.0263957	glutamate receptor ionotropic, kainate 2 [Trichonephila inaurata madagascariensis]
OG0000721	44.62	intensification	0	0	acetoacetyl-CoA synthetase, partial [Trichonephila inaurata madagascariensis]
OG0001965	16.04	intensification	0	0	hypothetical protein TNIN_327091 [Trichonephila inaurata madagascariensis]
OG0002180	10.94	intensification	0	0	RNA-dependent RNA polymerase 1 [Trichonephila inaurata madagascariensis]
OG0003927	50	intensification	0	0	MFS-type transporter SLC18B1 [Trichonephila inaurata madagascariensis]
OG0004521	4.59	intensification	0	0	tyrosine-protein phosphatase non-receptor type 21 [Trichonephila inaurata madagascariensis]
OG0005980	17.46	intensification	0	0	hypothetical protein TNIN_448041 [Trichonephila inaurata madagascariensis]
OG0006284	13.27	intensification	0	0	acetyl-coenzyme A synthetase, cytoplasmic [Trichonephila inaurata madagascariensis]
OG0007252	17.27	intensification	0	0	MAGUK p55 subfamily member 5 [Trichonephila inaurata madagascariensis]
OG0007531	18.17	intensification	0	0	golgi resident protein GCP60 [Trichonephila inaurata madagascariensis]
OG0008019	50	intensification	0	0	uncharacterized protein TNCV_3285321 [Trichonephila clavipes]
OG0007023	50	intensification	0.0001	0.00257417	multidrug resistance-associated protein 7 [Trichonephila inaurata madagascariensis]
OG0010700	5.18	intensification	0.0013	0.0184325	uncharacterized protein TNCV_2899561 [Trichonephila clavipes]
OG0006776	4.74	intensification	0.003	0.033974	hypothetical protein TNIN_158571 [Trichonephila inaurata madagascariensis]
OG0007145	19.8	intensification	0.0046	0.0469146	multidrug resistance-associated protein 1 [Trichonephila inaurata madagascariensis]
OG0000930	0.61	relaxation	0	0	putative phosphoenolpyruvate synthase [Trichonephila inaurata madagascariensis]
OG0001937	0	relaxation	0.0001	0.00257417	echinoderm microtubule-associated protein-like CG42247 [Trichonephila inaurata madagascariensis]
OG0008093	0.39	relaxation	0.0002	0.00450065	glycosyltransferase 25 family member [Trichonephila inaurata madagascariensis]
OG0000855	0.05	relaxation	0.0017	0.0223758	rho guanine nucleotide exchange factor 17 [Trichonephila inaurata madagascariensis]
OG0001841	0.47	relaxation	0.0035	0.038511	adenylate cyclase type 5 [Trichonephila inaurata madagascariensis]
OG0002600	0	relaxation	0.0036	0.03924	ninjurin-2 [Trichonephila inaurata madagascariensis]
OG0002713	0.23	relaxation	0.0039	0.0417276	glutamate-gated chloride channel [Trichonephila inaurata madagascariensis]
OG0004690	0.06	relaxation	0.0045	0.0463693	hexokinase_2 domain-containing protein [Trichonephila inaurata madagascariensis]
OG0001171	0.31	relaxation	0.0047	0.0477948	63 kDa sperm flagellar membrane protein [Trichonephila inaurata madagascariensis]
OG0001202	18.28	intensification	0	0	putative phosphoenolpyruvate synthase [Trichonephila clavipes]
OG0001616	50	intensification	0	0	low-density lipoprotein receptor [Trichonephila inaurata madagascariensis]
OG0002345	50	intensification	0	0	ras-related protein Rab-18A [Trichonephila inaurata madagascariensis]
OG0002711	50	intensification	0	0	nose resistant to fluoxetine protein 6 [Trichonephila inaurata madagascariensis]
OG0004263	3.19	intensification	0	0	talin-2 [Trichonephila inaurata madagascariensis]
OG0005026	28.73	intensification	0	0	2-hydroxyacyl-CoA lyase 2 [Trichonephila inaurata madagascariensis]
OG0006066	39.99	intensification	0	0	phosphomevalonate kinase [Trichonephila inaurata madagascariensis]
OG0008990	50	intensification	0	0	hypothetical protein TNIN_149461 [Trichonephila inaurata madagascariensis]
OG0001025	2.13	intensification	0.0001	0.00257417	protein grainyhead [Trichonephila inaurata madagascariensis]
OG0007173	3.51	intensification	0.0001	0.00257417	hypothetical protein TNIN_232961 [Trichonephila inaurata madagascariensis]
OG0008432	18.76	intensification	0.0001	0.00257417	BICD family-like cargo adapter 1 [Trichonephila inaurata madagascariensis]
OG0003729	2.58	intensification	0.0003	0.00622857	nucleoside diphosphate-linked moiety X motif 19 [Trichonephila inaurata madagascariensis]
OG0007310	2.06	intensification	0.0003	0.00622857	ubiquitin carboxyl-terminal hydrolase 4 [Trichonephila inaurata madagascariensis]
OG0004370	2.45	intensification	0.0004	0.00792727	zinc finger protein 710 [Trichonephila inaurata madagascariensis]
OG0004687	4.71	intensification	0.0005	0.00901292	5'-AMP-activated protein kinase subunit gamma-2 [Trichonephila inaurata madagascariensis]
OG0008605	2.43	intensification	0.0005	0.00901292	RNA-binding protein 28 [Trichonephila inaurata madagascariensis]
OG0001080	18.47	intensification	0.0006	0.0104119	basement membrane-specific heparan sulfate proteoglycan core protein [Trichonephila inaurata madagascariensis]
OG0007329	4.82	intensification	0.0009	0.014367	insulin receptor substrate 2-B [Trichonephila inaurata madagascariensis]
OG0001901	50	intensification	0.001	0.0155022	putative inorganic phosphate cotransporter [Trichonephila inaurata madagascariensis]
OG0010216	2.35	intensification	0.0011	0.0166456	glutamate receptor ionotropic, kainate 2 [Trichonephila inaurata madagascariensis]
OG0003648	3.28	intensification	0.0012	0.0173676	microphthalmia-associated transcription factor [Trichonephila inaurata madagascariensis]
OG0005282	19.85	intensification	0.0012	0.0173676	hypothetical protein TNIN_116862 [Trichonephila inaurata madagascariensis]
OG0008381	46.78	intensification	0.0012	0.0173676	glucose-induced degradation protein 4 homolog [Trichonephila inaurata madagascariensis]
OG0011069	44.14	intensification	0.0012	0.0173676	poly polymerase tankyrase-1 [Trichonephila inaurata madagascariensis]
OG0006196	19.63	intensification	0.0013	0.0184325	cGMP-dependent protein kinase [Argiope bruennichi]
OG0010549	4.92	intensification	0.0015	0.0204775	estradiol 17-beta-dehydrogenase 2 [Trichonephila inaurata madagascariensis]
OG0007794	2.44	intensification	0.0028	0.0327183	relaxin receptor 2 [Trichonephila inaurata madagascariensis]
OG0003753	50	intensification	0.003	0.033974	forkhead box protein F1 [Trichonephila inaurata madagascariensis]
OG0004770	50	intensification	0.003	0.033974	iroquois-class homeodomain protein IRX-6 [Trichonephila inaurata madagascariensis]
OG0009220	50	intensification	0.003	0.033974	hypothetical protein TNIN_336421 [Trichonephila inaurata madagascariensis]
OG0001868	50	intensification	0.0042	0.0440589	e3 ubiquitin-protein ligase RBBP6 [Trichonephila inaurata madagascariensis]
OG0001125	0.53	relaxation	0	0	CREB-binding protein [Trichonephila inaurata madagascariensis]
OG0001217	0.26	relaxation	0	0	acetylcholinesterase-1 [Trichonephila inaurata madagascariensis]
OG0001810	0	relaxation	0	0	mitogen-activated protein kinase kinase kinase 13 [Trichonephila inaurata madagascariensis]
OG0005176	0	relaxation	0	0	hypothetical protein TNIN_464531 [Trichonephila inaurata madagascariensis]
OG0006317	0.05	relaxation	0	0	nose resistant to fluoxetine protein 6 [Trichonephila clavata]
OG0003650	0.15	relaxation	0.0001	0.00257417	protein kintoun [Trichonephila inaurata madagascariensis]
OG0008013	0.02	relaxation	0.0001	0.00257417	uncharacterized protein TNCV_2564281 [Trichonephila clavipes]
OG0010715	0.26	relaxation	0.0001	0.00257417	sulfotransferase 1C2 [Trichonephila inaurata madagascariensis]
OG0001686	0.35	relaxation	0.0002	0.00450065	phospholipase A-2-activating protein [Trichonephila inaurata madagascariensis]
OG0003684	0.11	relaxation	0.0002	0.00450065	GATA-binding factor A [Trichonephila inaurata madagascariensis]
OG0011128	0.33	relaxation	0.0002	0.00450065	ras-related protein Rab-32 [Trichonephila inaurata madagascariensis]
OG0010562	0.38	relaxation	0.0003	0.00622857	protein giant-lens [Trichonephila inaurata madagascariensis]
OG0002991	0	relaxation	0.0005	0.00901292	sterol regulatory element-binding protein 1 [Trichonephila inaurata madagascariensis]
OG0003520	0.22	relaxation	0.0009	0.014367	transposon Tf2-6 polyprotein [Trichonephila clavipes]
OG0011063	0.02	relaxation	0.0009	0.014367	hypothetical protein TNCV_805191 [Trichonephila clavipes]
OG0001725	0.01	relaxation	0.0014	0.0195328	neural-cadherin [Trichonephila inaurata madagascariensis]
OG0008822	0.12	relaxation	0.0021	0.0263957	hypothetical protein TNIN_337181 [Trichonephila inaurata madagascariensis]
OG0009249	0.29	relaxation	0.0022	0.0274547	mitochondrial inner membrane protein OXA1L [Trichonephila inaurata madagascariensis]
OG0008477	0.52	relaxation	0.0029	0.0333835	SUMO-activating enzyme subunit 2-B, partial [Trichonephila inaurata madagascariensis]
OG0003632	0.5	relaxation	0.0031	0.0349929	speckle targeted PIP5K1A-regulated poly(A) polymerase [Trichonephila inaurata madagascariensis]
OG0005158	0.54	relaxation	0.0035	0.038511	acyl-coenzyme A synthetase ACSM3, mitochondrial [Trichonephila inaurata madagascariensis]
OG0010305	0.22	relaxation	0.0039	0.0417276	s-adenosylmethionine mitochondrial carrier protein [Trichonephila inaurata madagascariensis]
OG0010369	0.1	relaxation	0.0043	0.0448383	NADH dehydrogenase 1 beta subcomplex subunit 5, mitochondrial [Trichonephila inaurata madagascariensis]
OG0000513	18.09	intensification	0	0	amine oxidase B [Trichonephila inaurata madagascariensis]
OG0000685	10.15	intensification	0	0	CD109 antigen [Trichonephila inaurata madagascariensis]
OG0003517	8	intensification	0	0	pyruvate dehydrogenase E1 component subunit beta, mitochondrial [Trichonephila inaurata madagascariensis]
OG0004292	6.1	intensification	0	0	structural maintenance of chromosomes protein 1A [Trichonephila inaurata madagascariensis]
OG0004294	6.23	intensification	0	0	spectrin alpha chain [Trichonephila inaurata madagascariensis]
OG0004531	50	intensification	0	0	PX domain-containing protein kinase-like protein [Trichonephila inaurata madagascariensis]
OG0004751	30.43	intensification	0	0	uncharacterized protein TNCV_1335251 [Trichonephila clavipes]
OG0004837	47.52	intensification	0	0	integrator complex subunit 6 [Trichonephila inaurata madagascariensis]
OG0004860	15.75	intensification	0	0	cyclin-dependent kinase 8 [Trichonephila inaurata madagascariensis]
OG0004948	3.88	intensification	0	0	bromodomain-containing protein 7 [Trichonephila inaurata madagascariensis]
OG0005247	16.65	intensification	0	0	hypothetical protein TNIN_329911 [Trichonephila inaurata madagascariensis]
OG0006843	23.74	intensification	0	0	hemocyte protein-glutamine gamma-glutamyltransferase [Trichonephila clavipes]
OG0007025	49.75	intensification	0	0	f-box only protein 33 [Trichonephila inaurata madagascariensis]
OG0007052	50	intensification	0	0	protein transport protein Sec24D [Trichonephila inaurata madagascariensis]
OG0007063	4.37	intensification	0	0	TBC1 domain family member 15 [Trichonephila inaurata madagascariensis]
OG0007072	44.78	intensification	0	0	protein C-ets-2 [Trichonephila inaurata madagascariensis]
OG0007722	50	intensification	0	0	microsomal glutathione S-transferase 3 [Trichonephila inaurata madagascariensis]
OG0008358	35.39	intensification	0	0	uncharacterized protein TNCV_716601 [Trichonephila clavipes]
OG0008663	29.43	intensification	0	0	serine proteinase stubble [Trichonephila inaurata madagascariensis]
OG0008895	8.63	intensification	0	0	4-trimethylaminobutyraldehyde dehydrogenase [Trichonephila inaurata madagascariensis]
OG0009316	5.15	intensification	0	0	hypothetical protein TNIN_175341 [Trichonephila inaurata madagascariensis]
OG0009356	50	intensification	0	0	bystin [Trichonephila inaurata madagascariensis]
OG0009558	10.35	intensification	0	0	n(6)-adenine-specific methyltransferase METTL4 [Trichonephila inaurata madagascariensis]
OG0009662	7.94	intensification	0	0	hypothetical protein TNIN_91231 [Trichonephila inaurata madagascariensis]
OG0009932	50	intensification	0	0	phosphatidylinositol 3,4,5-trisphosphate 3-phosphatase and dual-specificity protein phosphatase PTEN [Trichonephila inaurata madagascariensis]
OG0009947	50	intensification	0	0	probable glutamine synthetase [Trichonephila inaurata madagascariensis]
OG0009984	19.91	intensification	0	0	CCDC92 domain-containing protein [Trichonephila inaurata madagascariensis]
OG0010063	34.03	intensification	0	0	hypothetical protein TNIN_35661 [Trichonephila inaurata madagascariensis]
OG0010303	5	intensification	0	0	coiled-coil domain-containing protein 25 [Trichonephila inaurata madagascariensis]
OG0010360	5.07	intensification	0	0	uncharacterized protein TNCV_4796851 [Trichonephila clavipes]
OG0010383	12	intensification	0	0	cleavage and polyadenylation specificity factor subunit 5 [Trichonephila inaurata madagascariensis]
OG0001407	3.65	intensification	0.0001	0.00257417	major facilitator superfamily domain-containing protein 6 [Trichonephila inaurata madagascariensis]
OG0002097	17.26	intensification	0.0001	0.00257417	sodium- and chloride-dependent GABA transporter ine [Trichonephila inaurata madagascariensis]
OG0002944	3.32	intensification	0.0001	0.00257417	multiple epidermal growth factor-like domains protein 10 [Trichonephila inaurata madagascariensis]
OG0002985	16.43	intensification	0.0001	0.00257417	symplekin [Trichonephila inaurata madagascariensis]
OG0003024	1.87	intensification	0.0001	0.00257417	c2H2-type domain-containing protein [Trichonephila inaurata madagascariensis]
OG0004666	3.58	intensification	0.0001	0.00257417	UPF0577 protein KIAA1324-like [Trichonephila inaurata madagascariensis]
OG0006779	28.93	intensification	0.0001	0.00257417	protein phosphatase 1H [Trichonephila inaurata madagascariensis]
OG0009592	7.66	intensification	0.0001	0.00257417	NADH dehydrogenase 1 alpha subcomplex subunit 9, mitochondrial [Trichonephila inaurata madagascariensis]
OG0004350	8.98	intensification	0.0002	0.00450065	clathrin heavy chain 1 [Trichonephila inaurata madagascariensis]
OG0005574	6.36	intensification	0.0002	0.00450065	ankyrin-2 [Trichonephila inaurata madagascariensis]
OG0006762	50	intensification	0.0002	0.00450065	WW domain-containing adapter protein with coiled-coil [Trichonephila inaurata madagascariensis]
OG0008617	47.95	intensification	0.0002	0.00450065	transmembrane protein 165 [Trichonephila inaurata madagascariensis]
OG0009177	2.78	intensification	0.0002	0.00450065	sedoheptulokinase [Trichonephila inaurata madagascariensis]
OG0001164	27.65	intensification	0.0003	0.00622857	ammonium transporter Rh type B-B [Trichonephila inaurata madagascariensis]
OG0007228	4.96	intensification	0.0003	0.00622857	heparan-alpha-glucosaminide N-acetyltransferase [Trichonephila inaurata madagascariensis]
OG0007935	2.67	intensification	0.0003	0.00622857	protein VAC14 homolog [Trichonephila inaurata madagascariensis]
OG0010059	50	intensification	0.0003	0.00622857	alpha- and gamma-adaptin-binding protein p34 [Trichonephila inaurata madagascariensis]
OG0002493	50	intensification	0.0004	0.00792727	hypothetical protein TNIN_349892 [Trichonephila inaurata madagascariensis]
OG0004632	2.39	intensification	0.0004	0.00792727	calx-beta domain-containing protein [Trichonephila inaurata madagascariensis]
OG0007199	23.67	intensification	0.0004	0.00792727	NAD(+) hydrolase sarm1 [Trichonephila inaurata madagascariensis]
OG0009189	2.6	intensification	0.0004	0.00792727	dihydroorotate dehydrogenase [Trichonephila inaurata madagascariensis]
OG0000783	10.18	intensification	0.0005	0.00901292	spectrin beta chain [Trichonephila inaurata madagascariensis]
OG0001460	2.79	intensification	0.0005	0.00901292	chromobox protein homolog 3 [Trichonephila inaurata madagascariensis]
OG0002211	9.22	intensification	0.0005	0.00901292	tubby protein homolog [Trichonephila clavipes]
OG0008882	1.97	intensification	0.0005	0.00901292	uncharacterized protein TNCV_549141 [Trichonephila clavipes]
OG0009306	14.94	intensification	0.0005	0.00901292	down syndrome cell adhesion molecule [Trichonephila clavipes]
OG0001476	4.7	intensification	0.0006	0.0104119	u7 snRNA-associated Sm-like protein LSm10 [Trichonephila inaurata madagascariensis]
OG0002460	50	intensification	0.0006	0.0104119	g_PROTEIN_RECEP_F3_4 domain-containing protein [Trichonephila inaurata madagascariensis]
OG0008565	2.9	intensification	0.0006	0.0104119	caseinolytic peptidase B protein homolog [Trichonephila inaurata madagascariensis]
OG0009915	10.46	intensification	0.0006	0.0104119	uncharacterized protein TNCV_1146641 [Trichonephila clavipes]
OG0010233	12.46	intensification	0.0006	0.0104119	regucalcin [Trichonephila inaurata madagascariensis]
OG0000906	3.5	intensification	0.0007	0.0117952	helicase domino [Trichonephila inaurata madagascariensis]
OG0011127	2.29	intensification	0.0007	0.0117952	hypothetical protein TNIN_137391 [Trichonephila inaurata madagascariensis]
OG0002098	50	intensification	0.0008	0.0131005	unconventional myosin ID [Trichonephila clavipes]
OG0008317	4.74	intensification	0.0008	0.0131005	beta-1,4-N-acetylgalactosaminyltransferase bre-4 [Trichonephila inaurata madagascariensis]
OG0009068	46.82	intensification	0.0008	0.0131005	uncharacterized protein TNCV_1261601 [Trichonephila clavipes]
OG0010934	17.02	intensification	0.001	0.0155022	u21-Nephitoxin-Nsp1b_1 [Trichonephila inaurata madagascariensis]
OG0001195	23.9	intensification	0.0011	0.0166456	peptidyl-prolyl cis-trans isomerase [Trichonephila inaurata madagascariensis]
OG0010830	10.56	intensification	0.0011	0.0166456	MICOS complex subunit MIC13 [Trichonephila inaurata madagascariensis]
OG0002123	2.55	intensification	0.0012	0.0173676	tensin-3 [Trichonephila inaurata madagascariensis]
OG0004714	50	intensification	0.0012	0.0173676	protein FAM43A [Trichonephila inaurata madagascariensis]
OG0002995	1.69	intensification	0.0016	0.0213008	lysosomal alpha-mannosidase [Trichonephila inaurata madagascariensis]
OG0007995	2	intensification	0.0016	0.0213008	vacuolar fusion protein MON1 homolog A [Trichonephila inaurata madagascariensis]
OG0011091	3.48	intensification	0.0017	0.0223758	alpha-crystallin B chain [Trichonephila inaurata madagascariensis]
OG0007530	2.24	intensification	0.0019	0.0244998	VPS35 endosomal protein sorting factor-like [Trichonephila inaurata madagascariensis]
OG0007615	5.4	intensification	0.0019	0.0244998	decapping and exoribonuclease protein [Trichonephila inaurata madagascariensis]
OG0001094	11.28	intensification	0.002	0.0255531	RNA-binding protein Nova-1 [Trichonephila inaurata madagascariensis]
OG0010304	14.01	intensification	0.002	0.0255531	hypothetical protein TNIN_248351 [Trichonephila inaurata madagascariensis]
OG0009254	50	intensification	0.0021	0.0263957	RCC1-like G exchanging factor-like protein [Trichonephila inaurata madagascariensis]
OG0003494	23.56	intensification	0.0023	0.0285495	major facilitator superfamily domain-containing protein 10 [Trichonephila inaurata madagascariensis]
OG0003939	30.34	intensification	0.0026	0.0307939	hypothetical protein TNIN_464661 [Trichonephila inaurata madagascariensis]
OG0005703	11.87	intensification	0.0029	0.0333835	HIG1 domain-containing protein [Trichonephila inaurata madagascariensis]
OG0001786	3.14	intensification	0.003	0.033974	arginyl-tRNA--protein transferase 1 [Trichonephila inaurata madagascariensis]
OG0002212	50	intensification	0.003	0.033974	methylglutaconyl-CoA hydratase, mitochondrial [Trichonephila inaurata madagascariensis]
OG0009363	50	intensification	0.0032	0.0358318	putative peptidyl-tRNA hydrolase PTRHD1 [Trichonephila inaurata madagascariensis]
OG0010987	18.76	intensification	0.0032	0.0358318	CDGSH iron-sulfur domain-containing protein 3, mitochondrial [Trichonephila inaurata madagascariensis]
OG0005679	6.26	intensification	0.0033	0.0368923	heterogeneous nuclear ribonucleoprotein H [Trichonephila inaurata madagascariensis]
OG0007761	2.04	intensification	0.0039	0.0417276	hypothetical protein TNIN_392601 [Trichonephila inaurata madagascariensis]
OG0009320	50	intensification	0.0039	0.0417276	3-hydroxyisobutyrate dehydrogenase, mitochondrial [Trichonephila inaurata madagascariensis]
OG0004864	50	intensification	0.0041	0.0434015	protein FAM107B [Trichonephila clavata]
OG0006340	35.44	intensification	0.0041	0.0434015	neuroendocrine protein 7B2 [Trichonephila inaurata madagascariensis]
OG0007987	16.16	intensification	0.0042	0.0440589	target of rapamycin complex 2 subunit MAPKAP1, partial [Trichonephila inaurata madagascariensis]
OG0010102	39.8	intensification	0.0043	0.0448383	hypothetical protein TNIN_422091 [Trichonephila inaurata madagascariensis]
OG0001153	6.14	intensification	0.0045	0.0463693	sodium-independent sulfate anion transporter [Trichonephila inaurata madagascariensis]
OG0001837	17.69	intensification	0.0049	0.0491126	GLOBIN domain-containing protein [Trichonephila inaurata madagascariensis]
OG0005442	14.12	intensification	0.0049	0.0491126	kidney mitochondrial carrier protein 1 [Trichonephila inaurata madagascariensis]
OG0009742	21.26	intensification	0.0049	0.0491126	ataxin-3 [Trichonephila inaurata madagascariensis]
OG0000308	0	relaxation	0	0	glutathione S-transferase Mu 1 [Trichonephila inaurata madagascariensis]
OG0000551	0	relaxation	0	0	neuroglian [Trichonephila inaurata madagascariensis]
OG0002119	0	relaxation	0	0	integrin alpha-4 [Trichonephila inaurata madagascariensis]
OG0002150	0	relaxation	0	0	activating signal cointegrator 1 complex subunit 3 [Trichonephila inaurata madagascariensis]
OG0002254	0.34	relaxation	0	0	chromodomain Y-like protein [Trichonephila inaurata madagascariensis]
OG0002425	0	relaxation	0	0	microspherule protein 1 [Trichonephila inaurata madagascariensis]
OG0005111	0.29	relaxation	0	0	uncharacterized protein TNCV_4142871 [Trichonephila clavipes]
OG0005328	0.27	relaxation	0	0	cytosolic Fe-S cluster assembly factor narfl [Trichonephila inaurata madagascariensis]
OG0005524	0.01	relaxation	0	0	inactive peptidyl-prolyl cis-trans isomerase FKBP6 [Trichonephila inaurata madagascariensis]
OG0006076	0	relaxation	0	0	hypothetical protein TNIN_178871 [Trichonephila inaurata madagascariensis]
OG0006793	0.52	relaxation	0	0	phosphatidylcholine:ceramide cholinephosphotransferase 1 [Trichonephila inaurata madagascariensis]
OG0006927	0.63	relaxation	0	0	nuclear pore complex protein Nup98-Nup96 [Trichonephila inaurata madagascariensis]
OG0007405	0.48	relaxation	0	0	ankyrin repeat and fibronectin type-III domain-containing protein 1 [Trichonephila inaurata madagascariensis]
OG0007611	0.27	relaxation	0	0	lon protease homolog, mitochondrial [Trichonephila inaurata madagascariensis]
OG0009658	0	relaxation	0	0	docking protein 6 [Trichonephila inaurata madagascariensis]
OG0010985	0	relaxation	0	0	uncharacterized protein TNCV_1355121 [Trichonephila clavipes]
OG0000793	0.76	relaxation	0.0001	0.00257417	alpha-1-macroglobulin [Trichonephila inaurata madagascariensis]
OG0001354	0.76	relaxation	0.0001	0.00257417	p protein [Trichonephila inaurata madagascariensis]
OG0002303	0.47	relaxation	0.0001	0.00257417	p3 protein, partial [Trichonephila inaurata madagascariensis]
OG0004924	0.02	relaxation	0.0001	0.00257417	hypothetical protein TNIN_286261, partial [Trichonephila inaurata madagascariensis]
OG0005991	0.27	relaxation	0.0001	0.00257417	j domain-containing protein [Trichonephila inaurata madagascariensis]
OG0009255	0.27	relaxation	0.0001	0.00257417	macrophage migration inhibitory factor homolog [Trichonephila inaurata madagascariensis]
OG0009809	0.26	relaxation	0.0001	0.00257417	astacin-like metalloprotease toxin 1 [Trichonephila inaurata madagascariensis]
OG0000557	0	relaxation	0.0002	0.00450065	cdc42 homolog [Trichonephila inaurata madagascariensis]
OG0003458	0	relaxation	0.0002	0.00450065	galectin [Trichonephila inaurata madagascariensis]
OG0010893	0	relaxation	0.0002	0.00450065	mitochondrial import inner membrane translocase subunit Tim9 [Trichonephila inaurata madagascariensis]
OG0000929	0.66	relaxation	0.0003	0.00622857	ATP-dependent translocase ABCB1 [Trichonephila inaurata madagascariensis]
OG0003680	0.47	relaxation	0.0003	0.00622857	fanconi anemia group J protein [Trichonephila inaurata madagascariensis]
OG0006031	0	relaxation	0.0003	0.00622857	hypothetical protein TNIN_211532 [Trichonephila inaurata madagascariensis]
OG0010237	0.34	relaxation	0.0004	0.00792727	glutathione S-transferase theta-1 [Trichonephila inaurata madagascariensis]
OG0002608	0.01	relaxation	0.0005	0.00901292	ML domain-containing protein [Trichonephila inaurata madagascariensis]
OG0001713	0.56	relaxation	0.0006	0.0104119	transposable element Tc3 transposase [Trichonephila clavipes]
OG0003396	0.14	relaxation	0.0008	0.0131005	uncharacterized protein TNCV_4525301 [Trichonephila clavipes]
OG0005322	0.27	relaxation	0.0008	0.0131005	26S proteasome regulatory subunit 6A [Trichonephila inaurata madagascariensis]
OG0005904	0.5	relaxation	0.0011	0.0166456	aggregate spider glue 1 [Trichonephila inaurata madagascariensis]
OG0006865	0.39	relaxation	0.0011	0.0166456	hypothetical protein TNIN_355911 [Trichonephila inaurata madagascariensis]
OG0008853	0.5	relaxation	0.0011	0.0166456	hypothetical protein TNIN_277081 [Trichonephila inaurata madagascariensis]
OG0010808	0	relaxation	0.0012	0.0173676	multifunctional methyltransferase subunit TRM112-like protein [Trichonephila inaurata madagascariensis]
OG0008108	0.59	relaxation	0.0013	0.0184325	ATP-dependent RNA helicase SUV3 homolog, mitochondrial [Trichonephila inaurata madagascariensis]
OG0002972	0.49	relaxation	0.0017	0.0223758	CUB domain-containing protein [Trichonephila inaurata madagascariensis]
OG0008560	0.37	relaxation	0.0017	0.0223758	TGF-beta-activated kinase 1 and MAP3K7-binding protein 2 [Trichonephila inaurata madagascariensis]
OG0005782	0.54	relaxation	0.0018	0.0234269	slit-like protein [Trichonephila inaurata madagascariensis]
OG0003986	0.46	relaxation	0.0019	0.0244998	TD and POZ domain-containing protein 3 [Trichonephila inaurata madagascariensis]
OG0000519	0.44	relaxation	0.002	0.0255531	sulfotransferase 1C4 [Trichonephila inaurata madagascariensis]
OG0008225	0	relaxation	0.0021	0.0263957	saccharopine dehydrogenase-like oxidoreductase [Trichonephila clavipes]
OG0003569	0.4	relaxation	0.0024	0.0289161	hypothetical protein TNIN_144151 [Trichonephila inaurata madagascariensis]
OG0005438	0.4	relaxation	0.0024	0.0289161	protein tumorous imaginal discs, mitochondrial [Trichonephila inaurata madagascariensis]
OG0006881	0	relaxation	0.0024	0.0289161	RNA-binding protein fusilli [Trichonephila inaurata madagascariensis]
OG0001126	0	relaxation	0.0025	0.0297611	translation elongation factor 2 [Trichonephila inaurata madagascariensis]
OG0001420	0.22	relaxation	0.0025	0.0297611	transportin-1 [Trichonephila inaurata madagascariensis]
OG0006401	0.46	relaxation	0.0029	0.0333835	zinc transporter ZIP10 [Trichonephila inaurata madagascariensis]
OG0007899	0	relaxation	0.0029	0.0333835	putative glutathione-specific gamma-glutamylcyclotransferase 2 [Trichonephila inaurata madagascariensis]
OG0004683	0.21	relaxation	0.003	0.033974	dimethylglycine dehydrogenase, mitochondrial, partial [Trichonephila inaurata madagascariensis]
OG0003008	0.53	relaxation	0.0036	0.03924	calcium-activated chloride channel regulator 2 [Trichonephila inaurata madagascariensis]
OG0005864	0.09	relaxation	0.0036	0.03924	uncharacterized protein TNCV_3836461 [Trichonephila clavipes]
OG0004356	0	relaxation	0.0037	0.0400795	hypothetical protein TNIN_418641 [Trichonephila inaurata madagascariensis]
OG0009568	0.29	relaxation	0.004	0.0426015	2-oxoglutarate and iron-dependent oxygenase domain-containing protein 2 [Trichonephila inaurata madagascariensis]
OG0006042	0	relaxation	0.0045	0.0463693	hypothetical protein TNIN_158111 [Trichonephila inaurata madagascariensis]
OG0000955	3.02	intensification	0	0	innexin inx2 [Trichonephila inaurata madagascariensis]
OG0001297	10.58	intensification	0	0	xin actin-binding repeat-containing protein 2 [Trichonephila inaurata madagascariensis]
OG0001769	22.47	intensification	0	0	hypothetical protein TNIN_212031 [Trichonephila inaurata madagascariensis]
OG0001829	15.49	intensification	0	0	quinone oxidoreductase [Trichonephila inaurata madagascariensis]
OG0002075	47.89	intensification	0	0	ubiquitin carboxyl-terminal hydrolase 25 [Trichonephila inaurata madagascariensis]
OG0002080	50	intensification	0	0	hypothetical protein TNIN_235942 [Trichonephila inaurata madagascariensis]
OG0002100	5.58	intensification	0	0	serrate RNA effector molecule homolog [Trichonephila inaurata madagascariensis]
OG0002122	26.42	intensification	0	0	2-aminomuconic semialdehyde dehydrogenase [Trichonephila inaurata madagascariensis]
OG0002176	34.32	intensification	0	0	metastasis-associated protein MTA1 [Trichonephila inaurata madagascariensis]
OG0002207	16.96	intensification	0	0	hypothetical protein TNIN_211851 [Trichonephila inaurata madagascariensis]
OG0002225	31.19	intensification	0	0	hypothetical protein TNIN_308741 [Trichonephila inaurata madagascariensis]
OG0002227	28.11	intensification	0	0	protein roadkill [Trichonephila inaurata madagascariensis]
OG0002297	3.24	intensification	0	0	glutamate receptor [Trichonephila inaurata madagascariensis]
OG0002308	5.71	intensification	0	0	neprilysin-2 [Trichonephila inaurata madagascariensis]
OG0002375	1.99	intensification	0	0	glucose transporter type 1 [Trichonephila inaurata madagascariensis]
OG0002447	50	intensification	0	0	paraspeckle component 1 [Trichonephila inaurata madagascariensis]
OG0003097	2.92	intensification	0	0	phosphatidylinositol 3-kinase regulatory subunit alpha [Trichonephila inaurata madagascariensis]
OG0003173	2.28	intensification	0	0	protein CLEC16A homolog [Trichonephila inaurata madagascariensis]
OG0003247	2.12	intensification	0	0	exonuclease mut-7 homolog [Trichonephila inaurata madagascariensis]
OG0003367	3.6	intensification	0	0	glutathione hydrolase 1 proenzyme [Trichonephila inaurata madagascariensis]
OG0003386	18.76	intensification	0	0	n-alpha-acetyltransferase 35, NatC auxiliary subunit, partial [Trichonephila inaurata madagascariensis]
OG0003583	5.83	intensification	0	0	polyadenylate-binding protein 2 [Trichonephila inaurata madagascariensis]
OG0003628	48.8	intensification	0	0	SUMO-conjugating enzyme UBC9 [Trichonephila inaurata madagascariensis]
OG0003691	14.13	intensification	0	0	inactive pancreatic lipase-related protein 1 [Trichonephila inaurata madagascariensis]
OG0003723	33.38	intensification	0	0	werner syndrome ATP-dependent helicase [Trichonephila inaurata madagascariensis]
OG0003826	23.59	intensification	0	0	40S ribosomal protein S14 [Trichonephila inaurata madagascariensis]
OG0003830	22.1	intensification	0	0	40S ribosomal protein S9 [Trichonephila inaurata madagascariensis]
OG0004291	8.28	intensification	0	0	DNA damage-binding protein 1 [Trichonephila inaurata madagascariensis]
OG0004305	2.2	intensification	0	0	hypothetical protein TNIN_457701 [Trichonephila inaurata madagascariensis]
OG0004319	1.88	intensification	0	0	rho GTPase-activating protein 45 [Trichonephila inaurata madagascariensis]
OG0004342	2.15	intensification	0	0	homeobox protein TGIF1 [Trichonephila inaurata madagascariensis]
OG0004381	13.15	intensification	0	0	EF-hand domain-containing protein [Trichonephila inaurata madagascariensis]
OG0004438	5.13	intensification	0	0	coiled-coil domain-containing protein CG32809 [Trichonephila inaurata madagascariensis]
OG0004467	50	intensification	0	0	KAT8 regulatory NSL complex subunit 1-like protein, partial [Trichonephila inaurata madagascariensis]
OG0004475	6.92	intensification	0	0	lysophosphatidylserine lipase ABHD12 [Trichonephila inaurata madagascariensis]
OG0004567	50	intensification	0	0	heterogeneous nuclear ribonucleoprotein Q [Trichonephila inaurata madagascariensis]
OG0004685	7.27	intensification	0	0	cullin-4B [Trichonephila inaurata madagascariensis]
OG0004686	35.33	intensification	0	0	methionine--tRNA ligase, cytoplasmic [Trichonephila inaurata madagascariensis]
OG0004739	8.45	intensification	0	0	nicalin-1 [Trichonephila inaurata madagascariensis]
OG0004778	8.69	intensification	0	0	major facilitator superfamily domain-containing protein 4A [Trichonephila inaurata madagascariensis]
OG0004818	9.14	intensification	0	0	e3 ubiquitin-protein ligase MARCHF8 [Trichonephila inaurata madagascariensis]
OG0004883	6.07	intensification	0	0	nuclear pore complex protein Nup133 [Trichonephila inaurata madagascariensis]
OG0004974	34.62	intensification	0	0	anaphase-promoting complex subunit 4 [Trichonephila inaurata madagascariensis]
OG0005080	25.54	intensification	0	0	protein 5NUC [Includes: UDP-sugar hydrolase, partial [Trichonephila inaurata madagascariensis]
OG0005207	5.49	intensification	0	0	hypothetical protein TNIN_24191 [Trichonephila inaurata madagascariensis]
OG0005365	20.37	intensification	0	0	nucleoporin p54 [Trichonephila inaurata madagascariensis]
OG0005917	7.53	intensification	0	0	60S ribosomal protein L18 [Trichonephila inaurata madagascariensis]
OG0006101	6.42	intensification	0	0	actin-binding Rho-activating protein [Trichonephila inaurata madagascariensis]
OG0006193	23.04	intensification	0	0	ninjurin-1 [Trichonephila inaurata madagascariensis]
OG0006886	2.4	intensification	0	0	regulator of nonsense transcripts 1 [Trichonephila inaurata madagascariensis]
OG0006887	7.03	intensification	0	0	MOG interacting and ectopic P-granules protein 1 [Trichonephila inaurata madagascariensis]
OG0006936	5.54	intensification	0	0	glycolipid transfer protein [Trichonephila inaurata madagascariensis]
OG0006957	3.88	intensification	0	0	alpha-1,3-mannosyl-glycoprotein 2-beta-N-acetylglucosaminyltransferase [Trichonephila inaurata madagascariensis]
OG0006962	15.61	intensification	0	0	tetratricopeptide repeat protein 38 [Trichonephila inaurata madagascariensis]
OG0006999	15.57	intensification	0	0	structural maintenance of chromosomes protein 3 [Trichonephila inaurata madagascariensis]
OG0007031	10.49	intensification	0	0	oxysterol-binding protein 1 [Trichonephila inaurata madagascariensis]
OG0007058	11.89	intensification	0	0	TBC1 domain family member 4 [Trichonephila inaurata madagascariensis]
OG0007095	10.05	intensification	0	0	chitin-binding type-2 domain-containing protein [Trichonephila inaurata madagascariensis]
OG0007105	50	intensification	0	0	hypothetical protein TNIN_44851 [Trichonephila inaurata madagascariensis]
OG0007121	7.35	intensification	0	0	brain-specific angiogenesis inhibitor 1-associated protein 2 [Trichonephila inaurata madagascariensis]
OG0007189	9.01	intensification	0	0	[Pyruvate dehydrogenase [Trichonephila inaurata madagascariensis]
OG0007317	48.97	intensification	0	0	zinc transporter 2 [Trichonephila inaurata madagascariensis]
OG0007350	4.83	intensification	0	0	splicing factor 3B subunit 3 [Trichonephila inaurata madagascariensis]
OG0007533	3.22	intensification	0	0	mediator of RNA polymerase II transcription subunit 25 [Trichonephila inaurata madagascariensis]
OG0007599	17.89	intensification	0	0	transposable element Hobo transposase [Trichonephila inaurata madagascariensis]
OG0007783	7.46	intensification	0	0	glycosylated lysosomal membrane protein [Trichonephila inaurata madagascariensis]
OG0007959	5.15	intensification	0	0	uncharacterized protein TNIN_413751 [Trichonephila inaurata madagascariensis]
OG0007999	12.92	intensification	0	0	trifunctional enzyme subunit alpha, mitochondrial [Trichonephila inaurata madagascariensis]
OG0008171	2.28	intensification	0	0	nucleolar protein 14 [Trichonephila inaurata madagascariensis]
OG0008173	39.75	intensification	0	0	ATP-binding cassette sub-family G member 5 [Trichonephila inaurata madagascariensis]
OG0008394	6.63	intensification	0	0	e3 ubiquitin-protein transferase MAEA [Trichonephila inaurata madagascariensis]
OG0008397	25.83	intensification	0	0	2-hydroxyacyl-CoA lyase 1 [Trichonephila inaurata madagascariensis]
OG0008488	2.57	intensification	0	0	fatty-acid amide hydrolase 2 [Trichonephila inaurata madagascariensis]
OG0008500	24.57	intensification	0	0	DET1 homolog [Trichonephila inaurata madagascariensis]
OG0008763	8.27	intensification	0	0	UBX domain-containing protein 4 [Trichonephila inaurata madagascariensis]
OG0008880	11.79	intensification	0	0	hypothetical protein TNIN_429371 [Trichonephila inaurata madagascariensis]
OG0009007	50	intensification	0	0	hypothetical protein TNIN_390621 [Trichonephila inaurata madagascariensis]
OG0009091	27.07	intensification	0	0	hypothetical protein TNIN_436661 [Trichonephila inaurata madagascariensis]
OG0009140	12.64	intensification	0	0	sorting nexin-32 [Trichonephila inaurata madagascariensis]
OG0009360	50	intensification	0	0	aquaporin AQPAe.a [Trichonephila inaurata madagascariensis]
OG0009396	48.57	intensification	0	0	protein deadpan [Trichonephila inaurata madagascariensis]
OG0009454	3.69	intensification	0	0	glutamate-rich WD repeat-containing protein 1 [Trichonephila inaurata madagascariensis]
OG0009564	28.77	intensification	0	0	protein YIPF1 [Trichonephila inaurata madagascariensis]
OG0010002	10.8	intensification	0	0	mitochondrial tRNA-specific 2-thiouridylase 1 [Trichonephila inaurata madagascariensis]
OG0010007	8.76	intensification	0	0	ankyrin repeat domain-containing protein 13C [Trichonephila inaurata madagascariensis]
OG0010084	28.83	intensification	0	0	endothelial differentiation-related factor 1 [Trichonephila inaurata madagascariensis]
OG0010242	12.31	intensification	0	0	eukaryotic translation initiation factor 3 subunit F [Trichonephila inaurata madagascariensis]
OG0010444	13.54	intensification	0	0	RNA-binding protein 8A [Trichonephila inaurata madagascariensis]
OG0010488	50	intensification	0	0	eukaryotic translation initiation factor 3 subunit K [Trichonephila inaurata madagascariensis]
OG0010888	6.64	intensification	0	0	60S ribosomal protein L14 [Trichonephila inaurata madagascariensis]
OG0001430	2.25	intensification	0.0001	0.00257417	PI-PLC X domain-containing protein 3 [Trichonephila inaurata madagascariensis]
OG0001723	4.16	intensification	0.0001	0.00257417	cip1-interacting zinc finger protein [Trichonephila inaurata madagascariensis]
OG0003625	32.78	intensification	0.0001	0.00257417	26S proteasome regulatory subunit 6B [Trichonephila inaurata madagascariensis]
OG0003748	4.48	intensification	0.0001	0.00257417	ankyrin repeat and LEM domain-containing protein 2 [Trichonephila inaurata madagascariensis]
OG0004364	2.18	intensification	0.0001	0.00257417	exportin-1 [Trichonephila inaurata madagascariensis]
OG0004366	49.92	intensification	0.0001	0.00257417	catenin alpha [Trichonephila inaurata madagascariensis]
OG0004377	3.7	intensification	0.0001	0.00257417	homocysteine-responsive endoplasmic reticulum-resident ubiquitin-like domain member 2 protein [Trichonephila inaurata madagascariensis]
OG0004524	8.86	intensification	0.0001	0.00257417	RUN and FYVE domain-containing protein 2 [Trichonephila inaurata madagascariensis]
OG0005023	50	intensification	0.0001	0.00257417	rhomboid-related protein 3 [Trichonephila inaurata madagascariensis]
OG0005465	7.87	intensification	0.0001	0.00257417	tubulointerstitial nephritis antigen-like [Trichonephila inaurata madagascariensis]
OG0005677	50	intensification	0.0001	0.00257417	mesoderm induction early response protein 1 [Trichonephila inaurata madagascariensis]
OG0006870	7.49	intensification	0.0001	0.00257417	CCR4-NOT transcription complex subunit 3 [Trichonephila inaurata madagascariensis]
OG0007234	21.01	intensification	0.0001	0.00257417	proton channel OtopLc [Trichonephila inaurata madagascariensis]
OG0007346	3.9	intensification	0.0001	0.00257417	suppressor of cytokine signaling 5 [Trichonephila inaurata madagascariensis]
OG0007930	2.42	intensification	0.0001	0.00257417	secretory carrier-associated membrane protein 1 [Trichonephila inaurata madagascariensis]
OG0008489	37.62	intensification	0.0001	0.00257417	alpha-1,2-mannosyltransferase ALG9 [Trichonephila inaurata madagascariensis]
OG0008637	31.97	intensification	0.0001	0.00257417	uncharacterized protein TNCV_4177151 [Trichonephila clavipes]
OG0008713	22.86	intensification	0.0001	0.00257417	cathepsin O [Trichonephila inaurata madagascariensis]
OG0009377	2.31	intensification	0.0001	0.00257417	transcriptional adapter 2-alpha [Trichonephila inaurata madagascariensis]
OG0010286	3.67	intensification	0.0001	0.00257417	28S ribosomal protein S2, mitochondrial [Trichonephila inaurata madagascariensis]
OG0010449	3.68	intensification	0.0001	0.00257417	UPF0705 protein C11orf49 [Trichonephila inaurata madagascariensis]
OG0001132	1.93	intensification	0.0002	0.00450065	60S ribosomal protein L9 [Trichonephila inaurata madagascariensis]
OG0001785	3.04	intensification	0.0002	0.00450065	agmatinase, mitochondrial [Trichonephila inaurata madagascariensis]
OG0002182	15.54	intensification	0.0002	0.00450065	splicing factor 3B subunit 1 [Trichonephila inaurata madagascariensis]
OG0002234	4.41	intensification	0.0002	0.00450065	splicing factor 1 [Trichonephila inaurata madagascariensis]
OG0002343	50	intensification	0.0002	0.00450065	vacuole membrane protein 1 [Trichonephila inaurata madagascariensis]
OG0002954	38.96	intensification	0.0002	0.00450065	protein C15orf41 homolog [Trichonephila inaurata madagascariensis]
OG0004767	1.62	intensification	0.0002	0.00450065	eukaryotic translation initiation factor 3 subunit C [Trichonephila inaurata madagascariensis]
OG0004875	2.61	intensification	0.0002	0.00450065	protein bicaudal D [Trichonephila inaurata madagascariensis]
OG0005039	30.72	intensification	0.0002	0.00450065	signal transducer and activator of transcription 5B [Trichonephila inaurata madagascariensis]
OG0005062	50	intensification	0.0002	0.00450065	periodic tryptophan protein 2 homolog [Trichonephila inaurata madagascariensis]
OG0005090	2.25	intensification	0.0002	0.00450065	hypothetical protein TNIN_366211 [Trichonephila inaurata madagascariensis]
OG0005095	2.89	intensification	0.0002	0.00450065	protein jagunal [Trichonephila inaurata madagascariensis]
OG0005497	23.18	intensification	0.0002	0.00450065	ras-related protein Rab-18 [Trichonephila inaurata madagascariensis]
OG0005628	10.1	intensification	0.0002	0.00450065	inhibitor of growth protein 4 [Trichonephila inaurata madagascariensis]
OG0005886	32.29	intensification	0.0002	0.00450065	trafficking protein particle complex subunit 5 [Trichonephila inaurata madagascariensis]
OG0005957	50	intensification	0.0002	0.00450065	RNA-binding protein MEX3B [Trichonephila inaurata madagascariensis]
OG0006857	50	intensification	0.0002	0.00450065	poly(U)-binding-splicing factor PUF60 [Trichonephila inaurata madagascariensis]
OG0007132	2.98	intensification	0.0002	0.00450065	polyadenylate-binding protein-interacting protein 1 [Trichonephila inaurata madagascariensis]
OG0007194	3.56	intensification	0.0002	0.00450065	ran-binding protein 9 [Trichonephila inaurata madagascariensis]
OG0008887	38.71	intensification	0.0002	0.00450065	nuclear transcription factor Y subunit alpha [Trichonephila inaurata madagascariensis]
OG0009074	10.08	intensification	0.0002	0.00450065	MADF domain-containing protein [Trichonephila clavata]
OG0009533	26.1	intensification	0.0002	0.00450065	smad nuclear-interacting protein 1, partial [Trichonephila inaurata madagascariensis]
OG0009956	3.43	intensification	0.0002	0.00450065	toll-interacting protein [Trichonephila inaurata madagascariensis]
OG0010471	50	intensification	0.0002	0.00450065	DUF4817 domain-containing protein [Trichonephila clavipes]
OG0001470	16.88	intensification	0.0003	0.00622857	protein phosphatase 1G [Trichonephila inaurata madagascariensis]
OG0001643	15.86	intensification	0.0003	0.00622857	ABC transporter G family member 20 [Trichonephila inaurata madagascariensis]
OG0002235	17.91	intensification	0.0003	0.00622857	coatomer subunit beta' [Trichonephila inaurata madagascariensis]
OG0003608	27.35	intensification	0.0003	0.00622857	malonyl-CoA-acyl carrier protein transacylase, mitochondrial [Trichonephila inaurata madagascariensis]
OG0004630	8.37	intensification	0.0003	0.00622857	e3 ubiquitin-protein ligase RNF38 [Trichonephila inaurata madagascariensis]
OG0004672	50	intensification	0.0003	0.00622857	hypothetical protein TNIN_124311 [Trichonephila inaurata madagascariensis]
OG0006213	2.29	intensification	0.0003	0.00622857	hypothetical protein TNIN_414221 [Trichonephila inaurata madagascariensis]
OG0007280	50	intensification	0.0003	0.00622857	aquaporin-10 [Trichonephila inaurata madagascariensis]
OG0007322	5.22	intensification	0.0003	0.00622857	uncharacterized protein TNCV_2375171 [Trichonephila clavipes]
OG0008970	39.36	intensification	0.0003	0.00622857	splicing factor 3A subunit 3 [Trichonephila inaurata madagascariensis]
OG0009484	5.72	intensification	0.0003	0.00622857	uncharacterized protein TNCV_3781281 [Trichonephila clavipes]
OG0003660	50	intensification	0.0004	0.00792727	transposable element Tcb1 transposase [Trichonephila clavipes]
OG0004460	21.94	intensification	0.0004	0.00792727	large proline-rich protein BAG6 [Trichonephila inaurata madagascariensis]
OG0005440	12	intensification	0.0004	0.00792727	hypothetical protein TNIN_396981 [Trichonephila inaurata madagascariensis]
OG0006048	6.01	intensification	0.0004	0.00792727	cell growth-regulating nucleolar protein [Trichonephila inaurata madagascariensis]
OG0006871	2.05	intensification	0.0004	0.00792727	post-GPI attachment to proteins factor 3 [Trichonephila inaurata madagascariensis]
OG0008151	50	intensification	0.0004	0.00792727	stress-70 protein, mitochondrial [Trichonephila inaurata madagascariensis]
OG0001405	13.82	intensification	0.0005	0.00901292	solute carrier family 41 member 1 [Trichonephila inaurata madagascariensis]
OG0001805	50	intensification	0.0005	0.00901292	MARVEL domain-containing protein [Trichonephila inaurata madagascariensis]
OG0001847	48.3	intensification	0.0005	0.00901292	hypothetical protein TNIN_397712 [Trichonephila inaurata madagascariensis]
OG0003398	12.01	intensification	0.0005	0.00901292	ribosome biogenesis protein bop1, partial [Trichonephila inaurata madagascariensis]
OG0005790	3.96	intensification	0.0005	0.00901292	NKAP family protein CG6066 [Trichonephila inaurata madagascariensis]
OG0006218	23.81	intensification	0.0005	0.00901292	60S ribosomal protein L31 [Trichonephila inaurata madagascariensis]
OG0006965	4.98	intensification	0.0005	0.00901292	PHD finger protein 13 [Trichonephila inaurata madagascariensis]
OG0007677	50	intensification	0.0005	0.00901292	hypothetical protein TNIN_211281 [Trichonephila inaurata madagascariensis]
OG0008007	2.42	intensification	0.0005	0.00901292	protein-L-isoaspartate O-methyltransferase domain-containing protein 1 [Trichonephila inaurata madagascariensis]
OG0009134	21.57	intensification	0.0005	0.00901292	transducin beta-like protein 2 [Trichonephila inaurata madagascariensis]
OG0009238	26.79	intensification	0.0005	0.00901292	protein DDI1 homolog 2 [Trichonephila inaurata madagascariensis]
OG0009866	14.53	intensification	0.0005	0.00901292	rho-related GTP-binding protein RhoU [Trichonephila inaurata madagascariensis]
OG0010308	50	intensification	0.0005	0.00901292	ADP-ribosylation factor-like protein 2 [Trichonephila inaurata madagascariensis]
OG0010800	4.87	intensification	0.0005	0.00901292	NADH dehydrogenase 1 alpha subcomplex subunit 13 [Trichonephila inaurata madagascariensis]
OG0001385	2.12	intensification	0.0006	0.0104119	probable ATP-dependent RNA helicase DDX17 [Trichonephila inaurata madagascariensis]
OG0002073	50	intensification	0.0006	0.0104119	hypothetical protein TNIN_135931 [Trichonephila inaurata madagascariensis]
OG0004489	50	intensification	0.0006	0.0104119	protein held out wings [Trichonephila inaurata madagascariensis]
OG0004676	23.48	intensification	0.0006	0.0104119	protein sel-1 homolog 1 [Trichonephila inaurata madagascariensis]
OG0005804	44.44	intensification	0.0006	0.0104119	ribosome biogenesis protein NSA2 homolog [Trichonephila inaurata madagascariensis]
OG0010558	12.15	intensification	0.0006	0.0104119	hypothetical protein TNIN_257931 [Trichonephila inaurata madagascariensis]
OG0001109	6.25	intensification	0.0007	0.0117952	protein alan shepard [Trichonephila inaurata madagascariensis]
OG0004610	32.06	intensification	0.0007	0.0117952	hypothetical protein TNIN_216781 [Trichonephila inaurata madagascariensis]
OG0006009	3.27	intensification	0.0007	0.0117952	transcription initiation factor TFIID subunit 8, partial [Trichonephila inaurata madagascariensis]
OG0007400	8.4	intensification	0.0007	0.0117952	glycine--tRNA ligase [Trichonephila inaurata madagascariensis]
OG0007867	3.63	intensification	0.0007	0.0117952	lamin Dm0 [Trichonephila inaurata madagascariensis]
OG0008487	50	intensification	0.0007	0.0117952	u3 small nucleolar RNA-associated protein 14 homolog A [Trichonephila inaurata madagascariensis]
OG0009438	4.38	intensification	0.0007	0.0117952	replication stress response regulator SDE2 [Trichonephila inaurata madagascariensis]
OG0007079	3.03	intensification	0.0008	0.0131005	RING finger protein nhl-1 [Trichonephila inaurata madagascariensis]
OG0008010	50	intensification	0.0008	0.0131005	charged multivesicular body protein 2a [Trichonephila inaurata madagascariensis]
OG0009926	47.03	intensification	0.0008	0.0131005	UPF0547 protein C16orf87-like protein [Trichonephila inaurata madagascariensis]
OG0005279	50	intensification	0.0009	0.014367	t-complex protein 1 subunit eta [Trichonephila inaurata madagascariensis]
OG0006972	5.47	intensification	0.0009	0.014367	headcase protein [Trichonephila inaurata madagascariensis]
OG0007102	48.97	intensification	0.0009	0.014367	hypothetical protein TNIN_449361 [Trichonephila inaurata madagascariensis]
OG0007750	4.66	intensification	0.0009	0.014367	proline-rich protein PRCC [Trichonephila inaurata madagascariensis]
OG0008805	9.16	intensification	0.0009	0.014367	putative uncharacterized oxidoreductase YDR541C [Trichonephila inaurata madagascariensis]
OG0009047	26.73	intensification	0.0009	0.014367	WD repeat-containing protein 82 [Trichonephila inaurata madagascariensis]
OG0005030	2.53	intensification	0.001	0.0155022	brahma-associated protein of 60 kDa [Trichonephila inaurata madagascariensis]
OG0005569	15.47	intensification	0.001	0.0155022	26S proteasome regulatory subunit 4 [Trichonephila inaurata madagascariensis]
OG0006903	15.5	intensification	0.001	0.0155022	hypothetical protein TNIN_500791 [Trichonephila inaurata madagascariensis]
OG0007300	3.32	intensification	0.001	0.0155022	angiomotin [Trichonephila inaurata madagascariensis]
OG0007774	50	intensification	0.001	0.0155022	vascular endothelial growth factor A [Trichonephila inaurata madagascariensis]
OG0009224	20.88	intensification	0.001	0.0155022	ribosome production factor 1 [Trichonephila inaurata madagascariensis]
OG0009614	13.66	intensification	0.001	0.0155022	protein-S-isoprenylcysteine O-methyltransferase [Trichonephila inaurata madagascariensis]
OG0009885	4.01	intensification	0.001	0.0155022	mitochondrial cardiolipin hydrolase [Trichonephila inaurata madagascariensis]
OG0001418	20.2	intensification	0.0011	0.0166456	dimethylaniline monooxygenase 5 [Trichonephila inaurata madagascariensis]
OG0004921	6.23	intensification	0.0011	0.0166456	casein kinase I isoform epsilon [Trichonephila inaurata madagascariensis]
OG0005099	10.35	intensification	0.0011	0.0166456	BRCA1-associated protein [Trichonephila inaurata madagascariensis]
OG0007070	2.82	intensification	0.0011	0.0166456	MAGUK p55 subfamily member 5 [Trichonephila inaurata madagascariensis]
OG0009532	20.14	intensification	0.0011	0.0166456	ATPase family AAA domain-containing protein 1-B [Trichonephila inaurata madagascariensis]
OG0000943	2.85	intensification	0.0012	0.0173676	glutamine--fructose-6-phosphate aminotransferase 2 [Trichonephila inaurata madagascariensis]
OG0002931	3.55	intensification	0.0012	0.0173676	zinc finger protein 608 [Trichonephila inaurata madagascariensis]
OG0002945	2.05	intensification	0.0012	0.0173676	double-stranded RNA-binding protein Staufen homolog 1 [Trichonephila inaurata madagascariensis]
OG0004605	43.26	intensification	0.0012	0.0173676	glucose transporter type 1 [Trichonephila inaurata madagascariensis]
OG0004845	1.67	intensification	0.0012	0.0173676	katanin p80 WD40 repeat-containing subunit B1 [Trichonephila inaurata madagascariensis]
OG0007602	12.2	intensification	0.0012	0.0173676	integrator complex subunit 8 [Trichonephila inaurata madagascariensis]
OG0002318	39.49	intensification	0.0013	0.0184325	heterogeneous nuclear ribonucleoprotein 27C [Trichonephila inaurata madagascariensis]
OG0003644	30.74	intensification	0.0013	0.0184325	lysine-specific demethylase 8 [Trichonephila inaurata madagascariensis]
OG0004358	2.97	intensification	0.0013	0.0184325	hypothetical protein TNIN_210881 [Trichonephila inaurata madagascariensis]
OG0007473	1.4	intensification	0.0013	0.0184325	carcinine transporter [Trichonephila inaurata madagascariensis]
OG0008004	3.34	intensification	0.0013	0.0184325	eukaryotic peptide chain release factor GTP-binding subunit ERF3A [Trichonephila inaurata madagascariensis]
OG0009732	50	intensification	0.0013	0.0184325	COP9 signalosome complex subunit 5 [Trichonephila inaurata madagascariensis]
OG0003262	28.43	intensification	0.0014	0.0195328	glyco_hydro_20b domain-containing protein [Trichonephila inaurata madagascariensis]
OG0004372	4.08	intensification	0.0014	0.0195328	uncharacterized protein ZK1073.1 [Trichonephila clavipes]
OG0004469	20.51	intensification	0.0014	0.0195328	vesicle-fusing ATPase 1 [Trichonephila inaurata madagascariensis]
OG0006846	3.78	intensification	0.0014	0.0195328	AP-3 complex subunit beta-1 [Trichonephila inaurata madagascariensis]
OG0008754	2.14	intensification	0.0014	0.0195328	uncharacterized protein TNCV_1790771 [Trichonephila clavipes]
OG0000614	3.3	intensification	0.0015	0.0204775	sorbin and SH3 domain-containing protein 1 [Trichonephila inaurata madagascariensis]
OG0002092	24.13	intensification	0.0015	0.0204775	endophilin-A [Trichonephila inaurata madagascariensis]
OG0003066	50	intensification	0.0015	0.0204775	peptide transporter family 1 [Trichonephila inaurata madagascariensis]
OG0006327	35.87	intensification	0.0015	0.0204775	coiled-coil domain-containing protein 86 [Trichonephila inaurata madagascariensis]
OG0006971	50	intensification	0.0015	0.0204775	respirasome Complex Assembly Factor 1 [Trichonephila inaurata madagascariensis]
OG0002289	50	intensification	0.0016	0.0213008	mediator of RNA polymerase II transcription subunit 21 [Trichonephila inaurata madagascariensis]
OG0002404	7.1	intensification	0.0016	0.0213008	fructose-bisphosphate aldolase A [Trichonephila inaurata madagascariensis]
OG0002897	3.8	intensification	0.0016	0.0213008	leucine-rich repeat flightless-interacting protein 2 [Trichonephila inaurata madagascariensis]
OG0003006	27.96	intensification	0.0016	0.0213008	hypothetical protein TNIN_272201 [Trichonephila inaurata madagascariensis]
OG0004276	3.61	intensification	0.0016	0.0213008	ras GTPase-activating protein-binding protein 2 [Trichonephila inaurata madagascariensis]
OG0004608	6.44	intensification	0.0016	0.0213008	wee1-like protein kinase [Trichonephila inaurata madagascariensis]
OG0008554	27.53	intensification	0.0016	0.0213008	kxDL motif-containing protein CG10681 [Trichonephila inaurata madagascariensis]
OG0009823	4.08	intensification	0.0016	0.0213008	r3H domain-containing protein 4 [Trichonephila inaurata madagascariensis]
OG0002479	2.98	intensification	0.0018	0.0234269	uncharacterized protein TNCV_1195731 [Trichonephila clavipes]
OG0005251	12.49	intensification	0.0018	0.0234269	pancreatic lipase-related protein 2 [Trichonephila inaurata madagascariensis]
OG0002963	3.28	intensification	0.0019	0.0244998	hypothetical protein TNIN_345281 [Trichonephila inaurata madagascariensis]
OG0007388	1.56	intensification	0.002	0.0255531	transcription elongation factor SPT5 [Trichonephila inaurata madagascariensis]
OG0007878	50	intensification	0.002	0.0255531	metastasis-associated protein MTA1 [Trichonephila inaurata madagascariensis]
OG0002651	3.11	intensification	0.0021	0.0263957	60S ribosomal protein L34, partial [Trichonephila inaurata madagascariensis]
OG0004791	31.65	intensification	0.0021	0.0263957	protein hu-li tai shao [Trichonephila inaurata madagascariensis]
OG0008136	10.83	intensification	0.0021	0.0263957	hypothetical protein TNIN_501091 [Trichonephila inaurata madagascariensis]
OG0010313	2.74	intensification	0.0021	0.0263957	mediator of RNA polymerase II transcription subunit 8 [Trichonephila inaurata madagascariensis]
OG0007206	46.58	intensification	0.0022	0.0274547	amidophosphoribosyltransferase [Trichonephila inaurata madagascariensis]
OG0007249	14.98	intensification	0.0023	0.0285495	elongin-A [Trichonephila inaurata madagascariensis]
OG0007874	7.96	intensification	0.0023	0.0285495	vacuolar protein sorting-associated protein 35 [Trichonephila inaurata madagascariensis]
OG0004509	2.14	intensification	0.0024	0.0289161	protein phosphatase PP2A 55 kDa regulatory subunit [Trichonephila inaurata madagascariensis]
OG0005309	18.6	intensification	0.0024	0.0289161	docking protein 1 [Trichonephila inaurata madagascariensis]
OG0007283	7.95	intensification	0.0024	0.0289161	nuclear hormone receptor E75 [Trichonephila inaurata madagascariensis]
OG0007726	5.97	intensification	0.0024	0.0289161	VHL domain-containing protein [Trichonephila inaurata madagascariensis]
OG0009835	10.8	intensification	0.0024	0.0289161	u43-Liphistoxin-Lth1a_1 [Trichonephila inaurata madagascariensis]
OG0001720	46.19	intensification	0.0025	0.0297611	uncharacterized protein TNIN_395992 [Trichonephila inaurata madagascariensis]
OG0005467	3.46	intensification	0.0025	0.0297611	cleavage stimulation factor subunit 2 [Trichonephila inaurata madagascariensis]
OG0005393	49.92	intensification	0.0026	0.0307939	uncharacterized protein TNCV_3881671 [Trichonephila clavipes]
OG0007806	7.58	intensification	0.0026	0.0307939	putative sodium-coupled neutral amino acid transporter 7 [Trichonephila inaurata madagascariensis]
OG0008830	9.63	intensification	0.0027	0.0318701	hexosaminidase D [Trichonephila inaurata madagascariensis]
OG0001502	16.54	intensification	0.0028	0.0327183	small nuclear ribonucleoprotein Sm D3 [Trichonephila inaurata madagascariensis]
OG0002433	2.27	intensification	0.0028	0.0327183	nuclear transcription factor Y subunit beta [Trichonephila inaurata madagascariensis]
OG0007275	13.59	intensification	0.0028	0.0327183	actin-interacting protein 1 [Trichonephila inaurata madagascariensis]
OG0010929	2.59	intensification	0.0028	0.0327183	transcription elongation factor SPT4 [Trichonephila inaurata madagascariensis]
OG0003055	2.75	intensification	0.0029	0.0333835	hypothetical protein TNIN_283952 [Trichonephila inaurata madagascariensis]
OG0010020	50	intensification	0.0029	0.0333835	aldo-keto reductase family 1 member A1 [Trichonephila inaurata madagascariensis]
OG0010044	5.01	intensification	0.0029	0.0333835	uncharacterized protein TNCV_3872791 [Trichonephila clavipes]
OG0000348	1.95	intensification	0.003	0.033974	astacin-like metalloprotease toxin 1 [Trichonephila inaurata madagascariensis]
OG0003719	15.4	intensification	0.003	0.033974	barrier-to-autointegration factor [Trichonephila inaurata madagascariensis]
OG0003873	26.08	intensification	0.0032	0.0358318	40S ribosomal protein S23 [Trichonephila inaurata madagascariensis]
OG0001350	6.25	intensification	0.0034	0.0377081	casein kinase II subunit alpha [Trichonephila inaurata madagascariensis]
OG0003381	1.84	intensification	0.0034	0.0377081	leucine-rich repeat-containing protein 49 [Trichonephila inaurata madagascariensis]
OG0004484	2.28	intensification	0.0034	0.0377081	e3 ubiquitin-protein ligase Su(dx) [Trichonephila inaurata madagascariensis]
OG0008557	8.44	intensification	0.0035	0.038511	suppressor of tumorigenicity 7 protein homolog [Trichonephila inaurata madagascariensis]
OG0005196	50	intensification	0.0036	0.03924	t-complex protein 1 subunit zeta [Trichonephila inaurata madagascariensis]
OG0008395	2.92	intensification	0.0037	0.0400795	putative RNA polymerase II nuclear localization protein SLC7A6OS [Trichonephila inaurata madagascariensis]
OG0010785	1.99	intensification	0.0037	0.0400795	40S ribosomal protein S10b [Trichonephila inaurata madagascariensis]
OG0009030	7.04	intensification	0.0039	0.0417276	methyl-CpG-binding domain protein 2 [Trichonephila inaurata madagascariensis]
OG0009212	3.48	intensification	0.0039	0.0417276	pre-mRNA-splicing factor RBM22 [Trichonephila inaurata madagascariensis]
OG0000702	26.09	intensification	0.004	0.0426015	LIM and SH3 domain protein F42H10.3 [Trichonephila inaurata madagascariensis]
OG0002395	12.35	intensification	0.004	0.0426015	dynamin [Trichonephila inaurata madagascariensis]
OG0002229	2.2	intensification	0.0041	0.0434015	hypothetical protein TNIN_206211 [Trichonephila inaurata madagascariensis]
OG0001627	50	intensification	0.0042	0.0440589	eukaryotic initiation factor 4A-II [Trichonephila inaurata madagascariensis]
OG0005314	16.46	intensification	0.0042	0.0440589	probable aminopeptidase NPEPL1 [Trichonephila inaurata madagascariensis]
OG0008175	28.08	intensification	0.0042	0.0440589	protein FAM177A1 [Trichonephila inaurata madagascariensis]
OG0010224	10.44	intensification	0.0042	0.0440589	uncharacterized protein TNCV_2894011 [Trichonephila clavipes]
OG0003913	13.83	intensification	0.0043	0.0448383	small nuclear ribonucleoprotein-associated protein B, partial [Trichonephila inaurata madagascariensis]
OG0001689	1.69	intensification	0.0044	0.0456762	exonuclease 3'-5' domain-containing protein 2 [Trichonephila inaurata madagascariensis]
OG0002096	2.1	intensification	0.0044	0.0456762	protein phosphatase Slingshot [Trichonephila inaurata madagascariensis]
OG0003111	1.65	intensification	0.0044	0.0456762	formin-binding protein 1 [Trichonephila inaurata madagascariensis]
OG0008915	11.89	intensification	0.0045	0.0463693	uncharacterized protein TNIN_478181 [Trichonephila inaurata madagascariensis]
OG0009878	12.72	intensification	0.0045	0.0463693	cell growth regulator with RING finger domain protein 1 [Trichonephila inaurata madagascariensis]
OG0003189	1.44	intensification	0.0046	0.0469146	nuclear receptor-binding protein [Trichonephila inaurata madagascariensis]
OG0005230	2.49	intensification	0.0046	0.0469146	uncharacterized protein TNCV_3582921 [Trichonephila clavipes]
OG0006748	1.93	intensification	0.0046	0.0469146	translocation protein SEC63 homolog [Trichonephila inaurata madagascariensis]
OG0010030	20.43	intensification	0.0046	0.0469146	NADH dehydrogenase flavoprotein 2, mitochondrial [Trichonephila inaurata madagascariensis]
OG0007255	3.73	intensification	0.0047	0.0477948	2-oxoglutarate dehydrogenase, mitochondrial [Trichonephila inaurata madagascariensis]
OG0006277	50	intensification	0.0048	0.0485287	hypothetical protein TNIN_207701 [Trichonephila inaurata madagascariensis]
OG0006961	3.21	intensification	0.0048	0.0485287	cyclic AMP-responsive element-binding protein 3-like protein 4, partial [Trichonephila inaurata madagascariensis]
OG0007394	50	intensification	0.0048	0.0485287	NAD-dependent protein deacetylase sirtuin-7 [Trichonephila inaurata madagascariensis]
OG0007670	50	intensification	0.005	0.0498286	116 kDa U5 small nuclear ribonucleoprotein component [Trichonephila inaurata madagascariensis]
OG0010223	6.85	intensification	0.005	0.0498286	26S proteasome non-ATPase regulatory subunit 9 [Trichonephila inaurata madagascariensis]
OG0000422	0.07	relaxation	0	0	hypothetical protein TNIN_421601 [Trichonephila inaurata madagascariensis]
OG0000635	0	relaxation	0	0	troponin I [Trichonephila inaurata madagascariensis]
OG0001144	0.19	relaxation	0	0	zinc metalloproteinase nas-15 [Trichonephila inaurata madagascariensis]
OG0001429	0.4	relaxation	0	0	alcohol dehydrogenase class-3 [Trichonephila inaurata madagascariensis]
OG0001454	0.11	relaxation	0	0	mortality factor 4-like protein 1 [Trichonephila inaurata madagascariensis]
OG0001711	0.33	relaxation	0	0	scaffold attachment factor B2 [Trichonephila inaurata madagascariensis]
OG0002495	0.46	relaxation	0	0	hypothetical protein TNIN_16801 [Trichonephila inaurata madagascariensis]
OG0003190	0.33	relaxation	0	0	nuclear factor NF-kappa-B p110 subunit [Trichonephila inaurata madagascariensis]
OG0003223	0.43	relaxation	0	0	probable acyl-CoA dehydrogenase 6 [Trichonephila inaurata madagascariensis]
OG0004454	0.37	relaxation	0	0	lateral signaling target protein 2 homolog [Trichonephila inaurata madagascariensis]
OG0004699	0	relaxation	0	0	ubiquitin carboxyl-terminal hydrolase 46 [Trichonephila inaurata madagascariensis]
OG0005075	0.1	relaxation	0	0	hypothetical protein TNIN_149981 [Trichonephila inaurata madagascariensis]
OG0005133	0.01	relaxation	0	0	palmitoyltransferase ZDHHC2 [Trichonephila inaurata madagascariensis]
OG0005218	0.09	relaxation	0	0	malate dehydrogenase, cytoplasmic [Trichonephila inaurata madagascariensis]
OG0005304	0.08	relaxation	0	0	uncharacterized protein TNCV_1259091 [Trichonephila clavipes]
OG0005311	0	relaxation	0	0	6-phosphogluconate dehydrogenase, decarboxylating [Trichonephila inaurata madagascariensis]
OG0005341	0	relaxation	0	0	retinoblastoma-binding protein 5 homolog [Trichonephila inaurata madagascariensis]
OG0005390	0.11	relaxation	0	0	dnaJ homolog subfamily C member 22 [Trichonephila inaurata madagascariensis]
OG0005871	0	relaxation	0	0	protein OSCP1 [Trichonephila inaurata madagascariensis]
OG0005926	0	relaxation	0	0	diphthine methyl ester synthase [Trichonephila inaurata madagascariensis]
OG0006026	0.01	relaxation	0	0	protein max [Trichonephila inaurata madagascariensis]
OG0006822	0	relaxation	0	0	stromal membrane-associated protein 1 [Trichonephila inaurata madagascariensis]
OG0007077	0.45	relaxation	0	0	ATPase family AAA domain-containing protein 3-A [Trichonephila inaurata madagascariensis]
OG0007208	0	relaxation	0	0	secretory carrier-associated membrane protein 1 [Trichonephila inaurata madagascariensis]
OG0007273	0.33	relaxation	0	0	importin-9 [Trichonephila inaurata madagascariensis]
OG0007463	0.46	relaxation	0	0	staphylococcal nuclease domain-containing protein 1 [Trichonephila inaurata madagascariensis]
OG0007506	0	relaxation	0	0	hypothetical protein TNIN_387201 [Trichonephila inaurata madagascariensis]
OG0008001	0.42	relaxation	0	0	protein argonaute-2 [Trichonephila inaurata madagascariensis]
OG0008101	0.12	relaxation	0	0	apoptosis inhibitor 5 [Trichonephila inaurata madagascariensis]
OG0008229	0	relaxation	0	0	ATP-binding cassette sub-family F member 3 [Trichonephila inaurata madagascariensis]
OG0008288	0.3	relaxation	0	0	hypothetical protein TNIN_64961 [Trichonephila inaurata madagascariensis]
OG0008483	0	relaxation	0	0	n-acetylgalactosamine-6-sulfatase [Trichonephila inaurata madagascariensis]
OG0008616	0.27	relaxation	0	0	protein FAM210B, mitochondrial [Trichonephila inaurata madagascariensis]
OG0008841	0	relaxation	0	0	nucleolar protein 56 [Trichonephila inaurata madagascariensis]
OG0009225	0.36	relaxation	0	0	28S ribosomal protein S9, mitochondrial [Trichonephila inaurata madagascariensis]
OG0009288	0	relaxation	0	0	threonine aspartase 1 [Trichonephila inaurata madagascariensis]
OG0009289	0.38	relaxation	0	0	hypothetical protein TNIN_440711 [Trichonephila inaurata madagascariensis]
OG0009441	0.38	relaxation	0	0	cysteine and histidine-rich protein 1-B [Trichonephila inaurata madagascariensis]
OG0009463	0.05	relaxation	0	0	nitric oxide synthase-interacting protein [Trichonephila inaurata madagascariensis]
OG0009840	0.25	relaxation	0	0	laminin subunit alpha-2 [Trichonephila inaurata madagascariensis]
OG0010161	0.2	relaxation	0	0	mitotic spindle assembly checkpoint protein MAD2A [Trichonephila inaurata madagascariensis]
OG0010163	0.26	relaxation	0	0	uncharacterized protein TNCV_3839501 [Trichonephila clavipes]
OG0010663	0	relaxation	0	0	GTP-binding protein RAD [Trichonephila inaurata madagascariensis]
OG0010942	0.11	relaxation	0	0	39S ribosomal protein L52 [Trichonephila inaurata madagascariensis]
OG0010982	0	relaxation	0	0	frizzled-1 [Trichonephila inaurata madagascariensis]
OG0000790	0.18	relaxation	0.0001	0.00257417	dynamin-2 [Trichonephila inaurata madagascariensis]
OG0001860	0.51	relaxation	0.0001	0.00257417	methyltransferase DDB_G0268948 [Trichonephila inaurata madagascariensis]
OG0002218	0.13	relaxation	0.0001	0.00257417	tolloid-like protein 1 [Trichonephila inaurata madagascariensis]
OG0002250	0.22	relaxation	0.0001	0.00257417	ran GTPase-activating protein 1 [Trichonephila inaurata madagascariensis]
OG0002267	0.01	relaxation	0.0001	0.00257417	DNA-binding protein SMUBP-2 [Trichonephila inaurata madagascariensis]
OG0002366	0.43	relaxation	0.0001	0.00257417	YEATS domain-containing protein 4 [Trichonephila inaurata madagascariensis]
OG0003203	0.29	relaxation	0.0001	0.00257417	uncharacterized protein TNCV_3320701 [Trichonephila clavipes]
OG0005066	0.53	relaxation	0.0001	0.00257417	uncharacterized protein KIAA2013 homolog [Trichonephila clavipes]
OG0005190	0.31	relaxation	0.0001	0.00257417	e3 ubiquitin-protein ligase RNF167 [Trichonephila inaurata madagascariensis]
OG0005205	0.31	relaxation	0.0001	0.00257417	hypothetical protein TNIN_484161 [Trichonephila inaurata madagascariensis]
OG0005578	0.49	relaxation	0.0001	0.00257417	centrosomal protein of 41 kDa B [Trichonephila inaurata madagascariensis]
OG0006136	0.49	relaxation	0.0001	0.00257417	merlin [Trichonephila inaurata madagascariensis]
OG0006807	0.6	relaxation	0.0001	0.00257417	septin-1 [Trichonephila inaurata madagascariensis]
OG0007933	0.37	relaxation	0.0001	0.00257417	zinc finger BED domain-containing protein 1 [Trichonephila inaurata madagascariensis]
OG0008908	0.39	relaxation	0.0001	0.00257417	ubiquinone biosynthesis monooxygenase COQ6, mitochondrial [Trichonephila inaurata madagascariensis]
OG0008914	0.63	relaxation	0.0001	0.00257417	MFS-type transporter SLC18B1 [Trichonephila inaurata madagascariensis]
OG0009478	0.32	relaxation	0.0001	0.00257417	phenylalanine--tRNA ligase, mitochondrial [Trichonephila inaurata madagascariensis]
OG0009857	0.04	relaxation	0.0001	0.00257417	RNA transcription, translation and transport factor protein [Trichonephila inaurata madagascariensis]
OG0007304	0.38	relaxation	0.0002	0.00450065	hydroxyproline dehydrogenase [Trichonephila inaurata madagascariensis]
OG0008291	0.57	relaxation	0.0002	0.00450065	myotubularin-related protein 9 [Trichonephila inaurata madagascariensis]
OG0008473	0.15	relaxation	0.0002	0.00450065	transcriptional regulator ovo [Trichonephila inaurata madagascariensis]
OG0001752	0.05	relaxation	0.0003	0.00622857	mitochondrial E3 ubiquitin protein ligase 1 [Trichonephila inaurata madagascariensis]
OG0002481	0.17	relaxation	0.0003	0.00622857	arrestin domain-containing protein 4 [Trichonephila inaurata madagascariensis]
OG0005669	0.08	relaxation	0.0003	0.00622857	NIF3-like protein 1 [Trichonephila inaurata madagascariensis]
OG0007788	0	relaxation	0.0003	0.00622857	uncharacterized protein TNCV_345551 [Trichonephila clavipes]
OG0009830	0.33	relaxation	0.0003	0.00622857	hypothetical protein TNIN_374601 [Trichonephila inaurata madagascariensis]
OG0005253	0.56	relaxation	0.0004	0.00792727	major facilitator superfamily domain-containing protein 1 [Trichonephila inaurata madagascariensis]
OG0005268	0.43	relaxation	0.0004	0.00792727	phenoloxidase-activating factor 1 [Trichonephila inaurata madagascariensis]
OG0007247	0.53	relaxation	0.0004	0.00792727	RRP12-like protein [Trichonephila inaurata madagascariensis]
OG0009702	0.22	relaxation	0.0004	0.00792727	cytoplasmic protein NCK1 [Trichonephila inaurata madagascariensis]
OG0000449	0.53	relaxation	0.0005	0.00901292	tumor protein 63 [Trichonephila inaurata madagascariensis]
OG0001001	0.32	relaxation	0.0005	0.00901292	ethanol acetyltransferase 1 [Trichonephila inaurata madagascariensis]
OG0001395	0.52	relaxation	0.0005	0.00901292	hypothetical protein TNIN_347711 [Trichonephila inaurata madagascariensis]
OG0001751	0.31	relaxation	0.0005	0.00901292	transcription termination factor 1 [Trichonephila inaurata madagascariensis]
OG0004846	0.66	relaxation	0.0005	0.00901292	general transcription factor 3C polypeptide 3 [Trichonephila inaurata madagascariensis]
OG0008230	0.54	relaxation	0.0005	0.00901292	sn1-specific diacylglycerol lipase alpha [Trichonephila inaurata madagascariensis]
OG0008289	0.47	relaxation	0.0005	0.00901292	hypothetical protein TNIN_264471 [Trichonephila inaurata madagascariensis]
OG0008756	0.48	relaxation	0.0005	0.00901292	metalloendopeptidase OMA1, mitochondrial [Trichonephila inaurata madagascariensis]
OG0009077	0.29	relaxation	0.0005	0.00901292	zinc finger protein 277 [Trichonephila inaurata madagascariensis]
OG0009786	0.04	relaxation	0.0005	0.00901292	SUMO-activating enzyme subunit 1 [Trichonephila inaurata madagascariensis]
OG0010666	0.45	relaxation	0.0005	0.00901292	fumarylacetoacetase [Trichonephila inaurata madagascariensis]
OG0010803	0	relaxation	0.0005	0.00901292	small integral membrane protein 20 [Trichonephila inaurata madagascariensis]
OG0008282	0.5	relaxation	0.0006	0.0104119	WD repeat-containing protein 70 [Trichonephila inaurata madagascariensis]
OG0003176	0.51	relaxation	0.0007	0.0117952	ATP-dependent RNA helicase me31b [Trichonephila inaurata madagascariensis]
OG0005699	0.34	relaxation	0.0007	0.0117952	uncharacterized protein TNCV_2994171 [Trichonephila clavipes]
OG0009163	0.6	relaxation	0.0007	0.0117952	protoheme IX farnesyltransferase, mitochondrial [Trichonephila inaurata madagascariensis]
OG0000912	0.51	relaxation	0.0008	0.0131005	protein kinase C and casein kinase substrate in neurons protein 1 [Trichonephila inaurata madagascariensis]
OG0001148	0.48	relaxation	0.0008	0.0131005	uncharacterized protein TNCV_3813811 [Trichonephila clavipes]
OG0007535	0.56	relaxation	0.0008	0.0131005	hypothetical protein TNIN_392551 [Trichonephila inaurata madagascariensis]
OG0008913	0.6	relaxation	0.0008	0.0131005	clusterin-associated protein 1 [Trichonephila inaurata madagascariensis]
OG0005619	0.37	relaxation	0.0009	0.014367	aminomethyltransferase, mitochondrial [Trichonephila inaurata madagascariensis]
OG0010541	0	relaxation	0.0009	0.014367	ubiquitin-fold modifier-conjugating enzyme 1 [Trichonephila inaurata madagascariensis]
OG0004418	0.16	relaxation	0.001	0.0155022	uridine-cytidine kinase 2 [Trichonephila inaurata madagascariensis]
OG0004439	0.54	relaxation	0.001	0.0155022	hypothetical protein TNIN_487161 [Trichonephila inaurata madagascariensis]
OG0004663	0.5	relaxation	0.001	0.0155022	NADPH oxidase 5 [Trichonephila inaurata madagascariensis]
OG0002426	0	relaxation	0.0012	0.0173676	nucleolysin TIAR [Trichonephila inaurata madagascariensis]
OG0003148	0.56	relaxation	0.0012	0.0173676	f-box DNA helicase 1 [Trichonephila inaurata madagascariensis]
OG0003663	0.35	relaxation	0.0012	0.0173676	zinc finger MYND domain-containing protein 19 [Trichonephila inaurata madagascariensis]
OG0005299	0.14	relaxation	0.0012	0.0173676	RING-type E3 ubiquitin-protein ligase PPIL2, partial [Trichonephila inaurata madagascariensis]
OG0005417	0.51	relaxation	0.0012	0.0173676	protoporphyrinogen oxidase [Trichonephila inaurata madagascariensis]
OG0007645	0.61	relaxation	0.0012	0.0173676	histone deacetylase 3 [Trichonephila inaurata madagascariensis]
OG0009625	0.47	relaxation	0.0012	0.0173676	replication factor C subunit 3 [Trichonephila inaurata madagascariensis]
OG0010615	0.24	relaxation	0.0012	0.0173676	uncharacterized protein TNCV_2699921 [Trichonephila clavipes]
OG0009979	0.37	relaxation	0.0013	0.0184325	hypothetical protein TNIN_348511 [Trichonephila inaurata madagascariensis]
OG0000180	0.64	relaxation	0.0014	0.0195328	hypothetical protein TNIN_305551 [Trichonephila inaurata madagascariensis]
OG0003185	0.48	relaxation	0.0014	0.0195328	tetraspanin-31 [Trichonephila inaurata madagascariensis]
OG0003169	0.47	relaxation	0.0015	0.0204775	5'-3' exoribonuclease 2 [Trichonephila inaurata madagascariensis]
OG0005635	0.5	relaxation	0.0015	0.0204775	carnosine N-methyltransferase [Trichonephila inaurata madagascariensis]
OG0008064	0.31	relaxation	0.0015	0.0204775	hypothetical protein TNIN_381891 [Trichonephila inaurata madagascariensis]
OG0008785	0.55	relaxation	0.0015	0.0204775	probable ATP-dependent RNA helicase DDX52 [Trichonephila inaurata madagascariensis]
OG0009690	0	relaxation	0.0015	0.0204775	developmentally-regulated GTP-binding protein 2 [Trichonephila inaurata madagascariensis]
OG0005859	0.43	relaxation	0.0016	0.0213008	solute carrier family 66 member 2 [Trichonephila inaurata madagascariensis]
OG0005907	0.24	relaxation	0.0016	0.0213008	feline leukemia virus subgroup C receptor-related protein 1 [Trichonephila inaurata madagascariensis]
OG0008491	0.25	relaxation	0.0016	0.0213008	isocitrate dehydrogenase cytoplasmic [Trichonephila inaurata madagascariensis]
OG0008457	0.31	relaxation	0.0017	0.0223758	uncharacterized protein TNCV_3474981 [Trichonephila clavipes]
OG0010338	0	relaxation	0.0017	0.0223758	hypothetical protein TNIN_368081 [Trichonephila inaurata madagascariensis]
OG0002288	0.03	relaxation	0.0018	0.0234269	protein misato homolog 1 [Trichonephila inaurata madagascariensis]
OG0008934	0	relaxation	0.0018	0.0234269	stomatin-like protein 2, mitochondrial [Trichonephila inaurata madagascariensis]
OG0009501	0.39	relaxation	0.0018	0.0234269	UPF0415 protein C7orf25 homolog [Trichonephila inaurata madagascariensis]
OG0010718	0	relaxation	0.0019	0.0244998	28S ribosomal protein S18c, mitochondrial [Trichonephila inaurata madagascariensis]
OG0004556	0.55	relaxation	0.0021	0.0263957	hypothetical protein TNIN_18271 [Trichonephila inaurata madagascariensis]
OG0008888	0.03	relaxation	0.0022	0.0274547	transmembrane protein 33 [Trichonephila inaurata madagascariensis]
OG0008991	0.33	relaxation	0.0022	0.0274547	pentatricopeptide repeat-containing protein 2, mitochondrial [Trichonephila inaurata madagascariensis]
OG0000724	0	relaxation	0.0024	0.0289161	astacin-like metalloprotease toxin 1 [Trichonephila inaurata madagascariensis]
OG0000958	0.7	relaxation	0.0024	0.0289161	rac GTPase-activating protein 1 [Trichonephila inaurata madagascariensis]
OG0002269	0.23	relaxation	0.0024	0.0289161	DNA repair protein RAD51 homolog 4 [Trichonephila inaurata madagascariensis]
OG0002896	0.4	relaxation	0.0024	0.0289161	bifunctional 3'-phosphoadenosine 5'-phosphosulfate synthase [Trichonephila inaurata madagascariensis]
OG0004491	0.82	relaxation	0.0024	0.0289161	vigilin [Trichonephila inaurata madagascariensis]
OG0004762	0.5	relaxation	0.0024	0.0289161	hypothetical protein TNIN_251341 [Trichonephila inaurata madagascariensis]
OG0004788	0.11	relaxation	0.0024	0.0289161	hypothetical protein TNIN_235901 [Trichonephila inaurata madagascariensis]
OG0008405	0.53	relaxation	0.0024	0.0289161	serine palmitoyltransferase 1 [Trichonephila inaurata madagascariensis]
OG0008481	0.62	relaxation	0.0024	0.0289161	arylsulfatase B [Trichonephila inaurata madagascariensis]
OG0006222	0.22	relaxation	0.0025	0.0297611	uncharacterized protein TNCV_4773011 [Trichonephila clavipes]
OG0008333	0	relaxation	0.0025	0.0297611	26S proteasome regulatory subunit 10B [Trichonephila inaurata madagascariensis]
OG0009348	0.09	relaxation	0.0025	0.0297611	DCN1-like protein 1 [Trichonephila inaurata madagascariensis]
OG0010651	0.4	relaxation	0.0027	0.0318701	protein PBDC1, partial [Trichonephila inaurata madagascariensis]
OG0007564	0.27	relaxation	0.0028	0.0327183	trimethylguanosine synthase [Trichonephila inaurata madagascariensis]
OG0008214	0.53	relaxation	0.0029	0.0333835	hypothetical protein TNIN_29231 [Trichonephila inaurata madagascariensis]
OG0009028	0.17	relaxation	0.0029	0.0333835	protein wntless [Trichonephila inaurata madagascariensis]
OG0004679	0.54	relaxation	0.003	0.033974	hypothetical protein TNIN_248081 [Trichonephila inaurata madagascariensis]
OG0007590	0.47	relaxation	0.0031	0.0349929	importin-11 [Trichonephila inaurata madagascariensis]
OG0001458	0.32	relaxation	0.0032	0.0358318	glutathione S-transferase 1, isoform C [Trichonephila inaurata madagascariensis]
OG0004307	0.53	relaxation	0.0032	0.0358318	type 1 phosphatidylinositol 4,5-bisphosphate 4-phosphatase [Trichonephila inaurata madagascariensis]
OG0005713	0	relaxation	0.0034	0.0377081	cytochrome c oxidase assembly protein COX11, mitochondrial [Trichonephila inaurata madagascariensis]
OG0008283	0.2	relaxation	0.0034	0.0377081	sodium channel and clathrin linker 1 [Trichonephila inaurata madagascariensis]
OG0003565	0.32	relaxation	0.0035	0.038511	phosphatidate cytidylyltransferase, mitochondrial [Trichonephila inaurata madagascariensis]
OG0010521	0.4	relaxation	0.0035	0.038511	60S ribosome subunit biogenesis protein NIP7 homolog [Trichonephila inaurata madagascariensis]
OG0005117	0.34	relaxation	0.0036	0.03924	hypothetical protein TNIN_152131 [Trichonephila inaurata madagascariensis]
OG0008245	0.51	relaxation	0.0036	0.03924	estradiol 17-beta-dehydrogenase 8 [Trichonephila inaurata madagascariensis]
OG0002499	0.24	relaxation	0.0037	0.0400795	ribosome biogenesis protein NOP53 [Trichonephila inaurata madagascariensis]
OG0007871	0.68	relaxation	0.0038	0.0410989	calpain-7 [Trichonephila inaurata madagascariensis]
OG0005639	0.57	relaxation	0.0039	0.0417276	CCR4-NOT transcription complex subunit 9 [Trichonephila inaurata madagascariensis]
OG0005325	0.7	relaxation	0.0041	0.0434015	septin-2 [Trichonephila inaurata madagascariensis]
OG0009273	0.6	relaxation	0.0043	0.0448383	ubiA prenyltransferase domain-containing protein 1 homolog [Trichonephila inaurata madagascariensis]
OG0005443	0.06	relaxation	0.0046	0.0469146	probable RNA-binding protein 18 [Trichonephila inaurata madagascariensis]
OG0008475	0.67	relaxation	0.0046	0.0469146	complex I assembly factor ACAD9, mitochondrial [Trichonephila inaurata madagascariensis]
OG0005959	0.53	relaxation	0.0048	0.0485287	ras-related protein ced-10 [Trichonephila inaurata madagascariensis]
OG0008716	0.27	relaxation	0.0049	0.0491126	putative E3 ubiquitin-protein ligase UBR7 [Trichonephila inaurata madagascariensis]
OG0009176	0.33	relaxation	0.0049	0.0491126	origin recognition complex subunit 3 [Trichonephila inaurata madagascariensis]
OG0010342	0.19	relaxation	0.0049	0.0491126	uncharacterized protein TNCV_82301 [Trichonephila clavipes]
OG0001823	0.36	relaxation	0.005	0.0498286	actin-related protein 3 [Trichonephila inaurata madagascariensis]
OG0005972	0	relaxation	0.005	0.0498286	39S ribosomal protein L35, mitochondrial [Trichonephila inaurata madagascariensis]

## Sheet: Table S7
Table S7. Information of enriched gene ontologies for genes under convergent intensification in invasive spider branches with significance.
go_id	Pvalue	adjusted-Pvalue	go_term
GO:0009987	4.7471e-36	0	cellular process
GO:0065007	1.09892e-25	0	biological regulation
GO:0050789	1.86806e-23	0	regulation of biological process
GO:0050794	4.61878e-22	0	regulation of cellular process
GO:0008152	1.0511e-18	0	metabolic process
GO:0048518	2.53759e-18	0	positive regulation of biological process
GO:0048522	5.70457e-18	0	positive regulation of cellular process
GO:0044238	7.26995e-18	0	primary metabolic process
GO:0071840	1.00542e-17	0	cellular component organization or biogenesis
GO:0048519	6.22807e-16	0	negative regulation of biological process
GO:0044237	6.56838e-16	0	cellular metabolic process
GO:0048523	8.58183e-16	0	negative regulation of cellular process
GO:0016043	9.10924e-16	0	cellular component organization
GO:0019222	1.35815e-14	0	regulation of metabolic process
GO:0043170	1.8213e-13	0	macromolecule metabolic process
GO:0009893	7.59867e-13	0	positive regulation of metabolic process
GO:0048513	1.90137e-12	0	animal organ development
GO:0009653	2.17951e-12	0	anatomical structure morphogenesis
GO:0065008	3.66611e-12	0	regulation of biological quality
GO:0080090	4.28102e-12	0	regulation of primary metabolic process
GO:0008283	5.55351e-12	0	cell population proliferation
GO:0051179	5.89622e-12	0	localization
GO:0048856	1.105e-11	0	anatomical structure development
GO:0044085	1.81044e-11	0	cellular component biogenesis
GO:0031323	2.49921e-11	0	regulation of cellular metabolic process
GO:0006996	2.71111e-11	0	organelle organization
GO:0048468	3.89106e-11	0	cell development
GO:0048731	4.83932e-11	0	system development
GO:0009894	5.04466e-11	0	regulation of catabolic process
GO:0044249	6.13487e-11	0	cellular biosynthetic process
GO:0060255	9.40478e-11	0	regulation of macromolecule metabolic process
GO:0009887	1.11099e-10	0	animal organ morphogenesis
GO:0009058	1.40637e-10	0	biosynthetic process
GO:0032501	1.88761e-10	0	multicellular organismal process
GO:0023051	2.17132e-10	0	regulation of signaling
GO:0010646	2.54972e-10	0	regulation of cell communication
GO:0034654	2.62252e-10	0	nucleobase-containing compound biosynthetic process
GO:0006139	2.81537e-10	0	nucleobase-containing compound metabolic process
GO:0010604	3.06174e-10	0	positive regulation of macromolecule metabolic process
GO:0007275	3.76549e-10	0	multicellular organism development
GO:0141187	3.83802e-10	0	nucleic acid biosynthetic process
GO:0033036	5.61998e-10	0	macromolecule localization
GO:0032502	5.73484e-10	0	developmental process
GO:0030154	6.19162e-10	0	cell differentiation
GO:0048869	6.36839e-10	0	cellular developmental process
GO:0007154	7.96851e-10	0	cell communication
GO:0051128	7.99375e-10	0	regulation of cellular component organization
GO:0009056	8.24287e-10	0	catabolic process
GO:0048583	1.47232e-09	0	regulation of response to stimulus
GO:0023056	1.49348e-09	0	positive regulation of signaling
GO:0032774	1.51419e-09	0	RNA biosynthetic process
GO:0042127	1.62396e-09	0	regulation of cell population proliferation
GO:0010647	1.67472e-09	0	positive regulation of cell communication
GO:0060429	2.29023e-09	0	epithelium development
GO:0040008	2.29199e-09	0	regulation of growth
GO:0048477	2.32058e-09	0	oogenesis
GO:0009896	2.3763e-09	0	positive regulation of catabolic process
GO:0016070	2.44036e-09	0	RNA metabolic process
GO:0023052	2.47077e-09	0	signaling
GO:0009059	2.8854e-09	0	macromolecule biosynthetic process
GO:0009888	3.45439e-09	0	tissue development
GO:0022607	4.28078e-09	0	cellular component assembly
GO:0040007	5.59181e-09	0	growth
GO:0090304	6.83034e-09	0	nucleic acid metabolic process
GO:0007292	7.02355e-09	0	female gamete generation
GO:0070727	8.89255e-09	0	cellular macromolecule localization
GO:0010467	9.67883e-09	0	gene expression
GO:0022412	9.98057e-09	0	cellular process involved in reproduction in multicellular organism
GO:0051641	1.25478e-08	0	cellular localization
GO:0007281	1.98061e-08	0	germ cell development
GO:0031325	2.14237e-08	0	positive regulation of cellular metabolic process
GO:0032879	2.336e-08	0	regulation of localization
GO:0002009	2.86627e-08	0	morphogenesis of an epithelium
GO:0003002	3.47136e-08	0	regionalization
GO:0048729	3.74734e-08	0	tissue morphogenesis
GO:0006397	3.78033e-08	0	mRNA processing
GO:0036211	3.93728e-08	0	protein modification process
GO:0009966	4.08864e-08	0	regulation of signal transduction
GO:0007166	4.55052e-08	0	cell surface receptor signaling pathway
GO:0007389	4.6893e-08	0	pattern specification process
GO:0003006	5.14996e-08	0	developmental process involved in reproduction
GO:0051716	6.1639e-08	0	cellular response to stimulus
GO:0000375	7.29394e-08	0	RNA splicing, via transesterification reactions
GO:0000377	7.29394e-08	0	RNA splicing, via transesterification reactions with bulged adenosine as nucleophile
GO:0000398	7.29394e-08	0	mRNA splicing, via spliceosome
GO:0006810	7.86341e-08	0	transport
GO:0008380	7.8861e-08	0	RNA splicing
GO:0009889	8.03419e-08	0	regulation of biosynthetic process
GO:0007165	8.59481e-08	0	signal transduction
GO:0007423	9.51035e-08	0	sensory organ development
GO:0051234	9.51247e-08	0	establishment of localization
GO:0031326	1.03106e-07	0	regulation of cellular biosynthetic process
GO:0019219	1.23576e-07	0	regulation of nucleobase-containing compound metabolic process
GO:0016071	1.33513e-07	0	mRNA metabolic process
GO:0071705	1.34922e-07	0	nitrogen compound transport
GO:0007444	1.38221e-07	0	imaginal disc development
GO:0097435	1.52621e-07	0	supramolecular fiber organization
GO:0051239	1.63099e-07	0	regulation of multicellular organismal process
GO:0010468	1.73402e-07	0	regulation of gene expression
GO:0048585	1.80263e-07	0	negative regulation of response to stimulus
GO:0051247	1.81719e-07	0	positive regulation of protein metabolic process
GO:2000026	1.98724e-07	0	regulation of multicellular organismal development
GO:0051246	2.07674e-07	0	regulation of protein metabolic process
GO:0051130	2.12418e-07	0	positive regulation of cellular component organization
GO:0048646	2.24975e-07	0	anatomical structure formation involved in morphogenesis
GO:0009967	2.48995e-07	0	positive regulation of signal transduction
GO:0010556	2.52775e-07	0	regulation of macromolecule biosynthetic process
GO:0044087	2.71489e-07	0	regulation of cellular component biogenesis
GO:0044248	2.80574e-07	0	cellular catabolic process
GO:0140694	3.11463e-07	0	non-membrane-bounded organelle assembly
GO:0090066	3.60859e-07	0	regulation of anatomical structure size
GO:0007399	3.65539e-07	0	nervous system development
GO:0007010	3.82502e-07	0	cytoskeleton organization
GO:0006396	3.82579e-07	0	RNA processing
GO:0023061	4.01933e-07	0	signal release
GO:0048749	4.49761e-07	0	compound eye development
GO:0031329	4.95248e-07	0	regulation of cellular catabolic process
GO:0050896	5.24114e-07	0	response to stimulus
GO:0008104	5.5628e-07	0	protein localization
GO:0043412	5.72256e-07	0	macromolecule modification
GO:0035114	5.80118e-07	0	imaginal disc-derived appendage morphogenesis
GO:0033043	5.94301e-07	0	regulation of organelle organization
GO:0032940	6.06807e-07	0	secretion by cell
GO:0019915	6.23934e-07	0	lipid storage
GO:0002165	6.26261e-07	0	instar larval or pupal development
GO:0035107	6.47237e-07	0	appendage morphogenesis
GO:0032984	7.14645e-07	0	protein-containing complex disassembly
GO:0009791	7.82075e-07	0	post-embryonic development
GO:0016192	8.05872e-07	0	vesicle-mediated transport
GO:0048737	8.47704e-07	0	imaginal disc-derived appendage development
GO:0050793	9.07286e-07	0	regulation of developmental process
GO:0048736	9.94071e-07	0	appendage development
GO:0035120	1.0369e-06	0	post-embryonic appendage morphogenesis
GO:0044089	1.09736e-06	0	positive regulation of cellular component biogenesis
GO:0051649	1.1142e-06	0	establishment of localization in cell
GO:0045165	1.1274e-06	0	cell fate commitment
GO:0007167	1.20973e-06	0	enzyme-linked receptor protein signaling pathway
GO:0023057	1.25629e-06	0	negative regulation of signaling
GO:0140352	1.32967e-06	0	export from cell
GO:0010648	1.37997e-06	0	negative regulation of cell communication
GO:0035220	1.43726e-06	0	wing disc development
GO:0007472	1.70558e-06	0	wing disc morphogenesis
GO:0001654	1.74011e-06	0	eye development
GO:0048880	1.74011e-06	0	sensory system development
GO:0150063	1.74011e-06	0	visual system development
GO:0046903	1.86749e-06	0	secretion
GO:0016049	1.91821e-06	0	cell growth
GO:0009790	2.28068e-06	0	embryo development
GO:0002064	2.3002e-06	0	epithelial cell development
GO:0010883	2.32861e-06	0	regulation of lipid storage
GO:0007476	2.72848e-06	0.0001	imaginal disc-derived wing morphogenesis
GO:0007560	2.8994e-06	0.0001	imaginal disc morphogenesis
GO:0019538	2.97063e-06	0.0001	protein metabolic process
GO:1902903	3.02938e-06	0.0001	regulation of supramolecular fiber organization
GO:1902533	3.37819e-06	0.0001	positive regulation of intracellular signal transduction
GO:0007276	3.44233e-06	0.0001	gamete generation
GO:0060541	3.47177e-06	0.0001	respiratory system development
GO:0098657	3.47177e-06	0.0001	import into cell
GO:0001745	3.47779e-06	0.0001	compound eye morphogenesis
GO:0048469	3.79183e-06	0.0001	cell maturation
GO:0008285	3.85218e-06	0.0001	negative regulation of cell population proliferation
GO:0031331	3.85218e-06	0.0001	positive regulation of cellular catabolic process
GO:0009968	4.02167e-06	0.0001	negative regulation of signal transduction
GO:0030855	4.05152e-06	0.0001	epithelial cell differentiation
GO:0051252	4.14858e-06	0.0001	regulation of RNA metabolic process
GO:0046907	4.32657e-06	0.0001	intracellular transport
GO:0030707	4.39127e-06	0.0001	follicle cell of egg chamber development
GO:0035556	4.52947e-06	0.0001	intracellular signal transduction
GO:0043244	4.61509e-06	0.0001	regulation of protein-containing complex disassembly
GO:0071695	4.6646e-06	0.0001	anatomical structure maturation
GO:0048584	5.00826e-06	0.0001	positive regulation of response to stimulus
GO:0051235	5.23026e-06	0.0001	maintenance of location
GO:0048707	5.45775e-06	0.0001	instar larval or pupal morphogenesis
GO:1902904	5.71105e-06	0.0001	negative regulation of supramolecular fiber organization
GO:0051960	6.10984e-06	0.0001	regulation of nervous system development
GO:0007552	6.1669e-06	0.0001	metamorphosis
GO:0010927	6.31732e-06	0.0001	cellular component assembly involved in morphogenesis
GO:0032989	6.31732e-06	0.0001	cellular anatomical entity morphogenesis
GO:0030029	6.80631e-06	0.0001	actin filament-based process
GO:0007424	6.97536e-06	0.0001	open tracheal system development
GO:0051261	7.01933e-06	0.0001	protein depolymerization
GO:0051494	7.01933e-06	0.0001	negative regulation of cytoskeleton organization
GO:0048609	7.02529e-06	0.0001	multicellular organismal reproductive process
GO:1902531	7.32096e-06	0.0002	regulation of intracellular signal transduction
GO:0015031	8.08458e-06	0.0002	protein transport
GO:0048592	8.44837e-06	0.0003	eye morphogenesis
GO:0090596	8.44837e-06	0.0003	sensory organ morphogenesis
GO:0010498	8.72798e-06	0.0003	proteasomal protein catabolic process
GO:0007026	8.84428e-06	0.0004	negative regulation of microtubule depolymerization
GO:0022008	9.95711e-06	0.0004	neurogenesis
GO:0009886	1.00922e-05	0.0004	post-embryonic animal morphogenesis
GO:0006897	1.02685e-05	0.0004	endocytosis
GO:0030036	1.03351e-05	0.0004	actin cytoskeleton organization
GO:0045927	1.0384e-05	0.0004	positive regulation of growth
GO:0042592	1.14904e-05	0.0004	homeostatic process
GO:0045732	1.17255e-05	0.0004	positive regulation of protein catabolic process
GO:0032535	1.17382e-05	0.0004	regulation of cellular component size
GO:0021700	1.18742e-05	0.0004	developmental maturation
GO:0007019	1.32434e-05	0.0004	microtubule depolymerization
GO:0016477	1.32465e-05	0.0004	cell migration
GO:0043687	1.3478e-05	0.0004	post-translational protein modification
GO:0009611	1.34852e-05	0.0004	response to wounding
GO:0048589	1.40722e-05	0.0004	developmental growth
GO:0007528	1.42649e-05	0.0004	neuromuscular junction development
GO:0051301	1.47462e-05	0.0004	cell division
GO:0009953	1.6892e-05	0.0006	dorsal/ventral pattern formation
GO:0009891	1.79269e-05	0.0007	positive regulation of biosynthetic process
GO:0009892	1.97401e-05	0.0007	negative regulation of metabolic process
GO:0061919	2.68266e-05	0.0007	process utilizing autophagic mechanism
GO:0030163	2.72126e-05	0.0007	protein catabolic process
GO:0001738	2.72899e-05	0.0007	morphogenesis of a polarized epithelium
GO:0006793	2.7297e-05	0.0007	phosphorus metabolic process
GO:0006796	2.7297e-05	0.0007	phosphate-containing compound metabolic process
GO:0048638	3.01323e-05	0.0007	regulation of developmental growth
GO:0031324	3.11688e-05	0.0007	negative regulation of cellular metabolic process
GO:1904396	3.1223e-05	0.0007	regulation of neuromuscular junction development
GO:0031111	2.13912e-05	0.0008	negative regulation of microtubule polymerization or depolymerization
GO:0070647	2.15405e-05	0.0008	protein modification by small protein conjugation or removal
GO:0042176	2.35392e-05	0.0008	regulation of protein catabolic process
GO:0043161	2.53911e-05	0.0008	proteasome-mediated ubiquitin-dependent protein catabolic process
GO:0006914	2.68266e-05	0.0008	autophagy
GO:0048699	3.14447e-05	0.0008	generation of neurons
GO:0051603	3.18081e-05	0.0008	proteolysis involved in protein catabolic process
GO:0010256	3.21029e-05	0.0008	endomembrane system organization
GO:0008589	3.2259e-05	0.0008	regulation of smoothened signaling pathway
GO:0031328	3.46015e-05	0.0008	positive regulation of cellular biosynthetic process
GO:0050803	3.78577e-05	0.0008	regulation of synapse structure or activity
GO:0006836	4.00626e-05	0.0009	neurotransmitter transport
GO:1901888	4.00626e-05	0.0009	regulation of cell junction assembly
GO:0031114	4.46594e-05	0.001	regulation of microtubule depolymerization
GO:0010506	4.71346e-05	0.0011	regulation of autophagy
GO:0010557	4.79049e-05	0.0011	positive regulation of macromolecule biosynthetic process
GO:0071495	4.816e-05	0.0011	cellular response to endogenous stimulus
GO:0009057	4.91945e-05	0.0011	macromolecule catabolic process
GO:0045184	5.08837e-05	0.0011	establishment of protein localization
GO:0007169	5.09575e-05	0.0011	cell surface receptor protein tyrosine kinase signaling pathway
GO:0034330	5.29079e-05	0.0012	cell junction organization
GO:0030239	5.49512e-05	0.0012	myofibril assembly
GO:0022411	5.51948e-05	0.0012	cellular component disassembly
GO:0045935	5.742e-05	0.0012	positive regulation of nucleobase-containing compound metabolic process
GO:0051049	6.06125e-05	0.0012	regulation of transport
GO:0010638	6.10661e-05	0.0012	positive regulation of organelle organization
GO:0050806	6.30917e-05	0.0012	positive regulation of synaptic transmission
GO:0007405	6.40477e-05	0.0012	neuroblast proliferation
GO:0045214	6.61999e-05	0.0012	sarcomere organization
GO:0007298	6.95946e-05	0.0012	border follicle cell migration
GO:0051493	6.98543e-05	0.0012	regulation of cytoskeleton organization
GO:0007224	7.02738e-05	0.0012	smoothened signaling pathway
GO:0009719	7.49145e-05	0.0014	response to endogenous stimulus
GO:0008582	7.8419e-05	0.0014	regulation of synaptic assembly at neuromuscular junction
GO:1901879	7.85091e-05	0.0014	regulation of protein depolymerization
GO:0010876	7.91527e-05	0.0014	lipid localization
GO:0043069	8.09128e-05	0.0014	negative regulation of programmed cell death
GO:0055002	8.37495e-05	0.0014	striated muscle cell development
GO:0035152	8.42938e-05	0.0014	regulation of tube architecture, open tracheal system
GO:0010605	8.81049e-05	0.0015	negative regulation of macromolecule metabolic process
GO:0022414	8.84192e-05	0.0015	reproductive process
GO:0051129	9.07601e-05	0.0015	negative regulation of cellular component organization
GO:0006886	9.19879e-05	0.0015	intracellular protein transport
GO:0035282	9.19879e-05	0.0015	segmentation
GO:0001667	9.21639e-05	0.0015	ameboidal-type cell migration
GO:0030718	9.32964e-05	0.0015	germ-line stem cell population maintenance
GO:0030182	9.51236e-05	0.0015	neuron differentiation
GO:0070925	0.000109488	0.0015	organelle assembly
GO:0031032	0.000119616	0.0015	actomyosin structure organization
GO:0010631	0.00012305	0.0015	epithelial cell migration
GO:0016567	0.000123123	0.0015	protein ubiquitination
GO:0048870	0.000126197	0.0015	cell motility
GO:0007293	0.000130195	0.0015	germarium-derived egg chamber formation
GO:0043484	0.000130195	0.0015	regulation of RNA splicing
GO:0061351	0.000130195	0.0015	neural precursor cell proliferation
GO:0090132	0.000130717	0.0015	epithelium migration
GO:1905952	9.67848e-05	0.0016	regulation of lipid localization
GO:0043933	9.93769e-05	0.0016	protein-containing complex organization
GO:0007267	0.000100337	0.0016	cell-cell signaling
GO:0019220	0.000108402	0.0016	regulation of phosphate metabolic process
GO:0051174	0.000108402	0.0016	regulation of phosphorus metabolic process
GO:1903311	0.000108881	0.0016	regulation of mRNA metabolic process
GO:0030833	0.000109156	0.0016	regulation of actin filament polymerization
GO:0043066	0.000136158	0.0016	negative regulation of apoptotic process
GO:0051963	0.000136158	0.0016	regulation of synapse assembly
GO:0072659	0.00014062	0.0016	protein localization to plasma membrane
GO:0045913	0.000145165	0.0016	positive regulation of carbohydrate metabolic process
GO:0006511	0.000159598	0.0017	ubiquitin-dependent protein catabolic process
GO:0008356	0.000166838	0.0017	asymmetric cell division
GO:0042886	0.000172582	0.0017	amide transport
GO:0043491	0.000172582	0.0017	phosphatidylinositol 3-kinase/protein kinase B signal transduction
GO:0032446	0.000173078	0.0017	protein modification by small protein conjugation
GO:0048599	0.000173748	0.0017	oocyte development
GO:0060341	0.000173748	0.0017	regulation of cellular localization
GO:0141124	0.000176172	0.0017	intracellular signaling cassette
GO:0008064	0.000179207	0.0017	regulation of actin polymerization or depolymerization
GO:0016310	0.000179207	0.0017	phosphorylation
GO:0035239	0.000186046	0.0019	tube morphogenesis
GO:0007297	0.000188275	0.0019	follicle cell of egg chamber migration
GO:0051093	0.000191623	0.0019	negative regulation of developmental process
GO:0099003	0.000195847	0.0019	vesicle-mediated transport in synapse
GO:0009994	0.000197009	0.0019	oocyte differentiation
GO:0019941	0.000197112	0.0019	modification-dependent protein catabolic process
GO:1903034	0.000206244	0.0019	regulation of response to wounding
GO:0007028	0.000180481	0.002	cytoplasm organization
GO:0042060	0.000180481	0.002	wound healing
GO:0055001	0.00018081	0.002	muscle cell development
GO:0099504	0.00018085	0.002	synaptic vesicle cycle
GO:0030097	0.000197264	0.002	hemopoiesis
GO:0048024	0.000197264	0.002	regulation of mRNA splicing, via spliceosome
GO:0007308	0.000201139	0.002	oocyte construction
GO:0030832	0.000201535	0.002	regulation of actin filament length
GO:0006470	0.000206494	0.002	protein dephosphorylation
GO:0090130	0.000208526	0.002	tissue migration
GO:0043632	0.000214169	0.002	modification-dependent macromolecule catabolic process
GO:0008284	0.000215338	0.002	positive regulation of cell population proliferation
GO:0019953	0.000218211	0.002	sexual reproduction
GO:0010628	0.00022477	0.002	positive regulation of gene expression
GO:0007447	0.00022902	0.002	imaginal disc pattern formation
GO:0048732	0.000235581	0.002	gland development
GO:0007049	0.000236189	0.0021	cell cycle
GO:0006351	0.000246527	0.0021	DNA-templated transcription
GO:0001736	0.000255676	0.0021	establishment of planar polarity
GO:0007164	0.000255676	0.0021	establishment of tissue polarity
GO:0034329	0.000258352	0.0021	cell junction assembly
GO:0051962	0.000266824	0.0021	positive regulation of nervous system development
GO:0060284	0.0002811	0.0022	regulation of cell development
GO:0030041	0.000282598	0.0023	actin filament polymerization
GO:0062012	0.000294103	0.0024	regulation of small molecule metabolic process
GO:0001558	0.000294588	0.0024	regulation of cell growth
GO:0110053	0.000294588	0.0024	regulation of actin filament organization
GO:1901880	0.000294983	0.0024	negative regulation of protein depolymerization
GO:0007015	0.000297861	0.0024	actin filament organization
GO:0007269	0.000302156	0.0024	neurotransmitter secretion
GO:0008298	0.000302156	0.0024	intracellular mRNA localization
GO:0099643	0.000302156	0.0024	signal release from synapse
GO:0007350	0.000306244	0.0024	blastoderm segmentation
GO:0070507	0.00033426	0.0025	regulation of microtubule cytoskeleton organization
GO:0098840	0.000352436	0.0028	protein transport along microtubule
GO:0099118	0.000352436	0.0028	microtubule-based protein transport
GO:0060810	0.00035422	0.0028	intracellular mRNA localization involved in pattern specification process
GO:0006950	0.000354246	0.0028	response to stress
GO:0050804	0.000354992	0.0028	modulation of chemical synaptic transmission
GO:0099177	0.000354992	0.0028	regulation of trans-synaptic signaling
GO:0043242	0.000364533	0.0028	negative regulation of protein-containing complex disassembly
GO:0032271	0.00038853	0.0029	regulation of protein polymerization
GO:1990778	0.000430277	0.0029	protein localization to cell periphery
GO:0002011	0.000400273	0.003	morphogenesis of an epithelial sheet
GO:0050684	0.000416457	0.003	regulation of mRNA processing
GO:1903530	0.000423474	0.003	regulation of secretion by cell
GO:0048135	0.000445794	0.0031	female germ-line cyst formation
GO:0007310	0.000459497	0.0031	oocyte dorsal/ventral axis specification
GO:0006090	0.000481712	0.0032	pyruvate metabolic process
GO:1902692	0.000481712	0.0032	regulation of neuroblast proliferation
GO:0006355	0.000487511	0.0032	regulation of DNA-templated transcription
GO:2001141	0.000487511	0.0032	regulation of RNA biosynthetic process
GO:0010558	0.000499336	0.0032	negative regulation of macromolecule biosynthetic process
GO:0000226	0.000518118	0.0032	microtubule cytoskeleton organization
GO:0030838	0.000534414	0.0033	positive regulation of actin filament polymerization
GO:0045196	0.000534414	0.0033	establishment or maintenance of neuroblast polarity
GO:0016331	0.000544292	0.0033	morphogenesis of embryonic epithelium
GO:0030334	0.000547939	0.0033	regulation of cell migration
GO:0048878	0.000551218	0.0033	chemical homeostasis
GO:0031445	0.000539985	0.0034	regulation of heterochromatin formation
GO:0043470	0.000539985	0.0034	regulation of carbohydrate catabolic process
GO:0048639	0.000564626	0.0034	positive regulation of developmental growth
GO:0007309	0.000568497	0.0034	oocyte axis specification
GO:0006366	0.000583195	0.0034	transcription by RNA polymerase II
GO:0031327	0.000586089	0.0034	negative regulation of cellular biosynthetic process
GO:0009895	0.000577844	0.0035	negative regulation of catabolic process
GO:0031647	0.000577844	0.0035	regulation of protein stability
GO:0007017	0.000602707	0.0035	microtubule-based process
GO:0035207	0.000604587	0.0039	negative regulation of hemocyte proliferation
GO:0051643	0.000604587	0.0039	endoplasmic reticulum localization
GO:0008592	0.000610873	0.0039	regulation of Toll signaling pathway
GO:0032886	0.000635247	0.0039	regulation of microtubule-based process
GO:0051124	0.00064162	0.0039	synaptic assembly at neuromuscular junction
GO:0051046	0.000646471	0.0039	regulation of secretion
GO:2000145	0.000646471	0.0039	regulation of cell motility
GO:0051896	0.00064837	0.0039	regulation of phosphatidylinositol 3-kinase/protein kinase B signal transduction
GO:0019827	0.000653658	0.0039	stem cell population maintenance
GO:0098727	0.000653658	0.0039	maintenance of cell number
GO:0051254	0.000654479	0.0039	positive regulation of RNA metabolic process
GO:0009880	0.000658598	0.0039	embryonic pattern specification
GO:0050807	0.000669694	0.0039	regulation of synapse organization
GO:0032434	0.000676878	0.004	regulation of proteasomal ubiquitin-dependent protein catabolic process
GO:0045595	0.000677562	0.004	regulation of cell differentiation
GO:0009890	0.000685986	0.004	negative regulation of biosynthetic process
GO:0008154	0.000697165	0.004	actin polymerization or depolymerization
GO:0006084	0.000697665	0.0041	acetyl-CoA metabolic process
GO:0051276	0.000702537	0.0041	chromosome organization
GO:0007084	0.000706409	0.0054	mitotic nuclear membrane reassembly
GO:0007285	0.000706409	0.0054	primary spermatocyte growth
GO:0042062	0.000706409	0.0054	long-term strengthening of neuromuscular junction
GO:0101024	0.000706409	0.0054	mitotic nuclear membrane organization
GO:0008358	0.000753973	0.0055	maternal determination of anterior/posterior axis, embryo
GO:0008219	0.00076812	0.0056	cell death
GO:0012501	0.00076812	0.0056	programmed cell death
GO:0051241	0.000788095	0.0056	negative regulation of multicellular organismal process
GO:0051050	0.00080466	0.0057	positive regulation of transport
GO:0008340	0.000831276	0.0058	determination of adult lifespan
GO:0016241	0.000838498	0.0058	regulation of macroautophagy
GO:0045879	0.000838498	0.0058	negative regulation of smoothened signaling pathway
GO:0006629	0.000869361	0.0058	lipid metabolic process
GO:0033554	0.00087105	0.0058	cellular response to stress
GO:0010639	0.000835576	0.0059	negative regulation of organelle organization
GO:1901700	0.000837363	0.0059	response to oxygen-containing compound
GO:0035329	0.000887058	0.0059	hippo signaling
GO:0006109	0.00090724	0.0059	regulation of carbohydrate metabolic process
GO:0045934	0.000907927	0.0059	negative regulation of nucleobase-containing compound metabolic process
GO:0050767	0.000911585	0.0059	regulation of neurogenesis
GO:0002520	0.000912607	0.0059	immune system development
GO:0048534	0.000912607	0.0059	hematopoietic or lymphoid organ development
GO:0048542	0.000912607	0.0059	lymph gland development
GO:0062013	0.000912975	0.0061	positive regulation of small molecule metabolic process
GO:0003008	0.000918482	0.0061	system process
GO:0080134	0.000942619	0.0062	regulation of response to stress
GO:0006110	0.000948266	0.0063	regulation of glycolytic process
GO:0007296	0.000948266	0.0063	vitellogenesis
GO:0030811	0.000948266	0.0063	regulation of nucleotide catabolic process
GO:0033121	0.000948266	0.0063	regulation of purine nucleotide catabolic process
GO:0016050	0.000969302	0.0063	vesicle organization
GO:0051253	0.000978133	0.0063	negative regulation of RNA metabolic process
GO:0045596	0.000957354	0.0064	negative regulation of cell differentiation
GO:0045880	0.00102726	0.0065	positive regulation of smoothened signaling pathway
GO:0010508	0.00102913	0.0065	positive regulation of autophagy
GO:0016079	0.00102913	0.0065	synaptic vesicle exocytosis
GO:0050808	0.00105261	0.0065	synapse organization
GO:0007163	0.00110074	0.0065	establishment or maintenance of cell polarity
GO:0035168	0.00107191	0.0066	larval lymph gland hemocyte differentiation
GO:0030100	0.00108372	0.0066	regulation of endocytosis
GO:0051668	0.00109408	0.0066	localization within membrane
GO:0080171	0.00112456	0.0066	lytic vacuole organization
GO:0007040	0.00112456	0.0067	lysosome organization
GO:0035171	0.00112456	0.0067	lamellocyte differentiation
GO:0006468	0.00115911	0.0067	protein phosphorylation
GO:0045229	0.00119957	0.0067	external encapsulating structure organization
GO:0032787	0.00120924	0.0067	monocarboxylic acid metabolic process
GO:0002683	0.00120983	0.0067	negative regulation of immune system process
GO:0006357	0.00122718	0.0067	regulation of transcription by RNA polymerase II
GO:0007041	0.00125047	0.0067	lysosomal transport
GO:0030335	0.00125227	0.0067	positive regulation of cell migration
GO:0060811	0.00127955	0.0068	intracellular mRNA localization involved in anterior/posterior axis specification
GO:0006195	0.00130354	0.007	purine nucleotide catabolic process
GO:0030307	0.00130354	0.007	positive regulation of cell growth
GO:0048598	0.00131178	0.007	embryonic morphogenesis
GO:0045451	0.00137717	0.0072	pole plasm oskar mRNA localization
GO:2000177	0.00137717	0.0072	regulation of neural precursor cell proliferation
GO:0035204	0.00139439	0.0081	negative regulation of lamellocyte differentiation
GO:0010906	0.00139477	0.0082	regulation of glucose metabolic process
GO:0030011	0.00139477	0.0082	maintenance of cell polarity
GO:1902275	0.00145008	0.0086	regulation of chromatin organization
GO:0007416	0.0014525	0.0086	synapse assembly
GO:0048871	0.00146373	0.0087	multicellular organismal-level homeostasis
GO:0007098	0.00150254	0.0087	centrosome cycle
GO:0043410	0.00150254	0.0087	positive regulation of MAPK cascade
GO:2000147	0.0015116	0.0088	positive regulation of cell motility
GO:0001751	0.00152031	0.0088	compound eye photoreceptor cell differentiation
GO:0007274	0.00162503	0.0088	neuromuscular synaptic transmission
GO:0035222	0.00162503	0.0088	wing disc pattern formation
GO:0033044	0.00165603	0.0089	regulation of chromosome organization
GO:0048134	0.00167219	0.009	germ-line cyst formation
GO:0035212	0.00170717	0.0092	cell competition in a multicellular organism
GO:0090175	0.00170717	0.0092	regulation of establishment of planar polarity
GO:0042692	0.00176027	0.0092	muscle cell differentiation
GO:0061136	0.00181096	0.0094	regulation of proteasomal protein catabolic process
GO:0045893	0.00182835	0.0094	positive regulation of DNA-templated transcription
GO:1902680	0.00182835	0.0094	positive regulation of RNA biosynthetic process
GO:0030716	0.00191828	0.0096	oocyte fate determination
GO:0031110	0.00191828	0.0096	regulation of microtubule polymerization or depolymerization
GO:0043408	0.00193043	0.0097	regulation of MAPK cascade
GO:0043697	0.00195282	0.0101	cell dedifferentiation
GO:0045055	0.00197691	0.0101	regulated exocytosis
GO:0043696	0.00195282	0.0102	dedifferentiation
GO:0030537	0.00197691	0.0102	larval behavior
GO:0042593	0.00202271	0.0103	glucose homeostasis
GO:0001752	0.00204048	0.0103	compound eye photoreceptor fate commitment
GO:0042706	0.00204048	0.0103	eye photoreceptor cell fate commitment
GO:0046883	0.002065	0.0105	regulation of hormone secretion
GO:0106016	0.00208181	0.0126	positive regulation of inflammatory response to wounding
GO:1900037	0.00208181	0.0126	regulation of cellular response to hypoxia
GO:0019094	0.00215439	0.0126	pole plasm mRNA localization
GO:0035295	0.00218487	0.0126	tube development
GO:0046530	0.00223507	0.0126	photoreceptor cell differentiation
GO:0032880	0.00235659	0.0126	regulation of protein localization
GO:0051258	0.00235659	0.0126	protein polymerization
GO:0035330	0.00236095	0.0126	regulation of hippo signaling
GO:0090594	0.00208181	0.0127	inflammatory response to wounding
GO:0106014	0.00208181	0.0127	regulation of inflammatory response to wounding
GO:0006887	0.00221085	0.0127	exocytosis
GO:0040029	0.00221173	0.0127	epigenetic regulation of gene expression
GO:0001709	0.00222862	0.0127	cell fate determination
GO:0001754	0.00224822	0.0127	eye photoreceptor cell differentiation
GO:0061061	0.00226847	0.0127	muscle structure development
GO:0031667	0.00231322	0.0127	response to nutrient levels
GO:0048666	0.00233854	0.0127	neuron development
GO:0007316	0.00234394	0.0127	pole plasm RNA localization
GO:0040017	0.00234394	0.0127	positive regulation of locomotion
GO:2000058	0.00234394	0.0127	regulation of ubiquitin-dependent protein catabolic process
GO:0007314	0.00235659	0.0127	oocyte anterior/posterior axis specification
GO:1903532	0.00218983	0.0128	positive regulation of secretion by cell
GO:0031023	0.00219613	0.0128	microtubule organizing center organization
GO:0006403	0.00231322	0.0128	RNA localization
GO:0008063	0.00247854	0.0128	Toll signaling pathway
GO:0009166	0.00247854	0.0128	nucleotide catabolic process
GO:0035149	0.00248834	0.0128	lumen formation, open tracheal system
GO:0002181	0.00249775	0.0128	cytoplasmic translation
GO:0007391	0.00250985	0.0128	dorsal closure
GO:0043436	0.00255682	0.0128	oxoacid metabolic process
GO:0009914	0.00247145	0.0129	hormone transport
GO:0046879	0.00247145	0.0129	hormone secretion
GO:0019752	0.00247636	0.0129	carboxylic acid metabolic process
GO:0034332	0.00248834	0.0129	adherens junction organization
GO:0042981	0.00265359	0.0132	regulation of apoptotic process
GO:0010888	0.0026324	0.0133	negative regulation of lipid storage
GO:0035203	0.0026324	0.0133	regulation of lamellocyte differentiation
GO:0051781	0.0026324	0.0133	positive regulation of cell division
GO:1905953	0.0026324	0.0133	negative regulation of lipid localization
GO:0016236	0.00264341	0.0133	macroautophagy
GO:0009798	0.00265359	0.0133	axis specification
GO:0042254	0.00265359	0.0133	ribosome biogenesis
GO:0032102	0.00267092	0.0133	negative regulation of response to external stimulus
GO:0051146	0.00271958	0.0133	striated muscle cell differentiation
GO:0045807	0.00273345	0.0133	positive regulation of endocytosis
GO:0006085	0.0026324	0.0134	acetyl-CoA biosynthetic process
GO:0006082	0.0028115	0.0134	organic acid metabolic process
GO:0051047	0.00281531	0.0135	positive regulation of secretion
GO:0072526	0.00281531	0.0135	pyridine-containing compound catabolic process
GO:0022613	0.00281902	0.0135	ribonucleoprotein complex biogenesis
GO:0019364	0.00281531	0.0136	pyridine nucleotide catabolic process
GO:0046330	0.00281531	0.0136	positive regulation of JNK cascade
GO:0048167	0.00281531	0.0136	regulation of synaptic plasticity
GO:0060446	0.00299031	0.0136	branching involved in open tracheal system development
GO:0008345	0.00281531	0.0137	larval locomotory behavior
GO:0045752	0.00292965	0.0137	positive regulation of Toll signaling pathway
GO:0060438	0.00292965	0.0137	trachea development
GO:0007611	0.00294167	0.0137	learning or memory
GO:0031109	0.00299031	0.0137	microtubule polymerization or depolymerization
GO:0048754	0.00299031	0.0137	branching morphogenesis of an epithelial tube
GO:0050890	0.00307944	0.0138	cognition
GO:0098916	0.00320942	0.0138	anterograde trans-synaptic signaling
GO:0046328	0.00323353	0.0138	regulation of JNK cascade
GO:0046434	0.00323353	0.0138	organophosphate catabolic process
GO:0048588	0.00323353	0.0138	developmental cell growth
GO:0061138	0.00323353	0.0138	morphogenesis of a branching epithelium
GO:0007268	0.00320942	0.0139	chemical synaptic transmission
GO:0009913	0.00330158	0.0139	epidermal cell differentiation
GO:0048190	0.00330158	0.0139	wing disc dorsal/ventral pattern formation
GO:0000380	0.00333572	0.0139	alternative mRNA splicing, via spliceosome
GO:1903706	0.00344103	0.0144	regulation of hemopoiesis
GO:0007168	0.00344103	0.0145	receptor guanylyl cyclase signaling pathway
GO:0032785	0.00344103	0.0145	negative regulation of DNA-templated transcription, elongation
GO:0045463	0.00344103	0.0145	R8 cell development
GO:1903578	0.00344103	0.0145	regulation of ATP metabolic process
GO:0030727	0.00344267	0.0147	germarium-derived female germ-line cyst formation
GO:0032273	0.00344267	0.0147	positive regulation of protein polymerization
GO:2000027	0.00344267	0.0147	regulation of animal organ morphogenesis
GO:2001252	0.00344267	0.0147	positive regulation of chromosome organization
GO:0009950	0.00349155	0.0147	dorsal/ventral axis specification
GO:0045892	0.00353651	0.0147	negative regulation of DNA-templated transcription
GO:1902679	0.00353651	0.0147	negative regulation of RNA biosynthetic process
GO:1901292	0.00361655	0.0147	nucleoside phosphate catabolic process
GO:0099537	0.00375967	0.0147	trans-synaptic signaling
GO:0001763	0.00376496	0.0147	morphogenesis of a branching structure
GO:0007306	0.00380315	0.0147	egg chorion assembly
GO:0043254	0.00380315	0.0147	regulation of protein-containing complex assembly
GO:0016197	0.00384593	0.0147	endosomal transport
GO:0070848	0.00360304	0.0148	response to growth factor
GO:0071363	0.00360304	0.0148	cellular response to growth factor stimulus
GO:0031399	0.00361655	0.0148	regulation of protein modification process
GO:0035166	0.00361655	0.0148	post-embryonic hemopoiesis
GO:0035167	0.00361655	0.0148	larval lymph gland hemopoiesis
GO:0051223	0.00361655	0.0148	regulation of protein transport
GO:0010629	0.00393026	0.0148	negative regulation of gene expression
GO:0046843	0.00395329	0.0148	dorsal appendage formation
GO:0048488	0.00356067	0.0149	synaptic vesicle endocytosis
GO:0061572	0.00356067	0.0149	actin filament bundle organization
GO:0140238	0.00356067	0.0149	presynaptic endocytosis
GO:0046552	0.00356351	0.0149	photoreceptor cell fate commitment
GO:0032956	0.00360304	0.0149	regulation of actin cytoskeleton organization
GO:0007446	0.00395329	0.0149	imaginal disc growth
GO:0035206	0.00398208	0.0149	regulation of hemocyte proliferation
GO:0035332	0.00398208	0.0149	positive regulation of hippo signaling
GO:1902905	0.00398208	0.0149	positive regulation of supramolecular fiber organization
GO:1903688	0.00398208	0.0149	positive regulation of border follicle cell migration
GO:2001234	0.00401351	0.015	negative regulation of apoptotic signaling pathway
GO:0032970	0.00404044	0.0151	regulation of actin filament-based process
GO:0090148	0.00409025	0.0176	membrane fission
GO:0140673	0.00409025	0.0176	transcription elongation-coupled chromatin remodeling
GO:0061024	0.00416176	0.0176	membrane organization
GO:0006417	0.00429227	0.0176	regulation of translation
GO:0033500	0.00431268	0.0176	carbohydrate homeostasis
GO:0035150	0.00431268	0.0176	regulation of tube size
GO:0042067	0.00431268	0.0176	establishment of ommatidial planar polarity
GO:0050729	0.00409025	0.0177	positive regulation of inflammatory response
GO:0051126	0.00409025	0.0177	negative regulation of actin nucleation
GO:0061817	0.00409025	0.0177	endoplasmic reticulum-plasma membrane tethering
GO:0001845	0.00409025	0.0178	phagolysosome assembly
GO:0030813	0.00409025	0.0178	positive regulation of nucleotide catabolic process
GO:0033123	0.00409025	0.0178	positive regulation of purine nucleotide catabolic process
GO:0045821	0.00409025	0.0178	positive regulation of glycolytic process
GO:1900542	0.00438573	0.018	regulation of purine nucleotide metabolic process
GO:0006140	0.00438573	0.0181	regulation of nucleotide metabolic process
GO:0032387	0.00438573	0.0181	negative regulation of intracellular transport
GO:0042220	0.00438573	0.0181	response to cocaine
GO:0010634	0.00443795	0.0182	positive regulation of epithelial cell migration
GO:0016239	0.00443795	0.0182	positive regulation of macroautophagy
GO:0045465	0.00443795	0.0182	R8 cell differentiation
GO:0007351	0.00447929	0.0182	tripartite regional subdivision
GO:0008595	0.00447929	0.0182	anterior/posterior axis specification, embryo
GO:0030162	0.0045183	0.0182	regulation of proteolysis
GO:0007009	0.00443795	0.0183	plasma membrane organization
GO:0007450	0.00469563	0.0184	dorsal/ventral pattern formation, imaginal disc
GO:0017145	0.00469563	0.0184	stem cell division
GO:0046667	0.00464506	0.0185	compound eye retinal cell programmed cell death
GO:0007616	0.00468328	0.0185	long-term memory
GO:0055088	0.00468328	0.0185	lipid homeostasis
GO:0099536	0.00480122	0.0186	synaptic signaling
GO:0043067	0.00486153	0.0187	regulation of programmed cell death
GO:0010817	0.00488851	0.0187	regulation of hormone levels
GO:0051495	0.0049298	0.0188	positive regulation of cytoskeleton organization
GO:1903684	0.0049298	0.0188	regulation of border follicle cell migration
GO:0001700	0.00496873	0.0188	embryonic development via the syncytial blastoderm
GO:0044255	0.00522004	0.0188	cellular lipid metabolic process
GO:0051240	0.00529015	0.0188	positive regulation of multicellular organismal process
GO:1901698	0.00509087	0.0189	response to nitrogen compound
GO:0016322	0.00510302	0.0189	neuron remodeling
GO:0000165	0.00514583	0.0189	MAPK cascade
GO:0019637	0.00517867	0.0189	organophosphate metabolic process
GO:0000578	0.00519208	0.0189	embryonic axis specification
GO:0040012	0.00531633	0.0189	regulation of locomotion
GO:1903036	0.00534014	0.0192	positive regulation of response to wounding
GO:0042594	0.00537889	0.0192	response to starvation
GO:0040011	0.00538654	0.0192	locomotion
GO:0022402	0.00539199	0.0192	cell cycle process
GO:0007294	0.00534014	0.0193	germarium-derived oocyte fate determination
GO:1903050	0.00538309	0.0193	regulation of proteolysis involved in protein catabolic process
GO:0035010	0.00545908	0.0194	encapsulation of foreign target
GO:0045887	0.00545908	0.0194	positive regulation of synaptic assembly at neuromuscular junction
GO:0035196	0.00547267	0.0203	miRNA processing
GO:0046664	0.00547267	0.0203	dorsal closure, amnioserosa morphology change
GO:0072523	0.00553574	0.0203	purine-containing compound catabolic process
GO:0060562	0.00560525	0.0203	epithelial tube morphogenesis
GO:0030177	0.00553574	0.0204	positive regulation of Wnt signaling pathway
GO:0031123	0.00576105	0.0207	RNA 3'-end processing
GO:0044281	0.00589438	0.0208	small molecule metabolic process
GO:0042551	0.00599469	0.021	neuron maturation
GO:0009154	0.00602726	0.0212	purine ribonucleotide catabolic process
GO:0009261	0.00602726	0.0212	ribonucleotide catabolic process
GO:0046666	0.00610145	0.0212	retinal cell programmed cell death
GO:0016319	0.00615851	0.0212	mushroom body development
GO:0002052	0.00610145	0.0213	positive regulation of neuroblast proliferation
GO:0032870	0.00621938	0.0213	cellular response to hormone stimulus
GO:0000902	0.00639833	0.0213	cell morphogenesis
GO:0070201	0.00648074	0.0214	regulation of establishment of protein localization
GO:0080135	0.00648074	0.0214	regulation of cellular response to stress
GO:0002164	0.00658864	0.0215	larval development
GO:0036465	0.00663578	0.0216	synaptic vesicle recycling
GO:1904398	0.00663578	0.0216	positive regulation of neuromuscular junction development
GO:0180010	0.00669724	0.0247	co-transcriptional mRNA 3'-end processing, cleavage and polyadenylation pathway
GO:0180012	0.00669724	0.0247	co-transcriptional RNA 3'-end processing, cleavage and polyadenylation pathway
GO:0050891	0.00669724	0.0248	multicellular organismal-level water homeostasis
GO:0061964	0.00669724	0.0248	negative regulation of entry into reproductive diapause
GO:0140374	0.00669724	0.0248	antiviral innate immune response
GO:0006086	0.00669724	0.0249	acetyl-CoA biosynthetic process from pyruvate
GO:0031468	0.00669724	0.0249	nuclear membrane reassembly
GO:0048168	0.00670724	0.0255	regulation of neuronal synaptic plasticity
GO:0007613	0.00688404	0.0256	memory
GO:0031334	0.00693161	0.0259	positive regulation of protein-containing complex assembly
GO:2000179	0.00693161	0.0259	positive regulation of neural precursor cell proliferation
GO:0003014	0.00693161	0.026	renal system process
GO:0006753	0.00701384	0.026	nucleoside phosphate metabolic process
GO:0008286	0.00701432	0.026	insulin receptor signaling pathway
GO:0035172	0.00728606	0.0264	hemocyte proliferation
GO:0051965	0.00728606	0.0264	positive regulation of synapse assembly
GO:0005996	0.00734043	0.0264	monosaccharide metabolic process
GO:0032436	0.00728606	0.0265	positive regulation of proteasomal ubiquitin-dependent protein catabolic process
GO:0045862	0.00753771	0.0265	positive regulation of proteolysis
GO:0007034	0.00753771	0.0266	vacuolar transport
GO:0006915	0.00760259	0.0266	apoptotic process
GO:0051094	0.00774141	0.0266	positive regulation of developmental process
GO:0007254	0.00795531	0.027	JNK cascade
GO:0007315	0.00795531	0.027	pole plasm assembly
GO:1900073	0.0078331	0.0271	regulation of neuromuscular synaptic transmission
GO:0035148	0.00797948	0.0271	tube formation
GO:1901890	0.00797948	0.0271	positive regulation of cell junction assembly
GO:0008544	0.00811039	0.0274	epidermis development
GO:0019362	0.00811039	0.0274	pyridine nucleotide metabolic process
GO:0046496	0.00811039	0.0274	nicotinamide nucleotide metabolic process
GO:0061041	0.00809406	0.0275	regulation of wound healing
GO:0006898	0.00811039	0.0275	receptor-mediated endocytosis
GO:0007033	0.00811039	0.0275	vacuole organization
GO:0009792	0.00828627	0.0275	embryo development ending in birth or egg hatching
GO:0070887	0.00855465	0.0275	cellular response to chemical stimulus
GO:0035025	0.00809406	0.0276	positive regulation of Rho protein signal transduction
GO:0046011	0.00809406	0.0276	regulation of oskar mRNA translation
GO:0051897	0.00809406	0.0276	positive regulation of phosphatidylinositol 3-kinase/protein kinase B signal transduction
GO:0043062	0.00845924	0.0276	extracellular structure organization
GO:0072657	0.00853206	0.0276	protein localization to membrane
GO:0007417	0.00856263	0.0276	central nervous system development
GO:0006611	0.00809406	0.0277	protein export from nucleus
GO:0010907	0.00809406	0.0277	positive regulation of glucose metabolic process
GO:0035317	0.00871741	0.0281	imaginal disc-derived wing hair organization
GO:0007610	0.0087685	0.0281	behavior
GO:0060627	0.0087839	0.0282	regulation of vesicle-mediated transport
GO:0016318	0.0088083	0.0287	ommatidial rotation
GO:0000381	0.00898625	0.0287	regulation of alternative mRNA splicing, via spliceosome
GO:0000278	0.00927613	0.0288	mitotic cell cycle
GO:0009725	0.00920735	0.0289	response to hormone
GO:0007626	0.00925439	0.0289	locomotory behavior
GO:0046847	0.0095012	0.0293	filopodium assembly
GO:0035315	0.0095012	0.0294	hair cell differentiation
GO:0035316	0.0095012	0.0294	non-sensory hair organization
GO:0032869	0.00953694	0.0294	cellular response to insulin stimulus
GO:0048663	0.0095909	0.0295	neuron fate commitment
GO:0072091	0.00963709	0.0304	regulation of stem cell proliferation
GO:1905269	0.00963709	0.0304	positive regulation of chromatin organization
GO:0031453	0.00963709	0.0305	positive regulation of heterochromatin formation
GO:0062125	0.00963709	0.0305	regulation of mitochondrial gene expression
GO:0035011	0.00985947	0.031	melanotic encapsulation of foreign target
GO:0051222	0.00985947	0.031	positive regulation of protein transport
GO:1901096	0.00986964	0.0336	regulation of autophagosome maturation
GO:1903580	0.00986964	0.0336	positive regulation of ATP metabolic process
GO:0051590	0.00986964	0.0337	positive regulation of neurotransmitter transport
GO:0090382	0.00986964	0.0337	phagosome maturation
GO:0034059	0.00986964	0.0338	response to anoxia
GO:0050727	0.00986964	0.0338	regulation of inflammatory response
GO:0044242	0.0101119	0.0338	cellular lipid catabolic process
GO:0001956	0.00986964	0.0339	positive regulation of neurotransmitter secretion
GO:0120032	0.0103321	0.0339	regulation of plasma membrane bounded cell projection assembly
GO:0060491	0.0103321	0.034	regulation of cell projection assembly
GO:0007283	0.0103717	0.034	spermatogenesis
GO:0071375	0.0107117	0.0341	cellular response to peptide hormone stimulus
GO:0030111	0.0106217	0.0342	regulation of Wnt signaling pathway
GO:0051168	0.0107117	0.0342	nuclear export
GO:0007099	0.0109888	0.0346	centriole replication
GO:0030706	0.0109888	0.0346	germarium-derived oocyte differentiation
GO:0071456	0.0109888	0.0346	cellular response to hypoxia
GO:0009948	0.011056	0.0346	anterior/posterior axis specification
GO:0050954	0.011337	0.0347	sensory perception of mechanical stimulus
GO:0060249	0.011337	0.0347	anatomical structure homeostasis
GO:0042386	0.0112115	0.0348	hemocyte differentiation
GO:0043467	0.0112115	0.0348	regulation of generation of precursor metabolites and energy
GO:0022416	0.011337	0.0348	chaeta development
GO:0031396	0.0113396	0.0351	regulation of protein ubiquitination
GO:0031623	0.0113396	0.0351	receptor internalization
GO:0050878	0.0113396	0.0351	regulation of body fluid levels
GO:0010565	0.0113396	0.0352	regulation of cellular ketone metabolic process
GO:0051640	0.0114934	0.0353	organelle localization
GO:0009628	0.0118089	0.0355	response to abiotic stimulus
GO:0019318	0.0119882	0.0357	hexose metabolic process
GO:1901800	0.0121406	0.0359	positive regulation of proteasomal protein catabolic process
GO:2000060	0.0121406	0.0359	positive regulation of ubiquitin-dependent protein catabolic process
GO:0010632	0.0121406	0.036	regulation of epithelial cell migration
GO:0098534	0.0121982	0.036	centriole assembly
GO:0072524	0.0122191	0.036	pyridine-containing compound metabolic process
GO:0000122	0.0122689	0.036	negative regulation of transcription by RNA polymerase II
GO:0016042	0.0126176	0.036	lipid catabolic process
GO:0051169	0.0126176	0.036	nuclear transport
GO:0032868	0.0126661	0.036	response to insulin
GO:0006508	0.0124918	0.0361	proteolysis
GO:0006913	0.0126176	0.0361	nucleocytoplasmic transport
GO:0009267	0.0126661	0.0361	cellular response to starvation
GO:0045944	0.0124831	0.0362	positive regulation of transcription by RNA polymerase II
GO:0050769	0.0130238	0.0364	positive regulation of neurogenesis
GO:0036293	0.0130238	0.0365	response to decreased oxygen levels
GO:0045611	0.0132042	0.0375	negative regulation of hemocyte differentiation
GO:0070828	0.0132042	0.0375	heterochromatin organization
GO:0051017	0.0134895	0.0381	actin filament bundle assembly
GO:2001233	0.0134895	0.0381	regulation of apoptotic signaling pathway
GO:0007349	0.0135555	0.0381	cellularization
GO:0036294	0.0134895	0.0382	cellular response to decreased oxygen levels
GO:1905268	0.0135757	0.0409	negative regulation of chromatin organization
GO:1902656	0.0135757	0.041	calcium ion import into cytosol
GO:1903391	0.0135757	0.041	regulation of adherens junction organization
GO:1900544	0.0135757	0.0411	positive regulation of purine nucleotide metabolic process
GO:1902373	0.0135757	0.0411	negative regulation of mRNA catabolic process
GO:0140962	0.0135757	0.0412	multicellular organismal-level chemical homeostasis
GO:0150007	0.0135757	0.0412	clathrin-dependent synaptic vesicle endocytosis
GO:0098703	0.0135757	0.0413	calcium ion import across plasma membrane
GO:0061963	0.0135757	0.0414	regulation of entry into reproductive diapause
GO:0090435	0.0135757	0.0414	protein localization to nuclear envelope
GO:0048255	0.0135757	0.0415	mRNA stabilization
GO:0055116	0.0135757	0.0415	entry into reproductive diapause
GO:0046673	0.0135757	0.0416	negative regulation of compound eye retinal cell programmed cell death
GO:0048172	0.0135757	0.0416	regulation of short-term neuronal synaptic plasticity
GO:0043434	0.0141038	0.0416	response to peptide hormone
GO:0035151	0.0141524	0.0416	regulation of tube size, open tracheal system
GO:0045981	0.0135757	0.0417	positive regulation of nucleotide metabolic process
GO:0046671	0.0135757	0.0417	negative regulation of retinal cell programmed cell death
GO:0035262	0.0135757	0.0418	gonad morphogenesis
GO:0042326	0.0135757	0.0418	negative regulation of phosphorylation
GO:0033120	0.0135757	0.0419	positive regulation of RNA splicing
GO:0033238	0.0135757	0.0419	regulation of amine metabolic process
GO:0007605	0.0147432	0.0419	sensory perception of sound
GO:0048546	0.0147432	0.0419	digestive tract morphogenesis
GO:0031452	0.0135757	0.042	negative regulation of heterochromatin formation
GO:0071453	0.0148647	0.042	cellular response to oxygen levels
GO:0001933	0.0135757	0.0421	negative regulation of protein phosphorylation
GO:0046032	0.0148647	0.0421	ADP catabolic process
GO:0051489	0.0148647	0.0421	regulation of filopodium assembly
GO:0042063	0.0148648	0.0421	gliogenesis
GO:0009191	0.0148647	0.0422	ribonucleoside diphosphate catabolic process
GO:0036335	0.0148647	0.0422	intestinal stem cell homeostasis
GO:0009137	0.0148647	0.0423	purine nucleoside diphosphate catabolic process
GO:0009181	0.0148647	0.0423	purine ribonucleoside diphosphate catabolic process
GO:0006096	0.0148647	0.0424	glycolytic process
GO:0035099	0.0152331	0.0433	hemocyte migration
GO:0045937	0.0152331	0.0433	positive regulation of phosphate metabolic process
GO:0007390	0.0152331	0.0434	germ-band shortening
GO:0010562	0.0152331	0.0434	positive regulation of phosphorus metabolic process
GO:0034655	0.0152533	0.0434	nucleobase-containing compound catabolic process
GO:0072521	0.015723	0.044	purine-containing compound metabolic process
GO:1901185	0.0163252	0.0445	negative regulation of ERBB signaling pathway
GO:1904951	0.0163252	0.0445	positive regulation of establishment of protein localization
GO:0009134	0.0163252	0.0446	nucleoside diphosphate catabolic process
GO:0042059	0.0163252	0.0446	negative regulation of epidermal growth factor receptor signaling pathway
GO:0008347	0.0163252	0.0447	glial cell migration
GO:0090263	0.0163768	0.0447	positive regulation of canonical Wnt signaling pathway
GO:1901184	0.0163768	0.0447	regulation of ERBB signaling pathway
GO:0042058	0.0163768	0.0448	regulation of epidermal growth factor receptor signaling pathway
GO:0051225	0.0166142	0.0452	spindle assembly
GO:0006413	0.0166142	0.0453	translational initiation
GO:0042221	0.0172479	0.0454	response to chemical
GO:0001932	0.0174278	0.0467	regulation of protein phosphorylation
GO:1903829	0.0175714	0.0468	positive regulation of protein localization

## Sheet: Table S8
Table S8. Information of enriched gene ontologies for genes under convergent relaxation in invasive spider branches with significance.
go_id	Pvalue	adjusted-Pvalue	go_term
GO:0009987	1.2119e-16	0	cellular process
GO:0065007	3.68235e-10	0	biological regulation
GO:0050789	8.09689e-10	0	regulation of biological process
GO:0048518	8.45242e-10	0	positive regulation of biological process
GO:0050794	7.62638e-09	0	regulation of cellular process
GO:0071840	1.33717e-08	0	cellular component organization or biogenesis
GO:0048522	3.38581e-08	0	positive regulation of cellular process
GO:0008152	3.57503e-08	0	metabolic process
GO:0016043	9.94563e-08	0	cellular component organization
GO:0048583	1.34171e-07	0	regulation of response to stimulus
GO:0048523	1.79743e-07	0	negative regulation of cellular process
GO:0006996	2.55519e-07	0	organelle organization
GO:0051716	3.1033e-07	0	cellular response to stimulus
GO:0048519	3.14622e-07	0	negative regulation of biological process
GO:0010604	3.85518e-07	0	positive regulation of macromolecule metabolic process
GO:0009893	4.31493e-07	0	positive regulation of metabolic process
GO:0044085	6.24592e-07	0	cellular component biogenesis
GO:0040007	8.30812e-07	0	growth
GO:0044237	9.24094e-07	0	cellular metabolic process
GO:0010628	1.63059e-06	0	positive regulation of gene expression
GO:0022607	2.24488e-06	0	cellular component assembly
GO:0009056	2.58753e-06	0	catabolic process
GO:0048589	2.94761e-06	0	developmental growth
GO:0044238	3.64802e-06	0	primary metabolic process
GO:0050896	4.26644e-06	0	response to stimulus
GO:0048584	6.03016e-06	0	positive regulation of response to stimulus
GO:0080090	9.90985e-06	0	regulation of primary metabolic process
GO:0051246	9.9119e-06	0	regulation of protein metabolic process
GO:0051239	1.25461e-05	0	regulation of multicellular organismal process
GO:0019222	1.30767e-05	0	regulation of metabolic process
GO:0007154	1.44555e-05	0	cell communication
GO:0007165	1.67225e-05	0	signal transduction
GO:0016071	1.68686e-05	0	mRNA metabolic process
GO:0031325	1.89632e-05	0	positive regulation of cellular metabolic process
GO:0007005	1.90633e-05	0	mitochondrion organization
GO:0060255	2.26819e-05	0	regulation of macromolecule metabolic process
GO:0060560	2.30507e-05	0	developmental growth involved in morphogenesis
GO:0023052	2.37295e-05	0	signaling
GO:0044087	3.32093e-05	0	regulation of cellular component biogenesis
GO:0022008	3.42904e-05	0	neurogenesis
GO:0048731	3.65712e-05	0	system development
GO:0007611	0.00011678	0.0003	learning or memory
GO:0033036	0.000118221	0.0003	macromolecule localization
GO:0031328	5.74737e-05	0.0004	positive regulation of cellular biosynthetic process
GO:0006396	5.88302e-05	0.0004	RNA processing
GO:0006950	6.59205e-05	0.0004	response to stress
GO:0042440	6.65607e-05	0.0004	pigment metabolic process
GO:0009891	6.66188e-05	0.0004	positive regulation of biosynthetic process
GO:0008306	6.84193e-05	0.0004	associative learning
GO:0007166	7.76718e-05	0.0004	cell surface receptor signaling pathway
GO:0048513	8.83471e-05	0.0004	animal organ development
GO:0046822	9.38286e-05	0.0004	regulation of nucleocytoplasmic transport
GO:0031323	9.47884e-05	0.0004	regulation of cellular metabolic process
GO:0007399	9.67716e-05	0.0004	nervous system development
GO:0010557	0.000106007	0.0004	positive regulation of macromolecule biosynthetic process
GO:0016049	0.000108155	0.0004	cell growth
GO:0008104	4.18345e-05	0.0005	protein localization
GO:0080134	4.50603e-05	0.0005	regulation of response to stress
GO:0032386	5.02981e-05	0.0005	regulation of intracellular transport
GO:0048699	0.000123565	0.0006	generation of neurons
GO:0043436	0.00012516	0.0006	oxoacid metabolic process
GO:0009967	0.000121493	0.0007	positive regulation of signal transduction
GO:0050890	0.000122733	0.0007	cognition
GO:0035011	0.000129245	0.0009	melanotic encapsulation of foreign target
GO:0006082	0.000138145	0.0009	organic acid metabolic process
GO:0008355	0.000139025	0.0009	olfactory learning
GO:0048588	0.000143992	0.0009	developmental cell growth
GO:0002252	0.000165021	0.0011	immune effector process
GO:0008285	0.000156941	0.0012	negative regulation of cell population proliferation
GO:0040008	0.000164805	0.0012	regulation of growth
GO:0051960	0.00017238	0.0014	regulation of nervous system development
GO:2000026	0.000173854	0.0014	regulation of multicellular organismal development
GO:0061640	0.000174611	0.0014	cytoskeleton-dependent cytokinesis
GO:0051247	0.00017655	0.0016	positive regulation of protein metabolic process
GO:0070727	0.000176584	0.0016	cellular macromolecule localization
GO:0048869	0.000208213	0.0023	cellular developmental process
GO:0030154	0.000205581	0.0024	cell differentiation
GO:0050688	0.000233901	0.0026	regulation of defense response to virus
GO:0007612	0.000236587	0.0028	learning
GO:0016477	0.000297141	0.0051	cell migration
GO:0072359	0.000278453	0.0052	circulatory system development
GO:0042067	0.000285181	0.0052	establishment of ommatidial planar polarity
GO:0007507	0.000278453	0.0053	heart development
GO:0048468	0.000260037	0.0054	cell development
GO:0051649	0.000273724	0.0054	establishment of localization in cell
GO:0009966	0.000256982	0.0055	regulation of signal transduction
GO:0000910	0.000315969	0.0059	cytokinesis
GO:0000902	0.0003066	0.006	cell morphogenesis
GO:0035556	0.000321449	0.006	intracellular signal transduction
GO:0023056	0.000316617	0.0061	positive regulation of signaling
GO:0006790	0.000337034	0.0061	sulfur compound metabolic process
GO:0010647	0.000332858	0.0062	positive regulation of cell communication
GO:0006606	0.000343666	0.0062	protein import into nucleus
GO:0051169	0.000363182	0.0062	nuclear transport
GO:0006913	0.000363182	0.0063	nucleocytoplasmic transport
GO:0051961	0.000345989	0.0064	negative regulation of nervous system development
GO:0019752	0.000392301	0.0067	carboxylic acid metabolic process
GO:0051301	0.000398641	0.0067	cell division
GO:0006139	0.000383551	0.0068	nucleobase-containing compound metabolic process
GO:0051170	0.000411144	0.0068	import into nucleus
GO:0048666	0.00041382	0.0071	neuron development
GO:0065003	0.000415306	0.0072	protein-containing complex assembly
GO:0051641	0.000415142	0.0073	cellular localization
GO:0016054	0.00042808	0.0075	organic acid catabolic process
GO:0046395	0.00042808	0.0075	carboxylic acid catabolic process
GO:0043062	0.000428991	0.0075	extracellular structure organization
GO:0120039	0.000516243	0.0075	plasma membrane bounded cell projection morphogenesis
GO:0051093	0.000549354	0.0075	negative regulation of developmental process
GO:0009892	0.00054943	0.0075	negative regulation of metabolic process
GO:0045880	0.000598182	0.0075	positive regulation of smoothened signaling pathway
GO:0008589	0.00060202	0.0075	regulation of smoothened signaling pathway
GO:0016070	0.00061086	0.0075	RNA metabolic process
GO:0048732	0.000424839	0.0076	gland development
GO:0050768	0.000428832	0.0076	negative regulation of neurogenesis
GO:0048638	0.000482032	0.0076	regulation of developmental growth
GO:0051128	0.000506872	0.0076	regulation of cellular component organization
GO:0048858	0.000542277	0.0076	cell projection morphogenesis
GO:0033554	0.000595883	0.0076	cellular response to stress
GO:1901615	0.000604447	0.0076	organic hydroxy compound metabolic process
GO:0030182	0.000423644	0.0077	neuron differentiation
GO:0048812	0.000491297	0.0077	neuron projection morphogenesis
GO:0070647	0.000506187	0.0077	protein modification by small protein conjugation or removal
GO:0035010	0.000536992	0.0077	encapsulation of foreign target
GO:0031175	0.000592289	0.0077	neuron projection development
GO:0044248	0.00059295	0.0077	cellular catabolic process
GO:0010721	0.000664454	0.0079	negative regulation of cell development
GO:0009894	0.000670725	0.0079	regulation of catabolic process
GO:0043068	0.000685062	0.0079	positive regulation of programmed cell death
GO:0030097	0.000685062	0.008	hemopoiesis
GO:0009889	0.00083357	0.0104	regulation of biosynthetic process
GO:0045596	0.000729854	0.0105	negative regulation of cell differentiation
GO:0044282	0.000745678	0.0105	small molecule catabolic process
GO:0043687	0.000771655	0.0105	post-translational protein modification
GO:0030258	0.000790253	0.0105	lipid modification
GO:0080164	0.000725866	0.0106	regulation of nitric oxide metabolic process
GO:0050793	0.000736988	0.0106	regulation of developmental process
GO:0043412	0.000765636	0.0106	macromolecule modification
GO:0030198	0.000790253	0.0106	extracellular matrix organization
GO:0065008	0.000866439	0.0106	regulation of biological quality
GO:0034504	0.000917526	0.0106	protein localization to nucleus
GO:0043933	0.000959685	0.0106	protein-containing complex organization
GO:0060148	0.000725866	0.0107	positive regulation of post-transcriptional gene silencing
GO:0002230	0.000752898	0.0107	positive regulation of defense response to virus by host
GO:0050691	0.000752898	0.0107	regulation of defense response to virus by host
GO:0007155	0.000896322	0.0107	cell adhesion
GO:0010556	0.000957019	0.0107	regulation of macromolecule biosynthetic process
GO:0001661	0.000725866	0.0108	conditioned taste aversion
GO:0048675	0.00098569	0.0108	axon extension
GO:0090328	0.000967478	0.0109	regulation of olfactory learning
GO:0018193	0.00098569	0.0109	peptidyl-amino acid modification
GO:0007224	0.00098978	0.011	smoothened signaling pathway
GO:0120036	0.00112229	0.0123	plasma membrane bounded cell projection organization
GO:0006417	0.00108728	0.0124	regulation of translation
GO:0090304	0.00121693	0.0125	nucleic acid metabolic process
GO:0031326	0.0012109	0.0126	regulation of cellular biosynthetic process
GO:0007423	0.00119806	0.0127	sensory organ development
GO:1990138	0.00129327	0.0127	neuron projection extension
GO:0009887	0.00130758	0.0127	animal organ morphogenesis
GO:0008380	0.00132516	0.0127	RNA splicing
GO:0048749	0.00117921	0.0128	compound eye development
GO:0048667	0.00119655	0.0128	cell morphogenesis involved in neuron differentiation
GO:0016925	0.00121714	0.0128	protein sumoylation
GO:0036211	0.00124643	0.0128	protein modification process
GO:0043603	0.00128855	0.0128	amide metabolic process
GO:0010646	0.00130836	0.0128	regulation of cell communication
GO:0016318	0.00132699	0.0128	ommatidial rotation
GO:0009968	0.00117921	0.0129	negative regulation of signal transduction
GO:0140694	0.00118849	0.0129	non-membrane-bounded organelle assembly
GO:0023051	0.00123214	0.0129	regulation of signaling
GO:0097485	0.00124452	0.0129	neuron projection guidance
GO:0007112	0.00132699	0.0129	male meiosis cytokinesis
GO:0034654	0.00117916	0.013	nucleobase-containing compound biosynthetic process
GO:0048585	0.00140291	0.0131	negative regulation of response to stimulus
GO:0032774	0.00141607	0.0131	RNA biosynthetic process
GO:0030030	0.00142933	0.0131	cell projection organization
GO:1905038	0.00143671	0.0152	regulation of membrane lipid metabolic process
GO:0097222	0.00143671	0.0153	mitochondrial mRNA polyadenylation
GO:0043484	0.00147024	0.0153	regulation of RNA splicing
GO:0090153	0.00143671	0.0154	regulation of sphingolipid biosynthetic process
GO:0001738	0.00147024	0.0154	morphogenesis of a polarized epithelium
GO:0051923	0.00143671	0.0155	sulfation
GO:0032502	0.00156256	0.0155	developmental process
GO:0045056	0.00143671	0.0156	transcytosis
GO:0051049	0.0015436	0.0156	regulation of transport
GO:0072329	0.00153432	0.0157	monocarboxylic acid catabolic process
GO:0008283	0.00161518	0.0157	cell population proliferation
GO:0051241	0.00171242	0.0157	negative regulation of multicellular organismal process
GO:0006796	0.00151219	0.0158	phosphate-containing compound metabolic process
GO:0018958	0.00169594	0.0158	phenol-containing compound metabolic process
GO:0007275	0.00180489	0.0158	multicellular organism development
GO:0006793	0.00151219	0.0159	phosphorus metabolic process
GO:0001745	0.00151215	0.016	compound eye morphogenesis
GO:0031399	0.00180687	0.0161	regulation of protein modification process
GO:0140861	0.00182966	0.0163	DNA repair-dependent chromatin remodeling
GO:0046856	0.00182966	0.0164	phosphatidylinositol dephosphorylation
GO:0010648	0.00201486	0.0165	negative regulation of cell communication
GO:0016192	0.00198425	0.0166	vesicle-mediated transport
GO:0048568	0.0019557	0.0167	embryonic organ development
GO:0141187	0.00206478	0.0167	nucleic acid biosynthetic process
GO:0043170	0.00214469	0.0167	macromolecule metabolic process
GO:0061564	0.00190703	0.0168	axon development
GO:0046907	0.00192953	0.0168	intracellular transport
GO:0098609	0.00213792	0.0168	cell-cell adhesion
GO:0010629	0.00218514	0.0168	negative regulation of gene expression
GO:0023057	0.00192657	0.0169	negative regulation of signaling
GO:0051304	0.00210269	0.0169	chromosome separation
GO:0072659	0.0021133	0.0169	protein localization to plasma membrane
GO:0035006	0.0021133	0.017	melanization defense response
GO:0150063	0.00225054	0.0173	visual system development
GO:0048870	0.00230787	0.0173	cell motility
GO:1903311	0.00232659	0.0173	regulation of mRNA metabolic process
GO:0001654	0.00225054	0.0174	eye development
GO:0048880	0.00225054	0.0174	sensory system development
GO:0048285	0.00221518	0.0175	organelle fission
GO:0010605	0.00220203	0.0176	negative regulation of macromolecule metabolic process
GO:0097250	0.00244174	0.0207	mitochondrial respirasome assembly
GO:0090596	0.00238407	0.0208	sensory organ morphogenesis
GO:0048592	0.00238407	0.0209	eye morphogenesis
GO:0010468	0.00252163	0.0211	regulation of gene expression
GO:0070925	0.0025088	0.0212	organelle assembly
GO:0032501	0.00259762	0.0213	multicellular organismal process
GO:0009057	0.00277771	0.0213	macromolecule catabolic process
GO:0044281	0.00274235	0.0214	small molecule metabolic process
GO:0032101	0.00266561	0.0215	regulation of response to external stimulus
GO:0022402	0.00269491	0.0215	cell cycle process
GO:0042221	0.00265825	0.0216	response to chemical
GO:0002702	0.00264168	0.0217	positive regulation of production of molecular mediator of immune response
GO:0002699	0.00264168	0.0218	positive regulation of immune effector process
GO:0002225	0.00264168	0.0219	positive regulation of antimicrobial peptide production
GO:0002376	0.00289369	0.0219	immune system process
GO:0042127	0.00295593	0.0219	regulation of cell population proliferation
GO:0007409	0.00296174	0.0219	axonogenesis
GO:0006401	0.00297589	0.0219	RNA catabolic process
GO:0006582	0.00304327	0.0219	melanin metabolic process
GO:0072375	0.00260513	0.022	medium-term memory
GO:0006397	0.00288849	0.022	mRNA processing
GO:0007411	0.00306115	0.0225	axon guidance
GO:0000963	0.00305808	0.0226	mitochondrial RNA processing
GO:0006886	0.00315063	0.0227	intracellular protein transport
GO:0033043	0.00319065	0.0227	regulation of organelle organization
GO:0051607	0.00325977	0.023	defense response to virus
GO:0002922	0.00325977	0.0231	positive regulation of humoral immune response
GO:0002760	0.00325977	0.0232	positive regulation of antimicrobial humoral response
GO:0000280	0.00343379	0.0232	nuclear division
GO:0019748	0.00341084	0.0233	secondary metabolic process
GO:0007367	0.00345271	0.0234	segment polarity determination
GO:0009791	0.00346737	0.0234	post-embryonic development
GO:2001057	0.00351794	0.0261	reactive nitrogen species metabolic process
GO:0046209	0.00351794	0.0262	nitric oxide metabolic process
GO:0030199	0.00351794	0.0263	collagen fibril organization
GO:1904893	0.00355646	0.0263	negative regulation of receptor signaling pathway via STAT
GO:0046426	0.00355646	0.0264	negative regulation of receptor signaling pathway via JAK-STAT
GO:0000965	0.00351794	0.0265	mitochondrial RNA 3'-end processing
GO:0036098	0.00355646	0.0265	male germ-line stem cell population maintenance
GO:0040029	0.00368624	0.0265	epigenetic regulation of gene expression
GO:0031324	0.00374318	0.0265	negative regulation of cellular metabolic process
GO:0048856	0.00367698	0.0266	anatomical structure development
GO:0032446	0.00378954	0.0269	protein modification by small protein conjugation
GO:0009605	0.00401946	0.0269	response to external stimulus
GO:0032981	0.00377961	0.027	mitochondrial respiratory chain complex I assembly
GO:0032879	0.00388862	0.027	regulation of localization
GO:0044057	0.00397572	0.027	regulation of system process
GO:0015031	0.00397612	0.027	protein transport
GO:0008033	0.00399083	0.027	tRNA processing
GO:0032103	0.00421061	0.027	positive regulation of response to external stimulus
GO:0006836	0.00422113	0.027	neurotransmitter transport
GO:0010257	0.00377961	0.0271	NADH dehydrogenase complex assembly
GO:0042048	0.00419948	0.0271	olfactory behavior
GO:1990778	0.00423752	0.0271	protein localization to cell periphery
GO:0044255	0.00424827	0.0271	cellular lipid metabolic process
GO:0009888	0.00434813	0.0271	tissue development
GO:0007164	0.00419948	0.0272	establishment of tissue polarity
GO:0002831	0.00414634	0.0273	regulation of response to biotic stimulus
GO:0001736	0.00419948	0.0273	establishment of planar polarity
GO:0001932	0.00410164	0.0274	regulation of protein phosphorylation
GO:0051174	0.00412687	0.0274	regulation of phosphorus metabolic process
GO:0019220	0.00412687	0.0275	regulation of phosphate metabolic process
GO:0007266	0.00449507	0.0278	Rho protein signal transduction
GO:0045184	0.00454033	0.028	establishment of protein localization
GO:0051276	0.00466775	0.0281	chromosome organization
GO:0032508	0.00469486	0.029	DNA duplex unwinding
GO:0018205	0.00469486	0.0291	peptidyl-lysine modification
GO:0006402	0.0047854	0.0291	mRNA catabolic process
GO:2000144	0.00487434	0.0323	positive regulation of DNA-templated transcription initiation
GO:0060261	0.00487434	0.0324	positive regulation of transcription initiation by RNA polymerase II
GO:0035207	0.00487434	0.0325	negative regulation of hemocyte proliferation
GO:0034334	0.00487434	0.0326	adherens junction maintenance
GO:0006984	0.00487434	0.0327	ER-nucleus signaling pathway
GO:0031099	0.00488476	0.0327	regeneration
GO:0032787	0.00510449	0.0327	monocarboxylic acid metabolic process
GO:0031347	0.0049394	0.0328	regulation of defense response
GO:0043065	0.00509654	0.0329	positive regulation of apoptotic process
GO:0050767	0.00519197	0.0332	regulation of neurogenesis
GO:0060341	0.00521629	0.0333	regulation of cellular localization
GO:0035272	0.00536559	0.0335	exocrine system development
GO:0009653	0.00531962	0.0336	anatomical structure morphogenesis
GO:0007431	0.00536559	0.0336	salivary gland development
GO:0042325	0.00533729	0.0337	regulation of phosphorylation
GO:0042246	0.00533729	0.0338	tissue regeneration
GO:0019637	0.00542618	0.0338	organophosphate metabolic process
GO:0002682	0.00542764	0.0338	regulation of immune system process
GO:0051130	0.00571276	0.0338	positive regulation of cellular component organization
GO:0030032	0.00533729	0.0339	lamellipodium assembly
GO:0140546	0.00564444	0.0339	defense response to symbiont
GO:0033206	0.00573082	0.0341	meiotic cytokinesis
GO:0051248	0.00584981	0.0342	negative regulation of protein metabolic process
GO:0097581	0.00603	0.0354	lamellipodium organization
GO:0035050	0.00603	0.0355	embryonic heart tube development
GO:0033157	0.00603	0.0357	regulation of intracellular protein transport
GO:0032392	0.00603	0.0358	DNA geometric change
GO:1900424	0.00617	0.0358	regulation of defense response to bacterium
GO:0031644	0.00603	0.0359	regulation of nervous system process
GO:0000398	0.00631839	0.0359	mRNA splicing, via spliceosome
GO:0000377	0.00631839	0.036	RNA splicing, via transesterification reactions with bulged adenosine as nucleophile
GO:0141188	0.00640648	0.036	nucleic acid catabolic process
GO:0000375	0.00631839	0.0361	RNA splicing, via transesterification reactions
GO:0009615	0.00642468	0.0361	response to virus
GO:0007049	0.00623928	0.0362	cell cycle
GO:0010608	0.00623664	0.0364	post-transcriptional regulation of gene expression
GO:0097320	0.0064322	0.0388	plasma membrane tubulation
GO:0071481	0.0064322	0.0389	cellular response to X-ray
GO:0033119	0.0064322	0.039	negative regulation of RNA splicing
GO:0007415	0.0064322	0.0391	defasciculation of motor neuron axon
GO:0001934	0.0064322	0.0392	positive regulation of protein phosphorylation
GO:0045727	0.00666934	0.0392	positive regulation of translation
GO:0032506	0.00666934	0.0393	cytokinetic process
GO:0141124	0.00701504	0.0397	intracellular signaling cassette
GO:0060284	0.00684575	0.0398	regulation of cell development
GO:0006952	0.00686649	0.0398	defense response
GO:0046839	0.00677396	0.0399	phospholipid dephosphorylation
GO:0044089	0.0068215	0.0399	positive regulation of cellular component biogenesis
GO:0051254	0.00735755	0.04	positive regulation of RNA metabolic process
GO:0033627	0.00677396	0.0401	cell adhesion mediated by integrin
GO:0051240	0.0071189	0.0401	positive regulation of multicellular organismal process
GO:0044419	0.00733378	0.0401	biological process involved in interspecies interaction between organisms
GO:0051225	0.00717228	0.0402	spindle assembly
GO:0035316	0.00717455	0.0402	non-sensory hair organization
GO:0072657	0.00730745	0.0402	protein localization to membrane
GO:0033108	0.00717228	0.0404	mitochondrial respiratory chain complex assembly
GO:0035315	0.00717455	0.0404	hair cell differentiation
GO:0048813	0.00779226	0.0412	dendrite morphogenesis
GO:0007365	0.00770439	0.0413	periodic partitioning
GO:0007088	0.00770439	0.0414	regulation of mitotic nuclear division
GO:0006749	0.00770439	0.0415	glutathione metabolic process
GO:0002833	0.00804355	0.0418	positive regulation of response to biotic stimulus
GO:0060147	0.00818492	0.0441	regulation of post-transcriptional gene silencing
GO:0060429	0.00820203	0.0441	epithelium development
GO:0051255	0.00818492	0.0442	spindle midzone assembly
GO:0046823	0.00818492	0.0444	negative regulation of nucleocytoplasmic transport
GO:0045217	0.00818492	0.0445	cell-cell junction maintenance
GO:0010592	0.00818492	0.0446	positive regulation of lamellipodium assembly
GO:0009058	0.00846913	0.0454	biosynthetic process
GO:0017148	0.00884578	0.046	negative regulation of translation
GO:0031349	0.00911003	0.0464	positive regulation of defense response
GO:0140014	0.0101104	0.047	mitotic nuclear division
GO:0019219	0.0100703	0.0471	regulation of nucleobase-containing compound metabolic process
GO:1901606	0.0100793	0.0471	alpha-amino acid catabolic process
GO:0002784	0.00977603	0.0472	regulation of antimicrobial peptide production
GO:0009607	0.00989061	0.0472	response to biotic stimulus
GO:0051783	0.0100793	0.0472	regulation of nuclear division
GO:0007059	0.010084	0.0472	chromosome segregation
GO:0030155	0.0100793	0.0473	regulation of cell adhesion
GO:0002775	0.00977603	0.0474	antimicrobial peptide production
GO:0051707	0.00974004	0.0475	response to other organism
GO:0043207	0.00974004	0.0476	response to external biotic stimulus
GO:0022603	0.00968127	0.0477	regulation of anatomical structure morphogenesis
GO:0061844	0.0102654	0.049	antimicrobial humoral immune response mediated by antimicrobial peptide
GO:1902745	0.0101261	0.0491	positive regulation of lamellipodium organization
GO:0002700	0.0102654	0.0491	regulation of production of molecular mediator of immune response
GO:0042327	0.0101261	0.0492	positive regulation of phosphorylation
GO:0002440	0.0102654	0.0493	production of molecular mediator of immune response
GO:0042306	0.0101261	0.0494	regulation of protein import into nucleus
GO:0031401	0.0102791	0.0494	positive regulation of protein modification process
GO:0036090	0.0101261	0.0495	cleavage furrow ingression
GO:0031334	0.0102791	0.0495	positive regulation of protein-containing complex assembly
GO:0098542	0.0105728	0.0495	defense response to other organism
GO:0035001	0.0101261	0.0496	dorsal trunk growth, open tracheal system
GO:0031507	0.010458	0.0496	heterochromatin formation
GO:0007614	0.0102791	0.0497	short-term memory
GO:0007349	0.0106924	0.0497	cellularization
GO:0006964	0.0101261	0.0498	positive regulation of biosynthetic process of antibacterial peptides active against Gram-negative bacteria
GO:0022604	0.0107714	0.0499	regulation of cell morphogenesis

## Sheet: Table S9
Table S9. Information of genes under convergent positive selection in invasive spider branches.
ogg_id	Pvalue-non-invasive	Pvalue-invasive	Pvalue-between	adjusted-Pvalue-non-invasive	adjusted-Pvalue-invasive	adjusted-Pvalue-between	gene
OG0000308	0.5	0	0	0.5	0	0	glutathione S-transferase Mu 1 [Trichonephila inaurata madagascariensis]
OG0001132	0.0756	0	0	0.231072	0	0	60S ribosomal protein L9 [Trichonephila inaurata madagascariensis]
OG0001526	0.5	0	0	0.5	0	0	atrial natriuretic peptide receptor 2 [Trichonephila inaurata madagascariensis]
OG0001769	0.5	0	0	0.5	0	0	hypothetical protein TNIN_212031 [Trichonephila inaurata madagascariensis]
OG0001829	0.5	0	0	0.5	0	0	quinone oxidoreductase [Trichonephila inaurata madagascariensis]
OG0001884	0.5	0	0	0.5	0	0	myocardin-related transcription factor B, partial [Trichonephila inaurata madagascariensis]
OG0001965	0.5	0	0	0.5	0	0	hypothetical protein TNIN_327091 [Trichonephila inaurata madagascariensis]
OG0002080	0.5	0	0	0.5	0	0	hypothetical protein TNIN_235942 [Trichonephila inaurata madagascariensis]
OG0002176	0.5	0	0	0.5	0	0	metastasis-associated protein MTA1 [Trichonephila inaurata madagascariensis]
OG0002225	0.5	0	0	0.5	0	0	hypothetical protein TNIN_308741 [Trichonephila inaurata madagascariensis]
OG0002227	0.5	0	0	0.5	0	0	protein roadkill [Trichonephila inaurata madagascariensis]
OG0002297	0.1042	0	0	0.294495	0	0	glutamate receptor [Trichonephila inaurata madagascariensis]
OG0002345	0.5	0	0	0.5	0	0	ras-related protein Rab-18A [Trichonephila inaurata madagascariensis]
OG0002711	0.5	0	0	0.5	0	0	nose resistant to fluoxetine protein 6 [Trichonephila inaurata madagascariensis]
OG0003386	0.5	0	0	0.5	0	0	n-alpha-acetyltransferase 35, NatC auxiliary subunit, partial [Trichonephila inaurata madagascariensis]
OG0003588	0.5	0	0	0.5	0	0	glutathione peroxidase 3 [Trichonephila inaurata madagascariensis]
OG0003830	0.086	0	0	0.255148	0	0	40S ribosomal protein S9 [Trichonephila inaurata madagascariensis]
OG0003927	0.4935	0	0	0.5	0	0	MFS-type transporter SLC18B1 [Trichonephila inaurata madagascariensis]
OG0004292	0.261	0	0	0.5	0	0	structural maintenance of chromosomes protein 1A [Trichonephila inaurata madagascariensis]
OG0004377	0.2809	0	0	0.5	0	0	homocysteine-responsive endoplasmic reticulum-resident ubiquitin-like domain member 2 protein [Trichonephila inaurata madagascariensis]
OG0004381	0.5	0	0	0.5	0	0	EF-hand domain-containing protein [Trichonephila inaurata madagascariensis]
OG0004438	0.0547	0	0	0.176222	0	0	coiled-coil domain-containing protein CG32809 [Trichonephila inaurata madagascariensis]
OG0004531	0.5	0	0	0.5	0	0	PX domain-containing protein kinase-like protein [Trichonephila inaurata madagascariensis]
OG0004670	0.5	0	0	0.5	0	0	solute carrier organic anion transporter family member 4A1 [Trichonephila inaurata madagascariensis]
OG0004686	0.4956	0	0	0.5	0	0	methionine--tRNA ligase, cytoplasmic [Trichonephila inaurata madagascariensis]
OG0004808	0.5	0	0	0.5	0	0	mitochondrial Rho GTPase 1-A [Trichonephila inaurata madagascariensis]
OG0004818	0.5	0	0	0.5	0	0	e3 ubiquitin-protein ligase MARCHF8 [Trichonephila inaurata madagascariensis]
OG0004893	0.1042	0	0	0.294495	0	0	nose resistant to fluoxetine protein 6 [Trichonephila inaurata madagascariensis]
OG0005026	0.5	0	0	0.5	0	0	2-hydroxyacyl-CoA lyase 2 [Trichonephila inaurata madagascariensis]
OG0005176	0.1284	0	0	0.346471	0	0	hypothetical protein TNIN_464531 [Trichonephila inaurata madagascariensis]
OG0005322	0.5	0	0	0.5	0	0	26S proteasome regulatory subunit 6A [Trichonephila inaurata madagascariensis]
OG0005365	0.5	0	0	0.5	0	0	nucleoporin p54 [Trichonephila inaurata madagascariensis]
OG0006066	0.5	0	0	0.5	0	0	phosphomevalonate kinase [Trichonephila inaurata madagascariensis]
OG0006101	0.3232	0	0	0.5	0	0	actin-binding Rho-activating protein [Trichonephila inaurata madagascariensis]
OG0006193	0.4842	0	0	0.5	0	0	ninjurin-1 [Trichonephila inaurata madagascariensis]
OG0006887	0.3883	0	0	0.5	0	0	MOG interacting and ectopic P-granules protein 1 [Trichonephila inaurata madagascariensis]
OG0006957	0.2711	0	0	0.5	0	0	alpha-1,3-mannosyl-glycoprotein 2-beta-N-acetylglucosaminyltransferase [Trichonephila inaurata madagascariensis]
OG0007031	0.5	0	0	0.5	0	0	oxysterol-binding protein 1 [Trichonephila inaurata madagascariensis]
OG0007105	0.5	0	0	0.5	0	0	hypothetical protein TNIN_44851 [Trichonephila inaurata madagascariensis]
OG0007121	0.5	0	0	0.5	0	0	brain-specific angiogenesis inhibitor 1-associated protein 2 [Trichonephila inaurata madagascariensis]
OG0007531	0.5	0	0	0.5	0	0	golgi resident protein GCP60 [Trichonephila inaurata madagascariensis]
OG0007599	0.5	0	0	0.5	0	0	transposable element Hobo transposase [Trichonephila inaurata madagascariensis]
OG0007750	0.2918	0	0	0.5	0	0	proline-rich protein PRCC [Trichonephila inaurata madagascariensis]
OG0007783	0.5	0	0	0.5	0	0	glycosylated lysosomal membrane protein [Trichonephila inaurata madagascariensis]
OG0007857	0.056	0	0	0.180077	0	0	programmed cell death 6-interacting protein [Trichonephila inaurata madagascariensis]
OG0007999	0.5	0	0	0.5	0	0	trifunctional enzyme subunit alpha, mitochondrial [Trichonephila inaurata madagascariensis]
OG0008148	0.4675	0	0	0.5	0	0	t-cell immunomodulatory protein [Trichonephila inaurata madagascariensis]
OG0008232	0.0658	0	0	0.206175	0	0	maspardin [Trichonephila inaurata madagascariensis]
OG0008397	0.4056	0	0	0.5	0	0	2-hydroxyacyl-CoA lyase 1 [Trichonephila inaurata madagascariensis]
OG0008432	0.5	0	0	0.5	0	0	BICD family-like cargo adapter 1 [Trichonephila inaurata madagascariensis]
OG0008637	0.5	0	0	0.5	0	0	uncharacterized protein TNCV_4177151 [Trichonephila clavipes]
OG0008663	0.5	0	0	0.5	0	0	serine proteinase stubble [Trichonephila inaurata madagascariensis]
OG0008763	0.5	0	0	0.5	0	0	UBX domain-containing protein 4 [Trichonephila inaurata madagascariensis]
OG0008791	0.0782	0	0	0.236737	0	0	la-related protein 7 [Trichonephila inaurata madagascariensis]
OG0008880	0.1089	0	0	0.303597	0	0	hypothetical protein TNIN_429371 [Trichonephila inaurata madagascariensis]
OG0009091	0.5	0	0	0.5	0	0	hypothetical protein TNIN_436661 [Trichonephila inaurata madagascariensis]
OG0009558	0.3223	0	0	0.5	0	0	n(6)-adenine-specific methyltransferase METTL4 [Trichonephila inaurata madagascariensis]
OG0009564	0.5	0	0	0.5	0	0	protein YIPF1 [Trichonephila inaurata madagascariensis]
OG0009967	0.5	0	0	0.5	0	0	electron transfer flavoprotein subunit beta [Trichonephila inaurata madagascariensis]
OG0009984	0.5	0	0	0.5	0	0	CCDC92 domain-containing protein [Trichonephila inaurata madagascariensis]
OG0010002	0.5	0	0	0.5	0	0	mitochondrial tRNA-specific 2-thiouridylase 1 [Trichonephila inaurata madagascariensis]
OG0010303	0.5	0	0	0.5	0	0	coiled-coil domain-containing protein 25 [Trichonephila inaurata madagascariensis]
OG0010408	0.5	0	0	0.5	0	0	MADF domain-containing protein [Trichonephila inaurata madagascariensis]
OG0010444	0.4536	0	0	0.5	0	0	RNA-binding protein 8A [Trichonephila inaurata madagascariensis]
OG0010488	0.5	0	0	0.5	0	0	eukaryotic translation initiation factor 3 subunit K [Trichonephila inaurata madagascariensis]
OG0010830	0.2536	0	0	0.5	0	0	MICOS complex subunit MIC13 [Trichonephila inaurata madagascariensis]
OG0007645	0.0598	0.0002	0	0.190541	0.00528636	0	histone deacetylase 3 [Trichonephila inaurata madagascariensis]
OG0007761	0.0947	0.0006	0	0.274997	0.014097	0	hypothetical protein TNIN_392601 [Trichonephila inaurata madagascariensis]
OG0002726	0.5	0.0007	0	0.5	0.0159107	0	RNA-binding protein 24 [Trichonephila inaurata madagascariensis]
OG0007023	0.5	0.0013	0	0.5	0.0270788	0	multidrug resistance-associated protein 7 [Trichonephila inaurata madagascariensis]
OG0010517	0.2538	0.0013	0	0.5	0.0270788	0	proteasome subunit beta type-3 [Trichonephila inaurata madagascariensis]
OG0007052	0.5	0.0014	0	0.5	0.0287329	0	protein transport protein Sec24D [Trichonephila inaurata madagascariensis]
OG0002122	0.5	0.0022	0	0.5	0.0424077	0	2-aminomuconic semialdehyde dehydrogenase [Trichonephila inaurata madagascariensis]
OG0009622	0.4422	0.0024	0	0.5	0.0458827	0	26S proteasome non-ATPase regulatory subunit 6 [Trichonephila inaurata madagascariensis]
OG0000721	0.1294	0	0.0001	0.348496	0	0.00197677	acetoacetyl-CoA synthetase, partial [Trichonephila inaurata madagascariensis]
OG0002369	0.4581	0	0.0001	0.5	0	0.00197677	cytochrome P450 3A9 [Trichonephila inaurata madagascariensis]
OG0002395	0.5	0	0.0001	0.5	0	0.00197677	dynamin [Trichonephila inaurata madagascariensis]
OG0002970	0.1239	0	0.0001	0.336279	0	0.00197677	ras GTPase-activating protein raskol [Trichonephila inaurata madagascariensis]
OG0003024	0.2395	0	0.0001	0.5	0	0.00197677	c2H2-type domain-containing protein [Trichonephila inaurata madagascariensis]
OG0004469	0.5	0	0.0001	0.5	0	0.00197677	vesicle-fusing ATPase 1 [Trichonephila inaurata madagascariensis]
OG0004475	0.5	0	0.0001	0.5	0	0.00197677	lysophosphatidylserine lipase ABHD12 [Trichonephila inaurata madagascariensis]
OG0005415	0.1711	0	0.0001	0.43766	0	0.00197677	protein big brother [Trichonephila inaurata madagascariensis]
OG0006962	0.5	0	0.0001	0.5	0	0.00197677	tetratricopeptide repeat protein 38 [Trichonephila inaurata madagascariensis]
OG0007189	0.4918	0	0.0001	0.5	0	0.00197677	[Pyruvate dehydrogenase [Trichonephila inaurata madagascariensis]
OG0007310	0.2458	0	0.0001	0.5	0	0.00197677	ubiquitin carboxyl-terminal hydrolase 4 [Trichonephila inaurata madagascariensis]
OG0008395	0.1957	0	0.0001	0.484941	0	0.00197677	putative RNA polymerase II nuclear localization protein SLC7A6OS [Trichonephila inaurata madagascariensis]
OG0008488	0.3642	0	0.0001	0.5	0	0.00197677	fatty-acid amide hydrolase 2 [Trichonephila inaurata madagascariensis]
OG0009662	0.1791	0	0.0001	0.451993	0	0.00197677	hypothetical protein TNIN_91231 [Trichonephila inaurata madagascariensis]
OG0008358	0.5	0.0001	0.0001	0.5	0.0027912	0.00197677	uncharacterized protein TNCV_716601 [Trichonephila clavipes]
OG0009817	0.5	0.0001	0.0001	0.5	0.0027912	0.00197677	probable peptidyl-tRNA hydrolase 2 [Trichonephila inaurata madagascariensis]
OG0005496	0.2926	0.0004	0.0001	0.5	0.00982817	0.00197677	60S ribosomal protein L4 [Trichonephila inaurata madagascariensis]
OG0007199	0.2284	0.0007	0.0001	0.5	0.0159107	0.00197677	NAD(+) hydrolase sarm1 [Trichonephila inaurata madagascariensis]
OG0003708	0.5	0.0016	0.0001	0.5	0.0322682	0.00197677	chitin-binding type-2 domain-containing protein [Trichonephila inaurata madagascariensis]
OG0003457	0.5	0	0.0002	0.5	0	0.00361554	CAAX prenyl protease 1 homolog [Trichonephila inaurata madagascariensis]
OG0009665	0.5	0	0.0002	0.5	0	0.00361554	uncharacterized protein C7orf26 homolog [Trichonephila clavipes]
OG0006218	0.5	0.0001	0.0002	0.5	0.0027912	0.00361554	60S ribosomal protein L31 [Trichonephila inaurata madagascariensis]
OG0001901	0.1557	0	0.0003	0.406311	0	0.00504434	putative inorganic phosphate cotransporter [Trichonephila inaurata madagascariensis]
OG0010233	0.1567	0	0.0003	0.407853	0	0.00504434	regucalcin [Trichonephila inaurata madagascariensis]
OG0005696	0.5	0.0014	0.0004	0.5	0.0287329	0.00649116	splicing factor 3A subunit 2 [Trichonephila inaurata madagascariensis]
OG0004630	0.5	0	0.0006	0.5	0	0.00902328	e3 ubiquitin-protein ligase RNF38 [Trichonephila inaurata madagascariensis]
OG0007533	0.5	0	0.0006	0.5	0	0.00902328	mediator of RNA polymerase II transcription subunit 25 [Trichonephila inaurata madagascariensis]
OG0010065	0.5	0.0003	0.0006	0.5	0.00769632	0.00902328	methyl-CpG-binding domain protein 2 [Trichonephila inaurata madagascariensis]
OG0005497	0.5	0	0.0007	0.5	0	0.0101762	ras-related protein Rab-18 [Trichonephila inaurata madagascariensis]
OG0008713	0.5	0	0.0007	0.5	0	0.0101762	cathepsin O [Trichonephila inaurata madagascariensis]
OG0000955	0.3173	0.0002	0.0007	0.5	0.00528636	0.0101762	innexin inx2 [Trichonephila inaurata madagascariensis]
OG0003367	0.2528	0	0.0008	0.5	0	0.0113004	glutathione hydrolase 1 proenzyme [Trichonephila inaurata madagascariensis]
OG0007906	0.0956	0	0.0008	0.276919	0	0.0113004	ATP-dependent RNA helicase DDX42 [Trichonephila inaurata madagascariensis]
OG0004860	0.4934	0	0.0009	0.5	0	0.0124115	cyclin-dependent kinase 8 [Trichonephila inaurata madagascariensis]
OG0001405	0.5	0.0004	0.0009	0.5	0.00982817	0.0124115	solute carrier family 41 member 1 [Trichonephila inaurata madagascariensis]
OG0009376	0.5	0.0001	0.001	0.5	0.0027912	0.0133678	zinc transporter ZIP11 [Trichonephila inaurata madagascariensis]
OG0010916	0.5	0.0016	0.001	0.5	0.0322682	0.0133678	venom factor [Trichonephila inaurata madagascariensis]
OG0004521	0.5	0	0.0012	0.5	0	0.0157398	tyrosine-protein phosphatase non-receptor type 21 [Trichonephila inaurata madagascariensis]
OG0005592	0.2792	0	0.0013	0.5	0	0.0166448	transmembrane protease serine 6 [Trichonephila inaurata madagascariensis]
OG0002100	0.4675	0.0001	0.0013	0.5	0.0027912	0.0166448	serrate RNA effector molecule homolog [Trichonephila inaurata madagascariensis]
OG0007604	0.5	0.0001	0.0013	0.5	0.0027912	0.0166448	ras-related protein Rab-8A [Trichonephila inaurata madagascariensis]
OG0004364	0.2933	0	0.0014	0.5	0	0.0176658	exportin-1 [Trichonephila inaurata madagascariensis]
OG0003044	0.2535	0	0.0017	0.5	0	0.0208116	hypothetical protein TNIN_464931 [Trichonephila inaurata madagascariensis]
OG0004858	0.5	0	0.0018	0.5	0	0.0215444	folliculin [Trichonephila inaurata madagascariensis]
OG0010659	0.3502	0.0002	0.0023	0.5	0.00528636	0.0261391	mitochondrial import receptor subunit TOM20 homolog [Trichonephila inaurata madagascariensis]
OG0008895	0.3848	0.0007	0.0027	0.5	0.0159107	0.029717	4-trimethylaminobutyraldehyde dehydrogenase [Trichonephila inaurata madagascariensis]
OG0004407	0.4854	0	0.0028	0.5	0	0.0305288	insulin receptor substrate 2-A [Trichonephila inaurata madagascariensis]
OG0006776	0.353	0.0003	0.0028	0.5	0.00769632	0.0305288	hypothetical protein TNIN_158571 [Trichonephila inaurata madagascariensis]
OG0005168	0.0539	0	0.0029	0.174208	0	0.0313254	tubulin-specific chaperone E [Trichonephila inaurata madagascariensis]
OG0010125	0.5	0.0001	0.0031	0.5	0.0027912	0.0329251	nucleoredoxin [Trichonephila inaurata madagascariensis]
OG0005917	0.1832	0	0.0032	0.459515	0	0.0337815	60S ribosomal protein L18 [Trichonephila inaurata madagascariensis]
OG0010012	0.5	0	0.0032	0.5	0	0.0337815	peptidyl-prolyl cis-trans isomerase E [Trichonephila inaurata madagascariensis]
OG0003628	0.076	0.0002	0.0037	0.231888	0.00528636	0.0375817	SUMO-conjugating enzyme UBC9 [Trichonephila inaurata madagascariensis]
OG0007249	0.5	0.0002	0.0037	0.5	0.00528636	0.0375817	elongin-A [Trichonephila inaurata madagascariensis]
OG0002211	0.429	0.0006	0.0037	0.5	0.014097	0.0375817	tubby protein homolog [Trichonephila clavipes]
OG0010084	0.2756	0	0.0039	0.5	0	0.0391009	endothelial differentiation-related factor 1 [Trichonephila inaurata madagascariensis]
OG0004266	0.322	0	0.0045	0.5	0	0.0436732	laminin subunit gamma-1 [Trichonephila inaurata madagascariensis]
OG0004583	0.3933	0.0001	0.0045	0.5	0.0027912	0.0436732	gamma-interferon-inducible lysosomal thiol reductase [Trichonephila inaurata madagascariensis]
OG0003431	0.3421	0.0006	0.0045	0.5	0.014097	0.0436732	e3 ubiquitin-protein ligase SMURF2 [Trichonephila inaurata madagascariensis]
OG0001619	0.5	0	0.0048	0.5	0	0.046327	protein PRRC2C, partial [Trichonephila inaurata madagascariensis]
OG0000941	0.429	0.0009	0.005	0.5	0.0200006	0.0474694	sucrase-isomaltase, intestinal [Trichonephila clavipes]
OG0007195	0.5	0.0021	0.0052	0.5	0.0409324	0.0489024	hypothetical protein TNIN_373791 [Trichonephila inaurata madagascariensis]
OG0009562	0.2438	0	0.0053	0.5	0	0.0495092	dynactin subunit 3 [Trichonephila inaurata madagascariensis]

## Sheet: Table S10
Table S10. Information of enriched gene ontologies for genes under convergent relaxation in invasive spider branches with significance.
go_id	Pvalue	adjusted-Pvalue	go_term
GO:0009987	8.1176e-09	0	cellular process
GO:0050794	4.21365e-06	0	regulation of cellular process
GO:0044238	9.10743e-06	0	primary metabolic process
GO:0009056	1.03389e-05	0	catabolic process
GO:0008152	1.23034e-05	0	metabolic process
GO:0044248	1.68522e-05	0	cellular catabolic process
GO:0050789	2.66325e-05	0	regulation of biological process
GO:0023051	2.79346e-05	0	regulation of signaling
GO:0065007	2.91203e-05	0	biological regulation
GO:0010646	2.96602e-05	0	regulation of cell communication
GO:0035556	4.63297e-05	0.0033	intracellular signal transduction
GO:0044237	3.01753e-05	0.0036	cellular metabolic process
GO:0023056	6.24085e-05	0.004	positive regulation of signaling
GO:0009968	5.38941e-05	0.0043	negative regulation of signal transduction
GO:0032787	5.18304e-05	0.0046	monocarboxylic acid metabolic process
GO:0010647	6.51566e-05	0.005	positive regulation of cell communication
GO:0007224	0.0001801	0.0089	smoothened signaling pathway
GO:1902531	0.000178641	0.0092	regulation of intracellular signal transduction
GO:0009967	0.000114118	0.0095	positive regulation of signal transduction
GO:0016042	0.000162678	0.0096	lipid catabolic process
GO:0008589	0.000113696	0.01	regulation of smoothened signaling pathway
GO:0048523	0.000126581	0.01	negative regulation of cellular process
GO:0048585	0.000160064	0.01	negative regulation of response to stimulus
GO:0006631	0.000155602	0.0104	fatty acid metabolic process
GO:0044242	0.00010062	0.0105	cellular lipid catabolic process
GO:0141124	0.000203805	0.0107	intracellular signaling cassette
GO:0071560	0.000202473	0.011	cellular response to transforming growth factor beta stimulus
GO:0010648	9.1619e-05	0.0111	negative regulation of cell communication
GO:0071559	0.000202473	0.0114	response to transforming growth factor beta
GO:0023057	8.76138e-05	0.0118	negative regulation of signaling
GO:0007154	0.000283235	0.0125	cell communication
GO:0023052	0.000244155	0.0129	signaling
GO:0019058	0.000324154	0.0131	viral life cycle
GO:0009966	0.000305566	0.0135	regulation of signal transduction
GO:0006084	0.000286051	0.0139	acetyl-CoA metabolic process
GO:0048519	0.00042873	0.0267	negative regulation of biological process
GO:0045880	0.00046936	0.027	positive regulation of smoothened signaling pathway
GO:0016032	0.000511875	0.0284	viral process
GO:0042127	0.000566949	0.0287	regulation of cell population proliferation
GO:0009062	0.000655816	0.0305	fatty acid catabolic process
GO:0043436	0.000633002	0.0312	oxoacid metabolic process
GO:0019752	0.000619096	0.0314	carboxylic acid metabolic process
GO:0048583	0.000611222	0.0322	regulation of response to stimulus
GO:0043412	0.000608539	0.033	macromolecule modification
GO:0019538	0.000852269	0.0336	protein metabolic process
GO:0048584	0.000679354	0.0339	positive regulation of response to stimulus
GO:0002181	0.000736493	0.034	cytoplasmic translation
GO:0051649	0.00078415	0.0342	establishment of localization in cell
GO:0050896	0.000846806	0.0343	response to stimulus
GO:0006082	0.000676277	0.0347	organic acid metabolic process
GO:0072329	0.00102593	0.0392	monocarboxylic acid catabolic process
GO:0070727	0.00104917	0.0392	cellular macromolecule localization
GO:0008283	0.00134363	0.041	cell population proliferation
GO:0045879	0.00134176	0.0417	negative regulation of smoothened signaling pathway
GO:0008104	0.00121784	0.0419	protein localization
GO:0007165	0.00132356	0.0421	signal transduction
GO:0036211	0.00113133	0.0426	protein modification process
GO:0006796	0.00131195	0.0429	phosphate-containing compound metabolic process
GO:0006793	0.00131195	0.0436	phosphorus metabolic process
GO:0048172	0.00138682	0.0463	regulation of short-term neuronal synaptic plasticity
GO:0006886	0.00162643	0.0495	intracellular protein transport

[truncated: 1 more sheets: Table S11]
